# Supplementary material for: Highly efficient enantioselective three-component synthesis of 2-amino-4H-chromenes catalysed by chiral tertiary amine-thioureas
Source: Royal Society of Chemistry journal article supplement (doi:10.1039/c2cc30731f), 2012-01-01

# Highly Efficient Enantioselective Three-Component Synthesis of 2-Amino-4*H*-Chromenes Catalysed by Chiral Tertiary Amine-Thioureas

Gaosheng Yang,\* Chongrong Luo, Xiaolong Mu, Tingting Wang, Xin-Yuan Liu\*

*Anhui Key Laboratory of Functional Molecular Solids, College of Chemistry and Materials Science, Anhui*

*Normal University, Wuhu, Anhui 241000, China*

*gshyang@mail.ahnu.edu.cn; xyliu79@gmail.com*

## Content

|                                                                          |         |
|--------------------------------------------------------------------------|---------|
| General information.....                                                 | S2      |
| X-ray crystallographic analysis.....                                     | S2–S4   |
| Control experiments for mechanistic study.....                           | S5      |
| General procedure for the enantioselective three-component reaction..... | S5      |
| Characterization data for products.....                                  | S6–S13  |
| <sup>1</sup> H, <sup>13</sup> C NMR Spectra of the products.....         | S14–S33 |
| HPLC Profile of the products.....                                        | S34–S51 |

**General information.** All the enantioselective three-component reactions of salicylaldehyde, malononitrile/cyanoacetate with nitromethane were carried out with flame-dried Schlenk-type glassware. The chiral tertiary amino-thiourea catalysts derived from (1R, 2R)-cyclohexane-1,2-diamine were synthesized according to reference.<sup>[1]</sup> The catalyst derived from cinchona alkaloids was synthesized according to reference.<sup>[2]</sup> All the other reagents were purchased from commercial suppliers and purified by standard techniques. Flash column chromatography was performed using silica gel (200–400 mesh). For thin-layer chromatography (TLC), silica gel plates (HSGF 254) were used and compounds were visualized by irradiation with UV light. <sup>1</sup>H NMR (300 MHz) and <sup>13</sup>C NMR (75 MHz) spectra were recorded at 300 MHz NMR spectrometer in CDCl<sub>3</sub> or DMSO-d<sub>6</sub>. All chemical shifts ( $\delta$ ) are given in ppm relative to TMS ( $\delta$  = 0 ppm) as internal standard. Data are reported as follows: chemical shift, multiplicity, coupling constants and integration. Melting points were uncorrected. IR spectra were reported in frequency of absorption (cm<sup>-1</sup>). High resolution mass spectral (HRMS) data were obtained with an ionization mode of ESI.

## References

- [1] T. Okino, Y. Hoashi and Y. Takemoto, *J. Am. Chem. Soc.*, 2003, **125**, 12672.  
[2] N. Zhu, B.-C. Ma, Y. Zhang and W. Wang, *Adv. Synth. Catal.*, 2010, **352**, 1291.

## X-ray crystallographic analysis

The single crystals of the products **4b**, **5b** and the intermediate **1a** suitable for X-ray crystallographic analysis were obtained by recrystallization from dichloromethane/isopropanol, dichloromethane/n-hexane, and dichloromethane respectively. The single crystal X-ray diffraction data for the three compounds were collected on a diffractometer with graphite

monochromated Mo K $\alpha$  radiation ( $\lambda = 0.71073 \text{ \AA}$ ) at room temperature. Saint program and SADABS program carried out the data integration. The structure was solved by a direct method and refined on F<sup>2</sup> using SHELXTL suite of program. All non-hydrogen atoms were anisotropically refined by full-matrix least squares methods. All hydrogen atoms were geometrically generated and isotropically refined using a riding model. The details of the X-ray data collection, structure solution and structure refinements are given in Table S1.

**Table S1** Crystallographic data and structural refinement details for compound **4b**, **5b** and **1a**.

| Compound                                                               | <b>4b</b>                                                      | <b>5b</b>                                                       | <b>1a</b>                                       |
|------------------------------------------------------------------------|----------------------------------------------------------------|-----------------------------------------------------------------|-------------------------------------------------|
| Formula                                                                | C <sub>11</sub> H <sub>8</sub> BrN <sub>3</sub> O <sub>3</sub> | C <sub>13</sub> H <sub>13</sub> BrN <sub>2</sub> O <sub>5</sub> | C <sub>10</sub> H <sub>6</sub> N <sub>2</sub> O |
| Formula weight                                                         | 310.10                                                         | 357.15                                                          | 170.17                                          |
| Temperature/K                                                          | 293(2)                                                         | 293(2)                                                          | 293(2)                                          |
| Crystal system                                                         | Monoclinic                                                     | Monoclinic                                                      | Monoclinic                                      |
| Space group                                                            | P21                                                            | P21                                                             | P21/c                                           |
| <i>a</i> /Å                                                            | 9.397(6)                                                       | 5.413(2)                                                        | 11.833(4)                                       |
| <i>b</i> /Å                                                            | 5.142(3)                                                       | 17.675(7)                                                       | 9.268(3)                                        |
| <i>c</i> /Å                                                            | 12.852(8)                                                      | 7.539(3)                                                        | 7.280(2)                                        |
| $\beta$ /°                                                             | 109.6(7)                                                       | 96.083(5)                                                       | 95.8(4)                                         |
| <i>V</i> /Å <sup>3</sup>                                               | 584.9(6)                                                       | 717.2(5)                                                        | 794.2(4)                                        |
| <i>Z</i>                                                               | 2                                                              | 2                                                               | 4                                               |
| $\mu$ (Mo K $\alpha$ ), mm <sup>-1</sup>                               | 3.518                                                          | 2.889                                                           | 0.096                                           |
| $\theta$ range for data collection, deg                                | 1.7 to 27.7                                                    | 2.3 to 27.5                                                     | 1.7 to 27.6                                     |
| Reflections collected                                                  | 4955                                                           | 5934                                                            | 6600                                            |
| Unique reflections/ <i>R</i> <sub>int</sub>                            | 2349 / <i>R</i> (int) = 0.105                                  | 2951 / <i>R</i> (int) = 0.056                                   | 1835 / <i>R</i> (int) = 0.021                   |
| Goodness-of-fit on F <sup>2</sup>                                      | 0.89                                                           | 0.99                                                            | 0.98                                            |
| <i>R</i> , <i>R</i> <sub>w</sub> [ <i>I</i> > 2 $\sigma$ ( <i>I</i> )] | 0.0811, 0.2211                                                 | 0.0547, 0.1541                                                  | 0.0530, 0.1773                                  |
| Residual $\rho$ /(e·Å <sup>-3</sup> )                                  | 1.33, -0.73                                                    | 1.08, -0.50                                                     | 0.39, -0.42                                     |
| Flack $\chi$                                                           | 0.03(3)                                                        | 0.016(17)                                                       | /                                               |
| CCDC No.                                                               | 860045                                                         | 860044                                                          | 860046                                          |

**Figure S1** X-ray structure (50 % probability ellipsoids) of **4b**, **5b** and **Ia**.

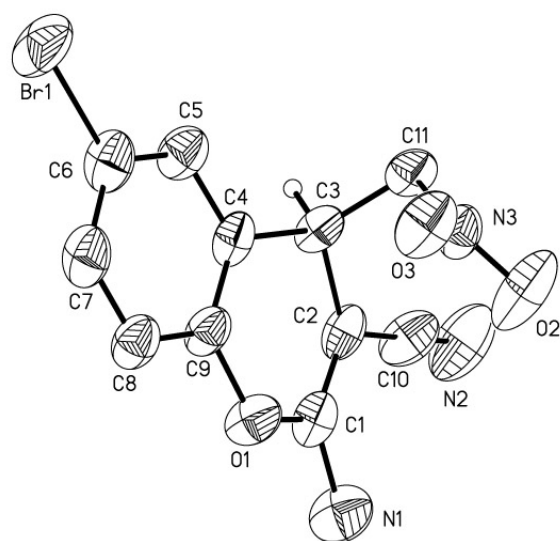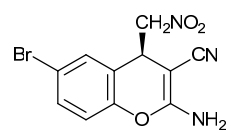

**4b**

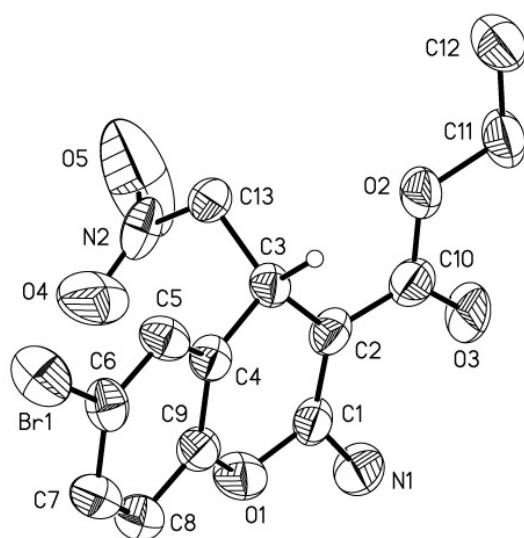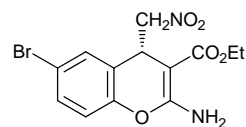

**5b**

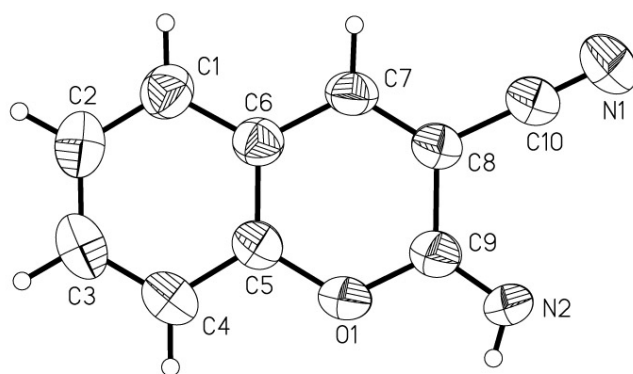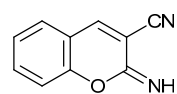

**Ia**

**Scheme S1** Control experiments for mechanistic study.

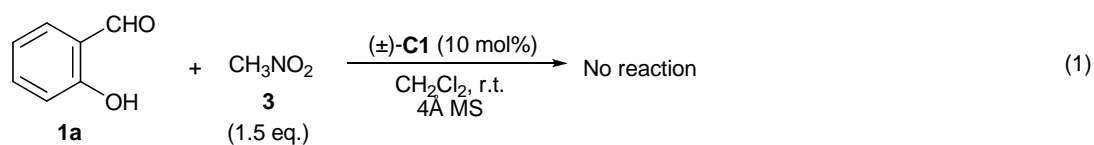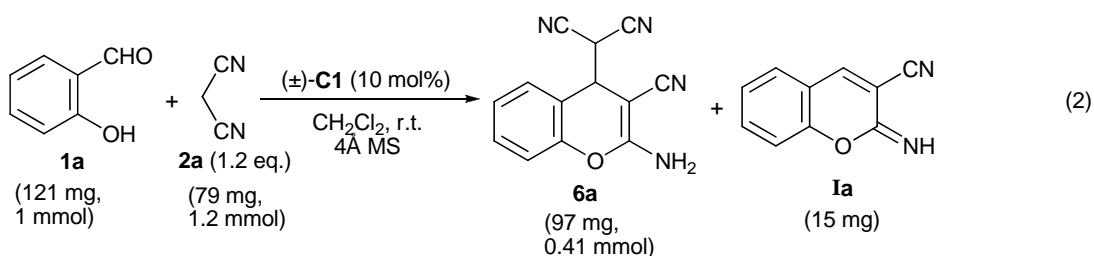

**General procedure for the enantioselective three-component reaction:** To a solution of salicylaldehyde **1** (0.3 mmol, 1.0 equiv), malononitrile/ethyl cyanoacetate **2** (0.36 mmol, 1.2 equiv), nitromethane **3** (0.45 mmol, 1.5 equiv) and 50 mg of 4Å MS in CH<sub>2</sub>Cl<sub>2</sub> (1.5 mL) at room temperature, was added catalyst **C3** (0.03 mmol) in one portion. The resulting reaction mixture was stirred at room temperature and monitored by TLC. Upon completion, the solvent was removed under vacuum and the residue was purified by flash chromatography to afford the desired product.

**(R)-2-Amino-4-(nitromethyl)-4H-chromene-3-carbonitrile (4a):** Purified by column chromatography (petroleum ether/ethyl acetate = 3/1) to afford a yellow solid in 88% yield and 84% ee. The ee was determined by HPLC analysis using a Chiralcel OJ-H column (3/2 hexane/*i*-PrOH; flow rate 1.0 mL/min;  $\lambda$  = 254 nm;  $t_{\text{major}}$  = 25.8 min,  $t_{\text{minor}}$  = 19.9 min).  $[\alpha]_{\text{D}}^{20}$  = -66.3 ( $c$  = 0.51, EtOAc). Mp: 139–140 °C. **IR** (KBr):  $\nu$  = 3451, 3337, 2191, 1655, 1612, 1584, 1537, 1491, 1460, 1379, 1275, 1227  $\text{cm}^{-1}$ .  **$^1\text{H}$  NMR** (300 MHz,  $\text{CDCl}_3$ ):  $\delta$  = 7.35–7.28 (m, 1H), 7.21–7.13 (m, 2H), 7.04 (d,  $J$  = 8.2 Hz, 1H), 4.85 (s, 2H), 4.62 (dd,  $J$  = 12.1, 4.7 Hz, 1H), 4.50 (dd,  $J$  = 12.1, 7.1 Hz, 1H), 4.37 (dd,  $J$  = 7.1, 4.7 Hz, 1H) ppm.  **$^{13}\text{C}$  NMR** (75 MHz,  $\text{CDCl}_3$ ):  $\delta$  = 161.7, 149.3, 129.6, 127.9, 125.7, 118.6, 116.9, 80.2, 54.2, 34.8 ppm. **HRMS** (ESI): calcd for  $\text{C}_{11}\text{H}_{10}\text{N}_3\text{O}_3$   $[\text{M}+\text{H}]^+$  232.0722; found 232.0711.

**(R)-2-Amino-6-bromo-4-(nitromethyl)-4H-chromene-3-carbonitrile (4b):** Purified by column chromatography (petroleum ether/ethyl acetate = 3/1) to afford a white solid in 92% yield and 87% ee. The ee was determined by HPLC analysis using a Chiralcel OJ-H column (3/2 hexane/*i*-PrOH; flow rate 1.0 mL/min;  $\lambda$  = 254 nm;  $t_{\text{R}}$  = 34.9 (major), 21.7 (minor) min).  $[\alpha]_{\text{D}}^{20}$  = -15.7 ( $c$  = 0.61, EtOAc). Mp: 177–178 °C. **IR** (KBr):  $\nu$  = 3456, 3308, 2205, 1653, 1637, 1601, 1574, 1530, 1481, 1423, 1375, 1271, 1225  $\text{cm}^{-1}$ .  **$^1\text{H}$  NMR** (300 MHz,  $\text{DMSO}-d_6$ ):  $\delta$  = 7.63 (s, 1H), 7.49 (d,  $J$  = 8.7 Hz, 1H), 7.23 (s, 2H), 6.99 (d,  $J$  = 8.7 Hz, 1H), 4.87 (dd,  $J$  = 12.8, 4.8 Hz, 1H), 4.69 (dd,  $J$  = 12.8, 4.8 Hz, 1H), 4.33 (t,  $J$  = 4.8 Hz, 1H) ppm.  **$^{13}\text{C}$  NMR** (75 MHz,  $\text{DMSO}-d_6$ ):  $\delta$  = 162.3, 149.2, 132.2, 131.3, 122.4, 119.9, 118.8, 116.6, 80.8, 50.2, 34.7 ppm. **HRMS** (ESI): calcd for  $\text{C}_{11}\text{H}_9\text{BrN}_3\text{O}_3$   $[\text{M}+\text{H}]^+$  309.9827; found 309.9816.

**(R)-2-Amino-6-chloro-4-(nitromethyl)-4H-chromene-3-carbonitrile (4c):** Purified by column chromatography (petroleum ether/ethyl acetate = 3/1) to afford a white solid in 85% yield and 82% ee. The ee was determined by HPLC analysis using a Chiralcel OJ-H column (3/2 hexane/*i*-PrOH; flow rate 1.0 mL/min;  $\lambda$  = 254 nm;  $t_{\text{R}}$  = 33.5 (major), 18.1 (minor) min).  $[\alpha]_{\text{D}}^{20}$  = -24.7 ( $c$  = 0.59, EtOAc). Mp: 165–166 °C. **IR**

(KBr):  $\nu$  = 3460, 3308, 2205, 1655, 1636, 1601, 1576, 1530, 1483, 1427, 1377, 1271, 1227  $\text{cm}^{-1}$ .  **$^1\text{H}$  NMR** (300 MHz,  $\text{DMSO-}d_6$ ):  $\delta$  = 7.51 (d,  $J$  = 2.5 Hz, 1H), 7.37 (dd,  $J$  = 8.7, 2.5 Hz, 1H), 7.21 (s, 2H), 7.06 (d,  $J$  = 8.7 Hz, 1H), 4.87 (dd,  $J$  = 12.6, 5.0 Hz, 1H), 4.70 (dd,  $J$  = 12.6, 4.8 Hz, 1H), 4.33 (t,  $J$  = 4.8 Hz, 1H) ppm.  **$^{13}\text{C}$  NMR** (75 MHz,  $\text{DMSO-}d_6$ ):  $\delta$  = 162.3, 148.8, 129.4, 128.7, 128.4, 122.0, 119.9, 118.5, 80.8, 50.2, 34.8 ppm. **HRMS** (ESI): calcd for  $\text{C}_{11}\text{H}_9\text{ClN}_3\text{O}_3$   $[\text{M}+\text{H}]^+$  266.0332; found 266.0320.

**(*R*)-2-Amino-6-nitro-4-(nitromethyl)-4*H*-chromene-3-carbonitrile (4d):** Purified by column chromatography (petroleum ether/ethyl acetate = 2/1) to afford a yellow solid in 80% yield and 81% ee. The ee was determined by HPLC analysis using a Chiralcel OJ-H column (1/3 hexane/*i*-PrOH; flow rate 1.0 mL/min;  $\lambda$  = 254 nm;  $t_R$  = 30.0 (major), 19.3 (minor) min).  $[\alpha]_D^{20}$  = +26.5 ( $c$  = 0.46, EtOAc). Mp: 171–172°C. **IR** (KBr):  $\nu$  = 3449, 3362, 2191, 1651, 1582, 1416, 1348, 1306, 1264  $\text{cm}^{-1}$ .  **$^1\text{H}$  NMR** (300 MHz,  $\text{DMSO-}d_6$ ):  $\delta$  = 8.41 (d,  $J$  = 2.7 Hz, 1H), 8.19 (dd,  $J$  = 9.0, 2.7 Hz, 1H), 7.38 (s, 2H), 7.27 (d,  $J$  = 9.0 Hz, 1H), 4.99 (dd,  $J$  = 12.9, 4.5 Hz, 1H), 4.76 (dd,  $J$  = 12.9, 4.5 Hz, 1H), 4.48 (t,  $J$  = 4.5 Hz, 1H) ppm.  **$^{13}\text{C}$  NMR** (75 MHz,  $\text{DMSO-}d_6$ ):  $\delta$  = 161.8, 154.4, 144.2, 125.2, 125.1, 121.6, 119.5, 118.0, 80.7, 50.3, 34.5 ppm. **HRMS** (ESI): calcd for  $\text{C}_{11}\text{H}_8\text{N}_4\text{O}_5\text{Na}$   $[\text{M}+\text{Na}]^+$  299.0392; found 299.0387.

**(*R*)-2-Amino-6,8-dibromo-4-(nitromethyl)-4*H*-chromene-3-carbonitrile (4e):** Purified by column chromatography (petroleum ether/ethyl acetate = 3/1) to afford a white solid in 78% yield and 96% ee. The ee was determined by HPLC analysis using a Chiralcel OJ-H column (1/1 hexane/*i*-PrOH; flow rate 1.0 mL/min;  $\lambda$  = 254 nm;  $t_R$  = 28.9 (major), 20.0 (minor) min).  $[\alpha]_D^{20}$  = 33.8 ( $c$  = 0.55, EtOAc). Mp: 211–212°C. **IR** (KBr):  $\nu$  = 3431, 3316, 2207, 1659, 1614, 1541, 1458, 1418, 1377, 1246, 1196  $\text{cm}^{-1}$ .  **$^1\text{H}$  NMR** (300 MHz,  $\text{DMSO-}d_6$ ):  $\delta$  = 7.88 (s, 1H), 7.66 (s, 1H), 7.38 (s, 2H), 4.90 (dd,  $J$  = 12.8, 4.7 Hz, 1H), 4.72 (dd,  $J$  = 12.8, 4.7 Hz, 1H), 4.38 (t,  $J$  = 4.7 Hz, 1H) ppm.  **$^{13}\text{C}$  NMR** (75 MHz,  $\text{DMSO-}d_6$ ):  $\delta$  = 161.4, 145.9, 134.3, 130.4, 123.5, 118.9, 116.2, 110.5, 80.1, 50.1, 34.6 ppm. **HRMS** (ESI): calcd for  $\text{C}_{11}\text{H}_7\text{Br}_2\text{N}_3\text{O}_3\text{Na}$   $[\text{M}+\text{Na}]^+$  409.8752; found

409.8751.

**(R)-2-Amino-6,8-dichloro-4-(nitromethyl)-4H-chromene-3-carbonitrile (4f):** Purified by column chromatography (petroleum ether/ethyl acetate = 3/1) to afford a yellow solid in 75% yield and 80% ee. The ee was determined by HPLC analysis using a Chiralcel OJ-H column (1/1 hexane/*i*-PrOH; flow rate 1.0 mL/min;  $\lambda$  = 254 nm;  $t_R$  = 30.6 (major), 17.0 (minor) min). Mp: 208–209°C. **IR** (KBr):  $\nu$  = 3428, 3318, 2210, 1661, 1616, 1572, 1541, 1464, 1423, 1381, 1248, 1200  $\text{cm}^{-1}$ .  **$^1\text{H}$  NMR** (300 MHz,  $\text{DMSO-}d_6$ ):  $\delta$  = 7.67 (d,  $J$  = 2.4 Hz, 1H), 7.52 (d,  $J$  = 2.4 Hz, 1H), 7.39 (s, 2H), 4.91 (dd,  $J$  = 12.9, 4.8 Hz, 1H), 4.72 (dd,  $J$  = 12.9, 4.8 Hz, 1H), 4.38 (t,  $J$  = 4.8 Hz, 1H) ppm.  **$^{13}\text{C}$  NMR** (75 MHz,  $\text{DMSO-}d_6$ ):  $\delta$  = 161.3, 144.5, 128.9, 128.2, 127.0, 123.2, 121.2, 119.0, 80.1, 49.9, 34.5 ppm. **HRMS** (ESI): calcd for  $\text{C}_{11}\text{H}_8\text{Cl}_2\text{N}_3\text{O}_3$   $[\text{M}+\text{H}]^+$  299.9942; found 299.9936.

**(R)-2-Amino-5-methoxy-4-(nitromethyl)-4H-chromene-3-carbonitrile (4g):** Purified by column chromatography (petroleum ether/ethyl acetate = 3/1) to afford a yellow solid in 64% yield and 83% ee. The ee was determined by HPLC analysis using a Chiralcel OJ-H column (1/1 hexane/*i*-PrOH; flow rate 1.0 mL/min;  $\lambda$  = 254 nm;  $t_R$  = 20.7 (major), 16.1 (minor) min).  $[\alpha]_D^{20}$  = –29.2 ( $c$  = 0.52, EtOAc). Mp: 139–140°C. **IR** (KBr):  $\nu$  = 3445, 3331, 2191, 1651, 1635, 1618, 1599, 1487, 1472, 1423, 1253, 1090  $\text{cm}^{-1}$ .  **$^1\text{H}$  NMR** (300 MHz,  $\text{DMSO-}d_6$ ):  $\delta$  = 7.30 (t,  $J$  = 8.3 Hz, 1H), 7.16 (s, 2H), 6.85 (d,  $J$  = 8.3 Hz, 1H), 6.64 (d,  $J$  = 8.3 Hz, 1H), 4.67–4.56 (m, 2H), 4.24 (t,  $J$  = 4.7 Hz, 1H), 3.83 (s, 3H) ppm.  **$^{13}\text{C}$  NMR** (75 MHz,  $\text{DMSO-}d_6$ ):  $\delta$  = 162.5, 156.7, 150.7, 130.0, 120.2, 108.9, 108.2, 107.3, 79.6, 56.6, 50.7, 31.7 ppm. **HRMS** (ESI): calcd for  $\text{C}_{12}\text{H}_{12}\text{N}_3\text{O}_4$   $[\text{M}+\text{H}]^+$  262.0828; found 262.0820.

**2-Amino-4-(1-nitroethyl)-4H-chromene-3-carbonitrile (4h):** Purified by column chromatography (petroleum ether/ethyl acetate = 3/1) to afford a white solid in 88% yield, 43/57 dr and 58% ee<sub>1</sub>, 75% ee<sub>2</sub>. The ee was determined by HPLC analysis using a Chiralcel OJ-H column (9/1 hexane/*i*-PrOH; flow rate 1.0



mL/min;  $\lambda$  = 254 nm;  $t_R$  = 65.4 (major<sub>1</sub>), 74.8 (minor<sub>1</sub>), 100.0 (major<sub>2</sub>), 84.2 (minor<sub>2</sub>) min).  $[\alpha]_D^{20}$  = -35.9 (c = 1.03, EtOAc). Mp: 138–139°C. **IR** (KBr):  $\nu$  = 3319, 3269, 2197, 1638, 1605, 1578, 1541, 1487, 1456, 1420, 1389, 1362 cm<sup>-1</sup>. **<sup>1</sup>H NMR** (300 MHz, DMSO-*d*<sub>6</sub>):  $\delta$  = 7.39–7.13 (m, 5H), 7.10–7.01 (m, 1H), 4.87–4.71 (m, 1H), 4.29–4.18 (m, 1H), 1.38–1.26 (m, 3H) ppm. **<sup>13</sup>C NMR** (75.5 MHz, DMSO-*d*<sub>6</sub>):  $\delta$  = 163.2, 163.0, 149.9, 149.8, 129.1, 128.5, 128.3, 124.8, 120.2, 119.81, 119.79, 119.4, 116.1, 115.9, 87.3, 86.9, 49.2, 48.4, 14.1, 13.5 ppm. **HRMS** (ESI): calcd for C<sub>12</sub>H<sub>12</sub>N<sub>3</sub>O<sub>3</sub> [M + H]<sup>+</sup> 246.0878; found 246.0870.

**(S)-Ethyl 2-amino-4-(nitromethyl)-4H-chromene-3-carboxylate (5a):** Purified by column chromatography (petroleum ether/ethyl acetate = 10/1) to afford a white solid in 76% yield and 87% ee. The ee was determined by HPLC analysis using a Chiralcel OJ-H column (3/2 hexane/*i*-PrOH; flow rate 1.0 mL/min;  $\lambda$  = 254 nm;  $t_R$  = 20.7 (major), 13.8 (minor) min).  $[\alpha]_D^{20}$  = 87.7 (c = 0.9, EtOAc). Mp: 109–110°C. **IR** (KBr):  $\nu$  = 3451, 3316, 1672, 1630, 1537, 1512, 1485, 1456, 1410, 1381, 1300 cm<sup>-1</sup>. **<sup>1</sup>H NMR** (300 MHz, CDCl<sub>3</sub>):  $\delta$  = 7.31–7.24 (m, 1H), 7.21–7.09 (m, 2H), 7.05–6.99 (m, 1H), 6.82–5.88 (br s, 2H), 4.65 (dd,  $J$  = 8.0, 4.4 Hz, 1H), 4.54 (dd,  $J$  = 11.2, 4.4 Hz, 1H), 4.39 (dd,  $J$  = 11.2, 8.0 Hz, 1H), 4.30–4.19 (m, 2H), 1.34 (t,  $J$  = 7.1 Hz, 3H) ppm. **<sup>13</sup>C NMR** (75 MHz, CDCl<sub>3</sub>):  $\delta$  = 168.3, 162.0, 149.8, 128.9, 128.2, 125.0, 121.8, 116.3, 81.2, 73.0, 59.9, 34.3, 14.5 ppm. **HRMS** (ESI): calcd for C<sub>13</sub>H<sub>15</sub>N<sub>2</sub>O<sub>5</sub> [M+H]<sup>+</sup> 279.0981; found 279.0969.

**(S)-Ethyl 2-amino-6-bromo-4-(nitromethyl)-4H-chromene-3-carboxylate (5b):** Purified by column chromatography (petroleum ether/ethyl acetate = 10/1) to afford a white solid in 83% yield and 91% ee. The ee was determined by HPLC analysis using a Chiralcel OJ-H column/OJ-H column (8/1 hexane/*i*-PrOH; flow rate 1.0 mL/min;  $\lambda$  = 254 nm;  $t_R$  = 111.2 (major), 127.1 (minor) min).  $[\alpha]_D^{20}$  = 35.9 (c = 1.38, EtOAc). Mp: 128–129°C. **IR** (KBr):  $\nu$  = 3462, 3306, 1676, 1616, 1541, 1477, 1410, 1379, 1315, 1290, 1221 cm<sup>-1</sup>. **<sup>1</sup>H NMR** (300 MHz, CDCl<sub>3</sub>):  $\delta$  = 7.38 (dd,  $J$  = 8.7, 2.4 Hz, 1H), 7.34 (d,  $J$  = 2.4 Hz, 1H), 6.91 (d,  $J$  = 8.7 Hz, 1H), 6.80–5.88 (br s, 2H), 4.59 (dd,  $J$  = 7.5, 4.2 Hz, 1H), 4.50 (dd,  $J$  = 11.7, 4.2 Hz, 1H), 4.43 (dd,  $J$  = 11.7, 7.5 Hz,

1H), 4.30–4.18 (m, 2H), 1.33 (t,  $J = 7.1$  Hz, 3H) ppm.  $^{13}\text{C}$  NMR (75 MHz,  $\text{CDCl}_3$ ):  $\delta = 167.9, 161.5, 148.9, 131.7, 130.8, 123.8, 117.8, 117.2, 80.6, 72.4, 59.9, 33.8, 14.3$  ppm. HRMS (ESI): calcd for  $\text{C}_{13}\text{H}_{14}\text{BrN}_2\text{O}_5$   $[\text{M}+\text{H}]^+$  357.0086; found 357.0074.

**(S)-Ethyl 2-amino-6-chloro-4-(nitromethyl)-4H-chromene-3-carboxylate (5c):** Purified by column chromatography (petroleum ether/ethyl acetate = 10/1) to afford a white solid in 76% yield and 84% ee. The ee was determined by HPLC analysis using a Chiralcel AS-H column (11/1 hexane/*i*-PrOH; flow rate 1.0 mL/min;  $\lambda = 254$  nm;  $t_R = 23.7$  (major), 27.1 (minor) min).  $[\alpha]_D^{20} = 29.1$  ( $c = 1.05$ , EtOAc). Mp: 141–142°C. IR (KBr):  $\nu = 3474, 3312, 2982, 1678, 1620, 1541, 1518, 1483, 1418, 1377, 1317, 1292, 1221$   $\text{cm}^{-1}$ .  $^1\text{H}$  NMR (300 MHz,  $\text{CDCl}_3$ ):  $\delta = 7.24$  (dd,  $J = 8.7, 2.4$  Hz, 1H), 7.19 (d,  $J = 2.4$  Hz, 1H), 6.96 (d,  $J = 8.7$  Hz, 1H), 6.82–5.95 (br s, 2H), 4.59 (dd,  $J = 7.5, 4.2$  Hz, 1H), 4.52 (dd,  $J = 11.6, 4.2$  Hz, 1H), 4.43 (dd,  $J = 11.6, 7.5$  Hz, 1H), 4.30–4.18 (m, 2H), 1.34 (t,  $J = 7.2$  Hz, 3H) ppm.  $^{13}\text{C}$  NMR (75 MHz,  $\text{CDCl}_3$ ):  $\delta = 167.9, 161.5, 148.3, 129.8, 128.8, 127.8, 123.3, 117.5, 80.6, 72.3, 59.9, 33.9, 14.3$  ppm. HRMS (ESI): calcd for  $\text{C}_{13}\text{H}_{14}\text{ClN}_2\text{O}_5$   $[\text{M}+\text{H}]^+$  313.0591; found 313.0578.

**(S)-Ethyl 2-amino-6,8-dibromo-4-(nitromethyl)-4H-chromene-3-carboxylate (5d):** Purified by column chromatography (petroleum ether/ethyl acetate = 10/1) to afford a white solid in 78% yield and 89% ee. The ee was determined by HPLC analysis using a Chiralpak AS-H column/AS-H column (16/1 hexane/*i*-PrOH; flow rate 1.0 mL/min;  $\lambda = 254$  nm;  $t_R = 69.6$  (major), 80.2 (minor) min).  $[\alpha]_D^{20} = 14.3$  ( $c = 0.88$ , EtOAc). Mp: 187–188°C. IR (KBr):  $\nu = 3458, 3318, 1678, 1614, 1572, 1541, 1520, 1454, 1400, 1385, 1344, 1315, 1279, 1248$   $\text{cm}^{-1}$ .  $^1\text{H}$  NMR (300 MHz,  $\text{CDCl}_3$ ):  $\delta = 7.65$  (d,  $J = 2.1$  Hz, 1H), 7.29 (d,  $J = 2.1$  Hz, 1H), 6.97–5.79 (br s, 2H), 4.62 (dd,  $J = 7.8, 4.2$  Hz, 1H), 4.51 (dd,  $J = 11.8, 4.3$  Hz, 1H), 4.41 (dd,  $J = 11.8, 7.9$  Hz, 1H), 4.25 (q,  $J = 7.2$  Hz, 2H), 1.34 (t,  $J = 7.2$  Hz, 3H) ppm.  $^{13}\text{C}$  NMR (75 MHz,  $\text{CDCl}_3$ ):  $\delta = 167.7, 161.3, 146.2, 135.0, 130.1, 125.2, 117.4, 111.2, 80.5, 72.7, 60.2, 34.4, 14.4$  ppm. HRMS (ESI): calcd for  $\text{C}_{13}\text{H}_{13}\text{Br}_2\text{N}_2\text{O}_5$   $[\text{M}+\text{H}]^+$

434.9191; found 434.9182.

**(S)-Ethyl 2-amino-6,8-dichloro-4-(nitromethyl)-4H-chromene-3-carboxylate (5e):** Purified by column chromatography (petroleum ether/ethyl acetate = 10/1) to afford a white solid in 81% yield and 77% ee. The ee was determined by HPLC analysis using a Chiralpak AS-H column/AS-H column (30/1 hexane/*i*-PrOH; flow rate 1.0 mL/min;  $\lambda$  = 254 nm;  $t_R$  = 115.5 (major), 132.3 (minor) min).  $[\alpha]_D^{20}$  = 30.7 ( $c$  = 1.08, EtOAc). Mp: 148–149°C. **IR** (KBr):  $\nu$  = 3468, 3316, 1678, 1616, 1582, 1541, 1460, 1404, 1387, 1317, 1279, 1252  $\text{cm}^{-1}$ .  **$^1\text{H}$  NMR** (300 MHz,  $\text{CDCl}_3$ ):  $\delta$  = 7.35 (d,  $J$  = 2.4 Hz, 1H), 7.10 (d,  $J$  = 2.4 Hz, 1H), 6.96–5.72 (br s, 2H), 4.62 (dd,  $J$  = 7.8, 4.2 Hz, 1H), 4.52 (dd,  $J$  = 11.8, 4.2 Hz, 1H), 4.41 (dd,  $J$  = 11.8, 7.9 Hz, 1H), 4.31–4.20 (m, 2H), 1.34 (t,  $J$  = 7.2 Hz, 3H) ppm.  **$^{13}\text{C}$  NMR** (75 MHz,  $\text{CDCl}_3$ ):  $\delta$  = 167.7, 161.3, 144.7, 129.8, 129.4, 126.5, 124.9, 122.5, 80.5, 72.5, 60.2, 34.4, 14.4 ppm. **HRMS** (ESI): calcd for  $\text{C}_{13}\text{H}_{13}\text{Cl}_2\text{N}_2\text{O}_5$   $[\text{M}+\text{H}]^+$  347.0201; found 347.0190.

**(S)-Ethyl 2-amino-6-methoxy-4-(nitromethyl)-4H-chromene-3-carboxylate (5f):** Purified by column chromatography (petroleum ether/ethyl acetate = 10/1) to afford a white solid in 86% yield and 77% ee. The ee was determined by HPLC analysis using a Chiralcel OJ-H column/OJ-H column (2/1 hexane/*i*-PrOH; flow rate 1.0 mL/min;  $\lambda$  = 254 nm;  $t_R$  = 45.4 (major), 55.7 (minor) min).  $[\alpha]_D^{20}$  = 63.9 ( $c$  = 0.97, EtOAc). Mp: 109–110°C. **IR** (KBr):  $\nu$  = 3422, 3292, 2982, 1674, 1620, 1597, 1547, 1491, 1414, 1379, 1344, 1292, 1271, 1221  $\text{cm}^{-1}$ .  **$^1\text{H}$  NMR** (300 MHz,  $\text{CDCl}_3$ ):  $\delta$  = 6.94 (d,  $J$  = 9.0 Hz, 1H), 6.80 (dd,  $J$  = 9.0, 3.0 Hz, 1H), 6.68 (d,  $J$  = 3.0 Hz, 1H), 6.62–5.99 (br s, 2H), 4.62 (dd,  $J$  = 8.0, 4.4 Hz, 1H), 4.53 (dd,  $J$  = 11.4, 4.4 Hz, 1H), 4.39 (dd,  $J$  = 11.3, 8.0 Hz, 1H), 4.29–4.18 (m, 2H), 3.76 (s, 3H), 1.34 (t,  $J$  = 7.2 Hz, 3H) ppm.  **$^{13}\text{C}$  NMR** (75 MHz,  $\text{CDCl}_3$ ):  $\delta$  = 168.2, 162.1, 156.3, 143.6, 122.3, 116.9, 114.7, 112.0, 80.9, 72.3, 59.7, 55.5, 34.5, 14.3 ppm. **HRMS** (ESI): calcd for  $\text{C}_{14}\text{H}_{17}\text{N}_2\text{O}_6$   $[\text{M}+\text{H}]^+$  309.1086; found 309.1080.

**(S)-Ethyl 2-amino-5,7-dichloro-4-(nitromethyl)-4H-chromene-3-carboxylate (5g):** Purified by column

chromatography (petroleum ether/ethyl acetate = 4/1) to afford a white solid in 76% yield and 87% ee. The ee was determined by HPLC analysis using a Chiralcel AS-H column (40/1 hexane/*i*-PrOH; flow rate 1.0 mL/min;  $\lambda$  = 254 nm;  $t_R$  = 24.9 (major), 21.1 (minor) min).  $[\alpha]_D^{20}$  = 73.5 (*c* = 0.49, EtOAc). Mp: 105–106°C. **IR** (KBr):  $\nu$  = 3443, 3312, 2982, 1682, 1633, 1603, 1550, 1520, 1462, 1408, 1379, 1301, 1261, 1219 cm<sup>-1</sup>. **<sup>1</sup>H NMR** (300 MHz, CDCl<sub>3</sub>):  $\delta$  = 7.25 (d, *J* = 2.0 Hz, 1H), 6.99 (d, *J* = 2.0 Hz, 1H), 6.80–5.90 (br s, 2H), 4.73–4.63 (m, 2H), 4.42–4.18 (m, 2H), 1.34 (t, *J* = 7.1 Hz, 3H) ppm. **<sup>13</sup>C NMR** (75 MHz, CDCl<sub>3</sub>):  $\delta$  = 167.8, 161.2, 151.6, 134.4, 133.4, 125.6, 118.9, 115.8, 78.3, 72.6, 60.2, 32.8, 14.5 ppm. **HRMS** (ESI): calcd for C<sub>13</sub>H<sub>13</sub>N<sub>2</sub>O<sub>5</sub>Cl<sub>2</sub> [M+H]<sup>+</sup> 347.0201; found 347.0196.

**(S)-Ethyl 2-amino-5-methoxy-4-(nitromethyl)-4H-chromene-3-carboxylate (5h)**: Purified by column chromatography (petroleum ether/ethyl acetate = 6/1) to afford a yellow solid in 41% yield and 61% ee. The ee was determined by HPLC analysis using a Chiralcel AS-H column (16/1 hexane/*i*-PrOH; flow rate 1.0 mL/min;  $\lambda$  = 254 nm;  $t_R$  = 54.8 (major), 43.2 (minor) min).  $[\alpha]_D^{20}$  = 35.9 (*c* = 0.58, EtOAc). Mp: 104–105°C. **IR** (KBr):  $\nu$  = 3441, 3308, 2982, 1682, 1643, 1545, 1524, 1470, 1439, 1283, 1223, 1202, 1097, 1070 cm<sup>-1</sup>. **<sup>1</sup>H NMR** (300 MHz, CDCl<sub>3</sub>):  $\delta$  = 7.22 (t, *J* = 8.3 Hz, 1H), 6.67 (d, *J* = 8.3 Hz, 1H), 6.63 (d, *J* = 8.3 Hz, 1H), 4.68–4.58 (m, 3H), 4.32–4.15 (m, 2H), 3.88 (s, 3H), 1.34 (t, *J* = 7.1 Hz, 3H) ppm. **<sup>13</sup>C NMR** (75 MHz, CDCl<sub>3</sub>):  $\delta$  = 168.6, 161.8, 156.6, 151.0, 128.9, 110.3, 108.7, 106.0, 79.2, 73.1, 59.8, 55.7, 30.3, 14.5 ppm. **HRMS** (ESI): calcd for C<sub>14</sub>H<sub>17</sub>N<sub>2</sub>O<sub>6</sub> [M+H]<sup>+</sup> 309.1086; found 309.1084.

**2-(2-Amino-3-cyano-4H-chromen-4-yl)malononitrile (6a)**: **<sup>1</sup>H NMR** (300 MHz, DMSO-*d*<sub>6</sub>):  $\delta$  = 7.50 (s, 2H), 7.47–7.40 (m, 2H), 7.33–7.23 (m, 1H), 7.17–7.10 (m, 1H), 5.06 (d, *J* = 3.9 Hz, 1H), 4.59 (d, *J* = 3.9 Hz, 1H) ppm. **<sup>13</sup>C NMR** (75 MHz, DMSO-*d*<sub>6</sub>):  $\delta$  = 163.9, 150.2, 130.7, 129.4, 125.5, 119.8, 118.5, 116.9, 113.6, 113.4, 49.4, 37.6, 32.9 ppm.

**Ethyl 2-amino-4-(1-cyano-2-ethoxy-2-oxoethyl)-4H-chromene-3-carboxylate (6b)**: **<sup>1</sup>H NMR** (300 MHz,

CDCl<sub>3</sub>):  $\delta$  = 7.31–7.27 (m, 1H), 7.12–7.05 (m, 3H), 6.81–5.90 (br s, 2H), 4.72 (d,  $J$  = 3.0 Hz, 1H), 4.30–4.22 (m, 4H), 3.98 (d,  $J$  = 3.0 Hz, 1H), 1.35 (t,  $J$  = 7.2 Hz, 3H), 1.28 (t,  $J$  = 7.2 Hz, 3H) ppm. **<sup>13</sup>C NMR** (75 MHz, CDCl<sub>3</sub>):  $\delta$  = 168.1, 165.2, 162.6, 150.6, 129.4, 128.3, 124.8, 120.3, 116.7, 115.6, 73.6, 62.8, 60.0, 46.8, 37.0, 14.6, 14.1 ppm.

**2-Imino-2H-chromene-3-carbonitrile (Ia):** **<sup>1</sup>H NMR** (300 MHz, CDCl<sub>3</sub>):  $\delta$  = 8.29 (s, 1H), 7.77–7.71 (m, 1H), 7.65–7.60 (m, 1H), 7.46–7.39 (m, 2H) ppm. **<sup>13</sup>C NMR** (75 MHz, CDCl<sub>3</sub>):  $\delta$  = 156.4, 154.6, 151.8, 135.6, 129.3, 125.7, 117.5, 117.1, 113.5, 103.4 ppm.

**Ethyl 2-imino-2H-chromene-3-carboxylate (Ib):** **<sup>1</sup>H NMR** (300 MHz, CDCl<sub>3</sub>):  $\delta$  = 8.53 (s, 1H), 7.70–7.60 (m, 2H), 7.40–7.28 (m, 2H), 4.42 (q,  $J$  = 7.2 Hz, 2H), 1.42 (t,  $J$  = 7.2 Hz, 3H) ppm. **<sup>13</sup>C NMR** (75 MHz, CDCl<sub>3</sub>):  $\delta$  = 163.1, 156.7, 155.2, 148.5, 134.3, 129.5, 124.8, 118.4, 117.9, 116.8, 62.0, 14.2 ppm.

# <sup>1</sup>H, <sup>13</sup>C NMR Spectra

## Compound 4a

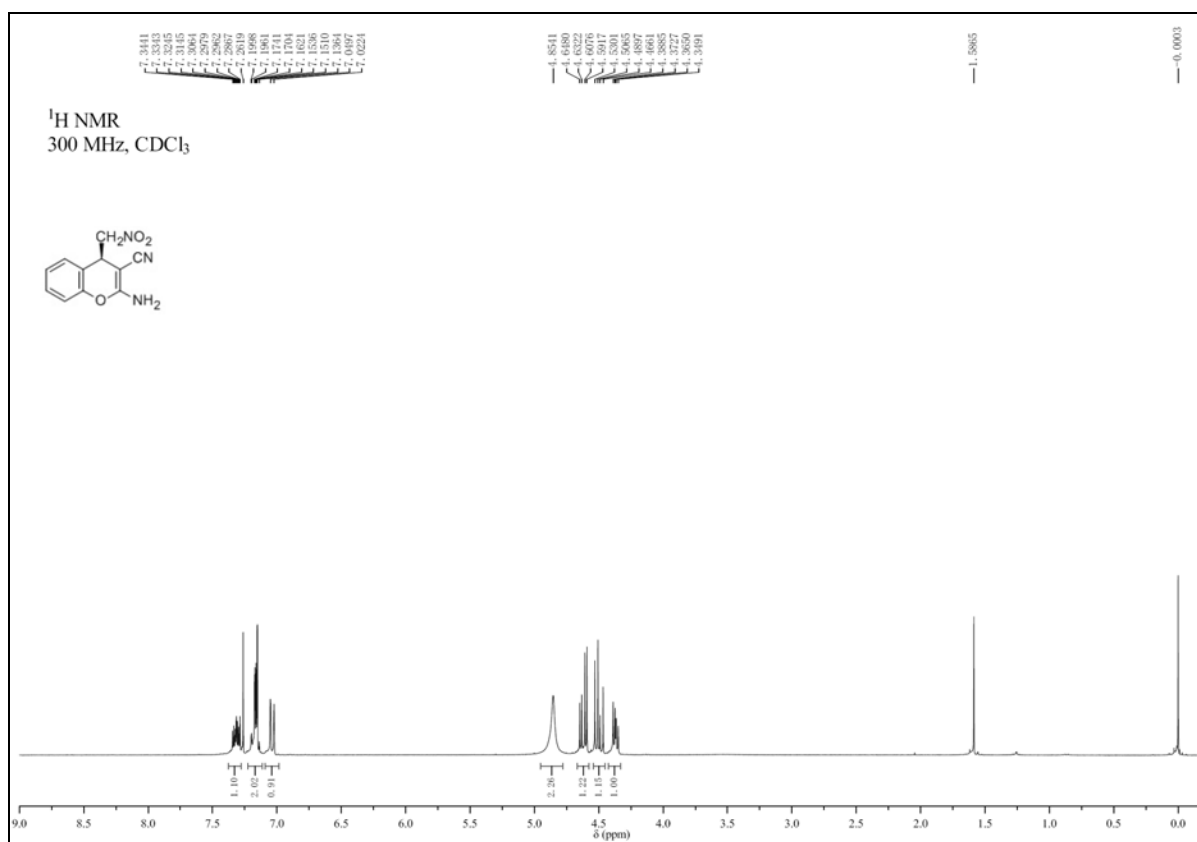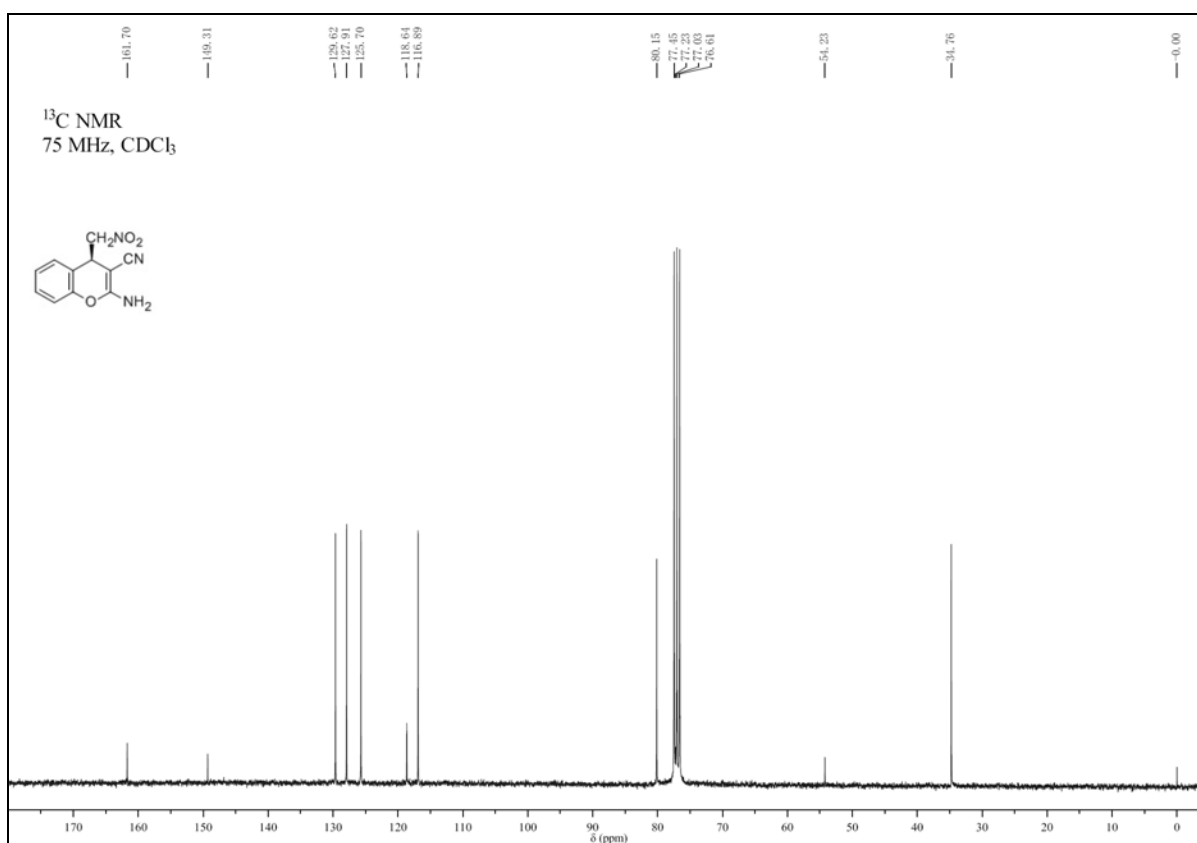

Compound **4b**

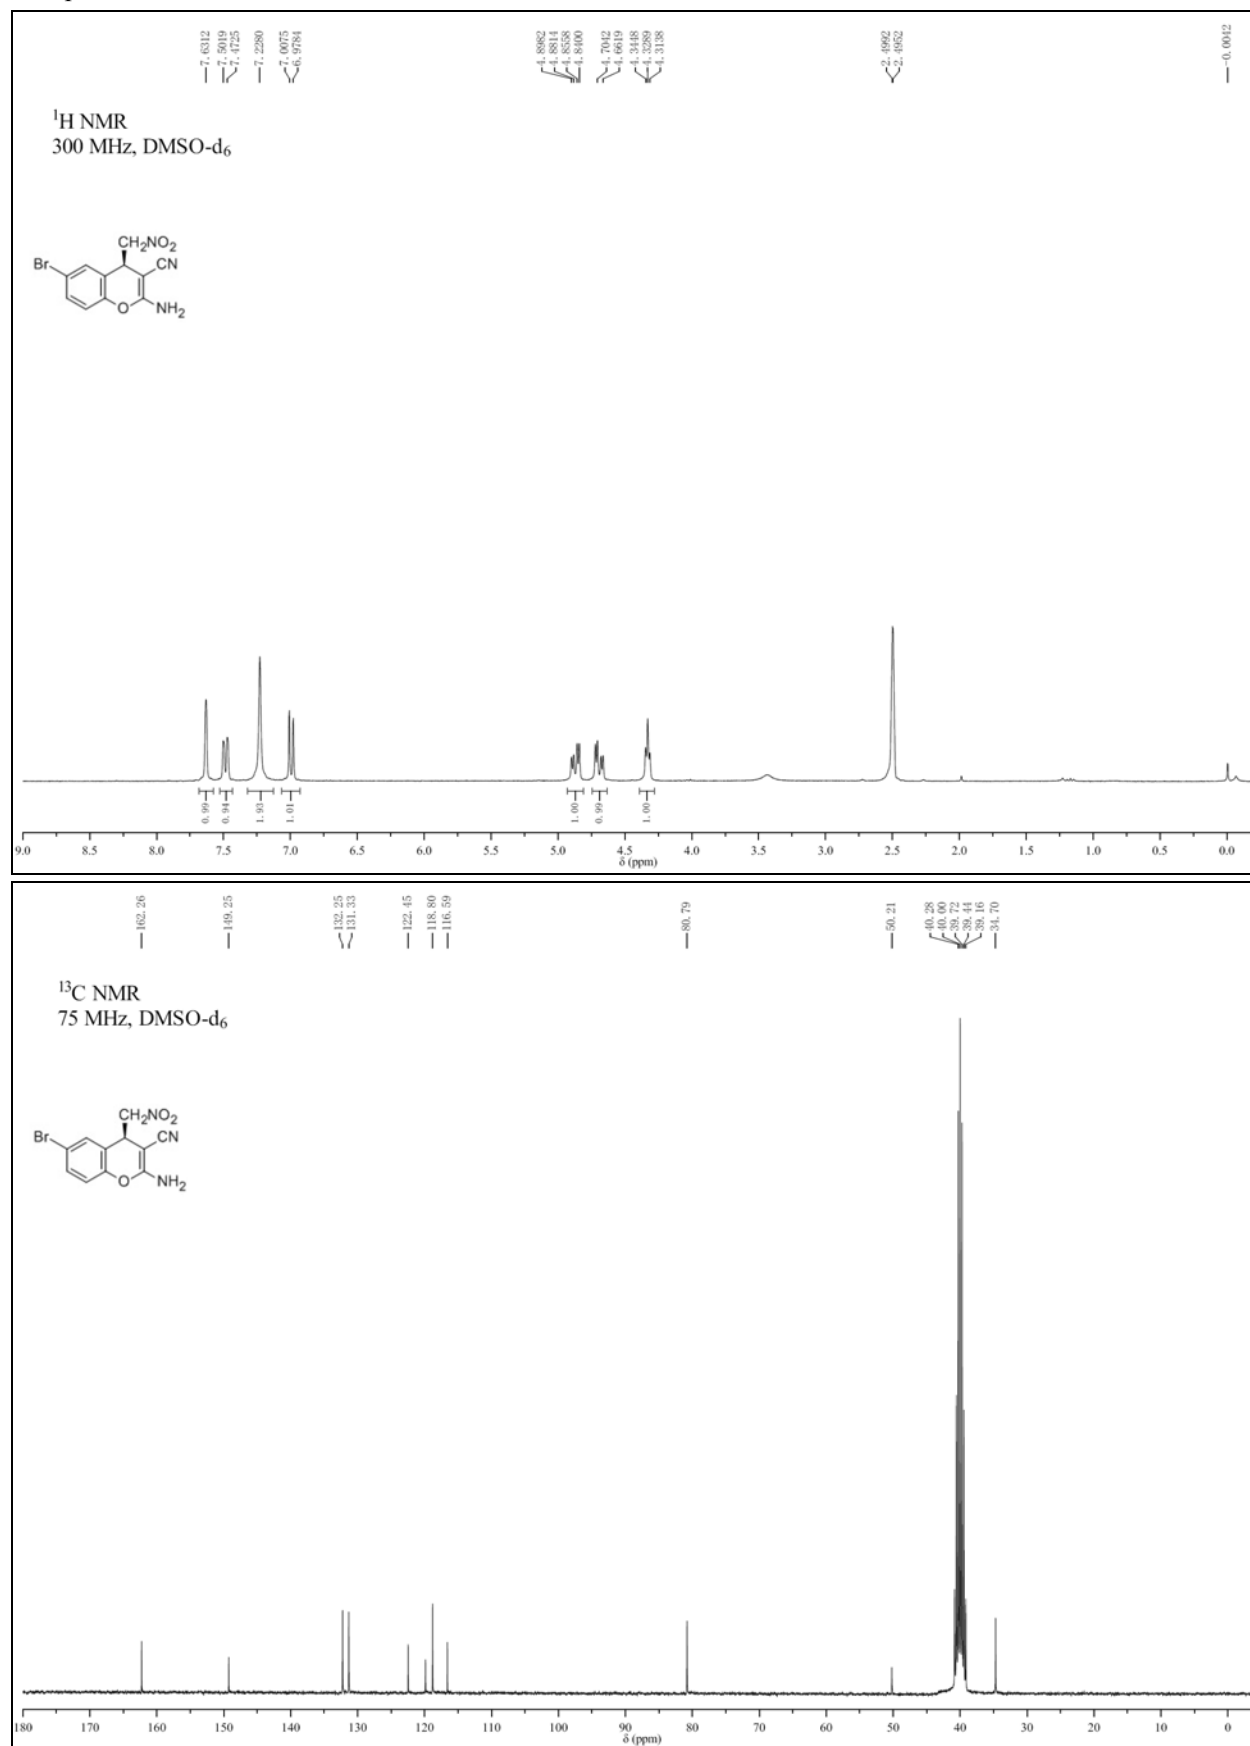

Compound **4c**

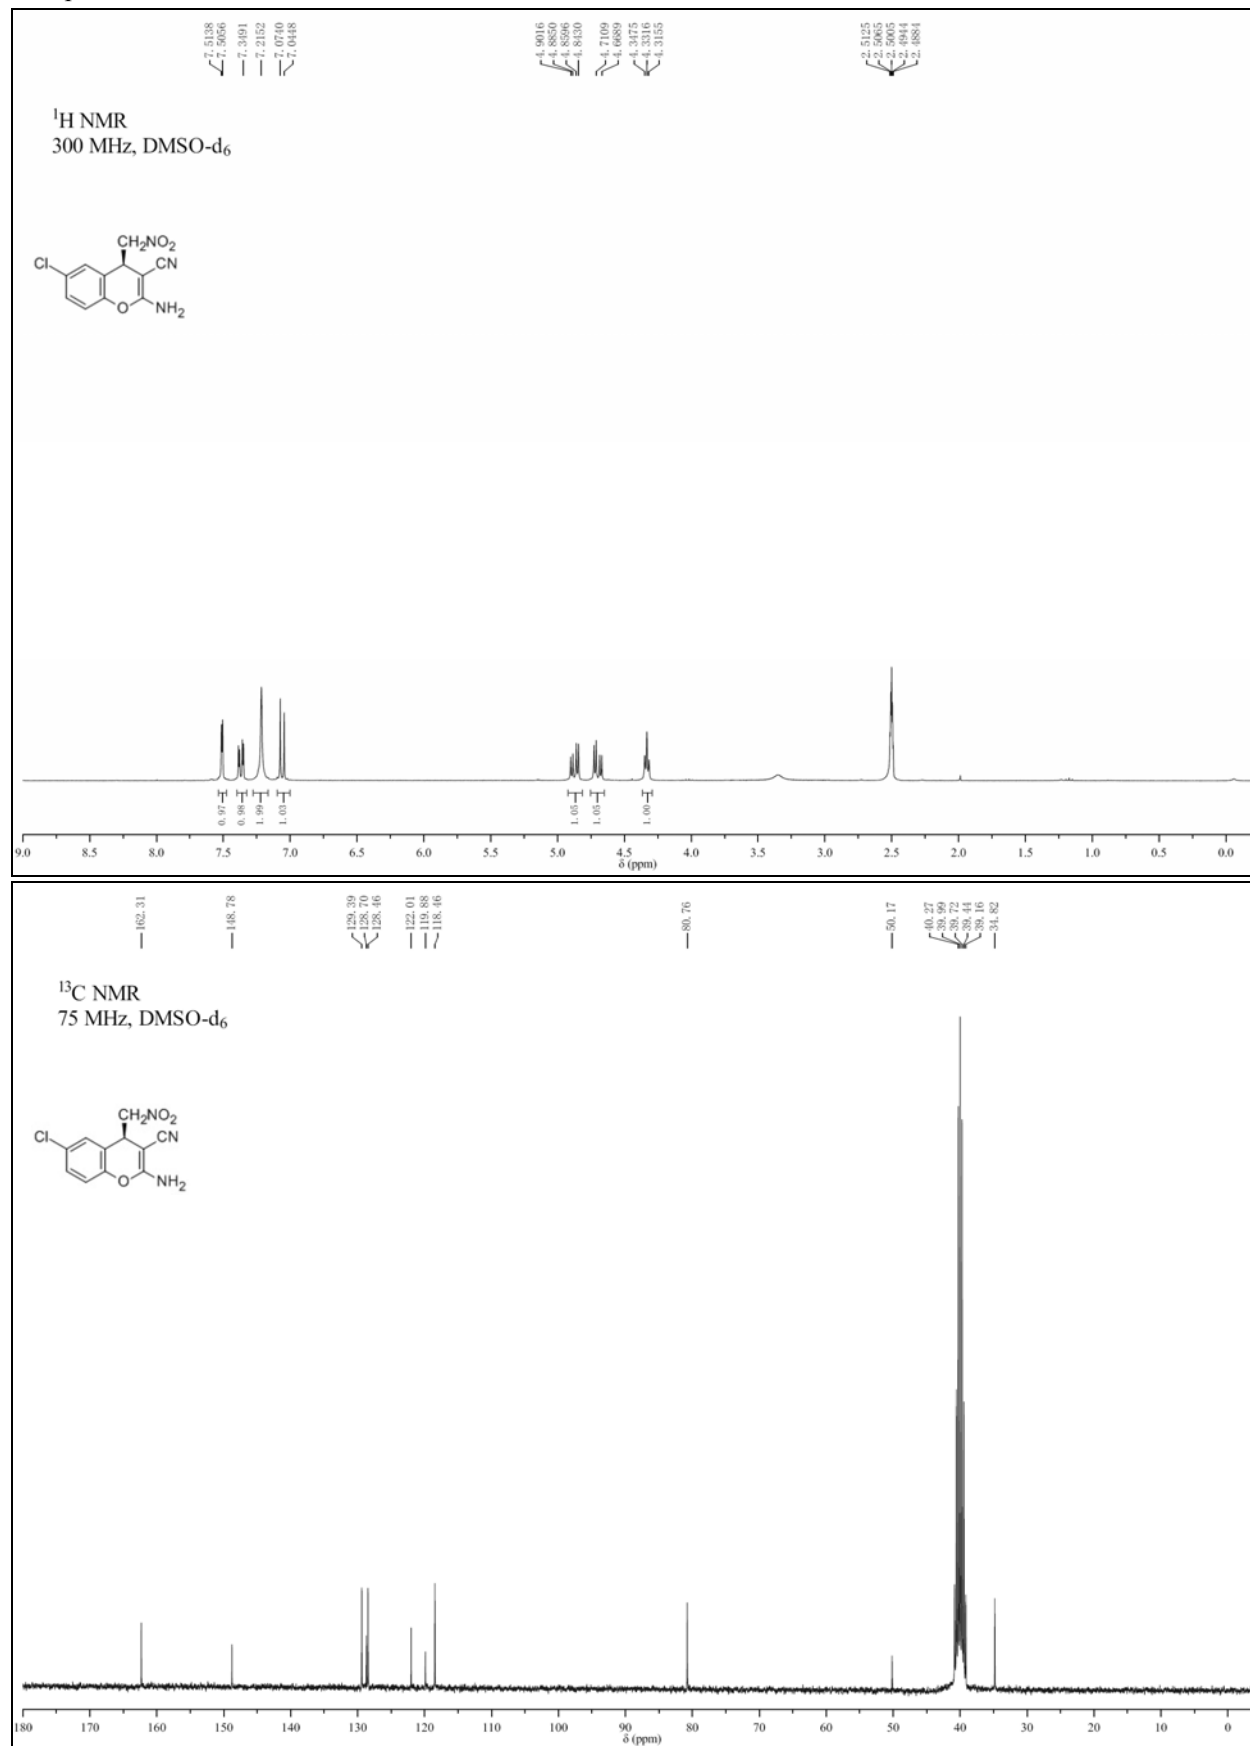



Compound **4d**

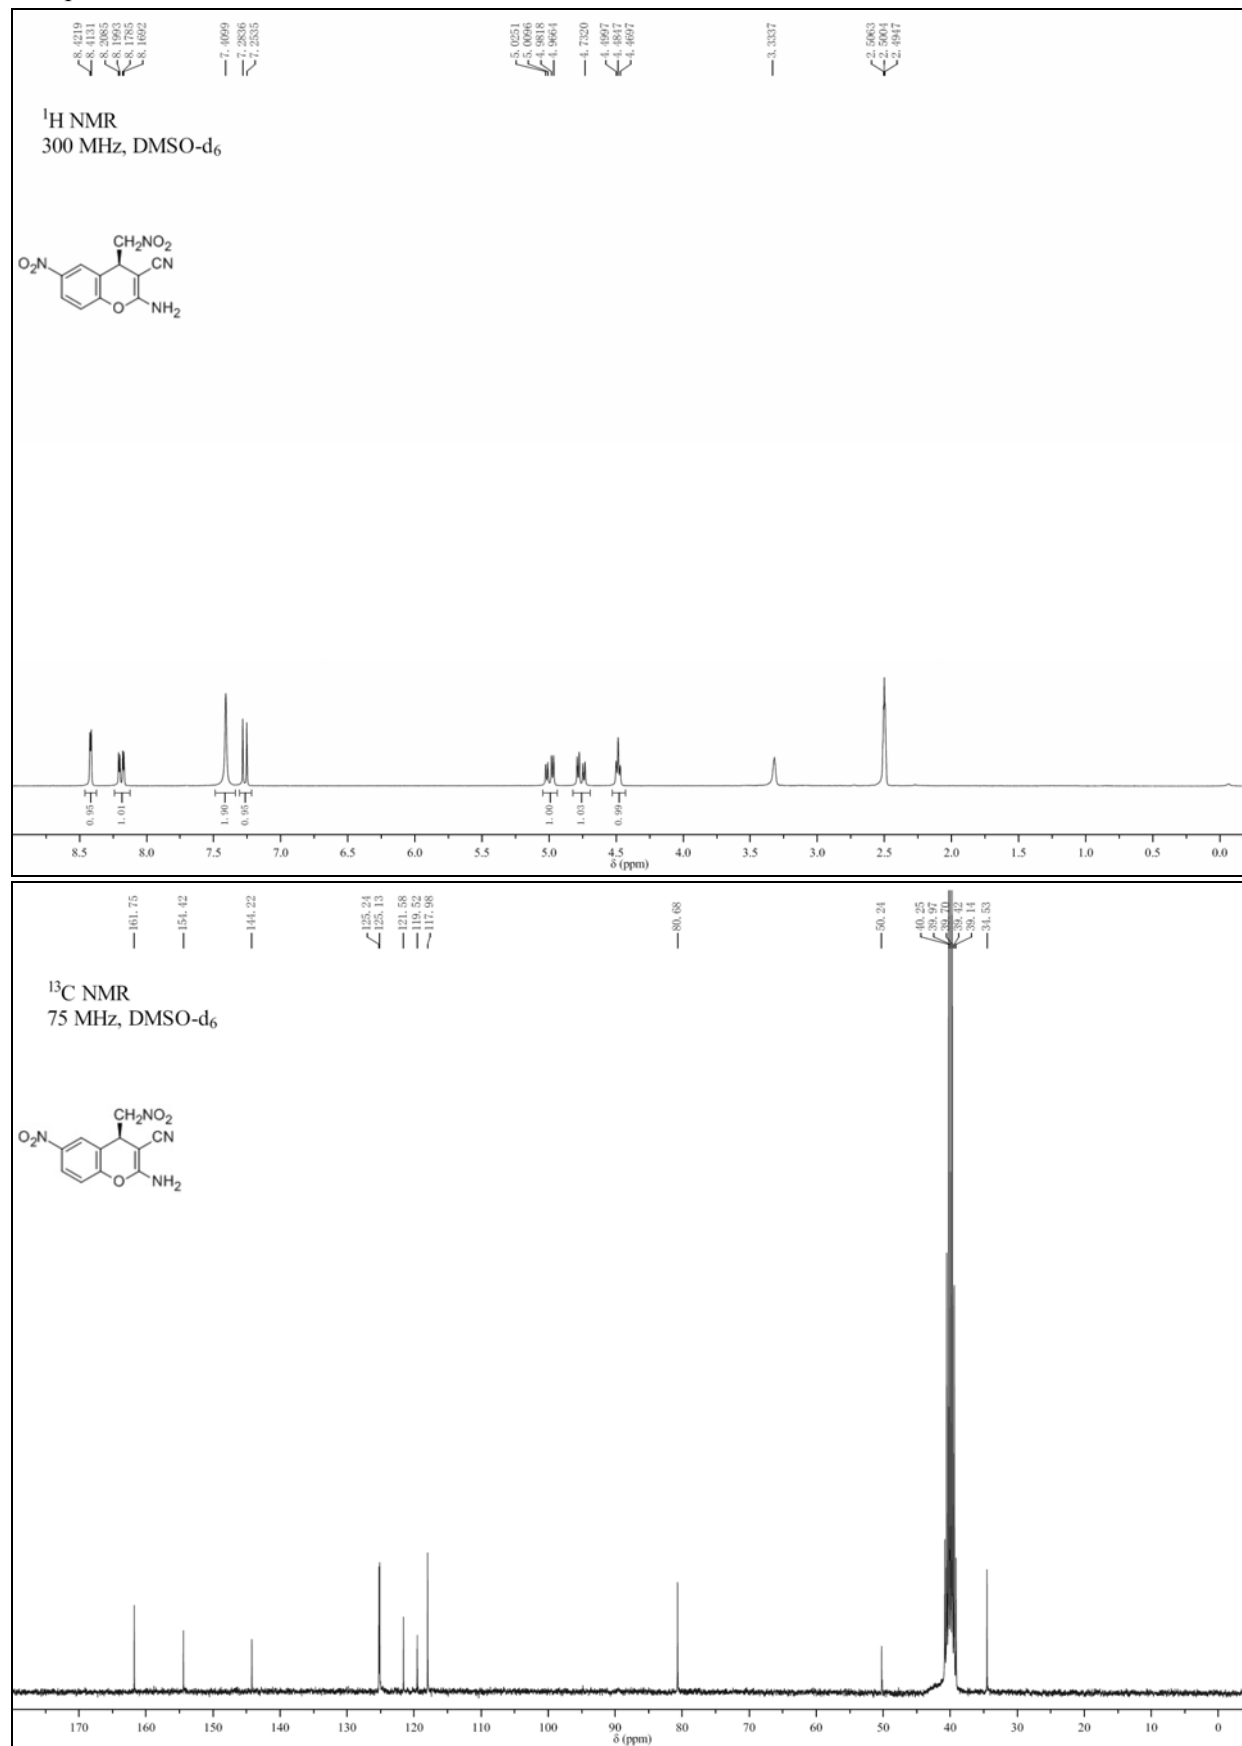

Compound **4e**

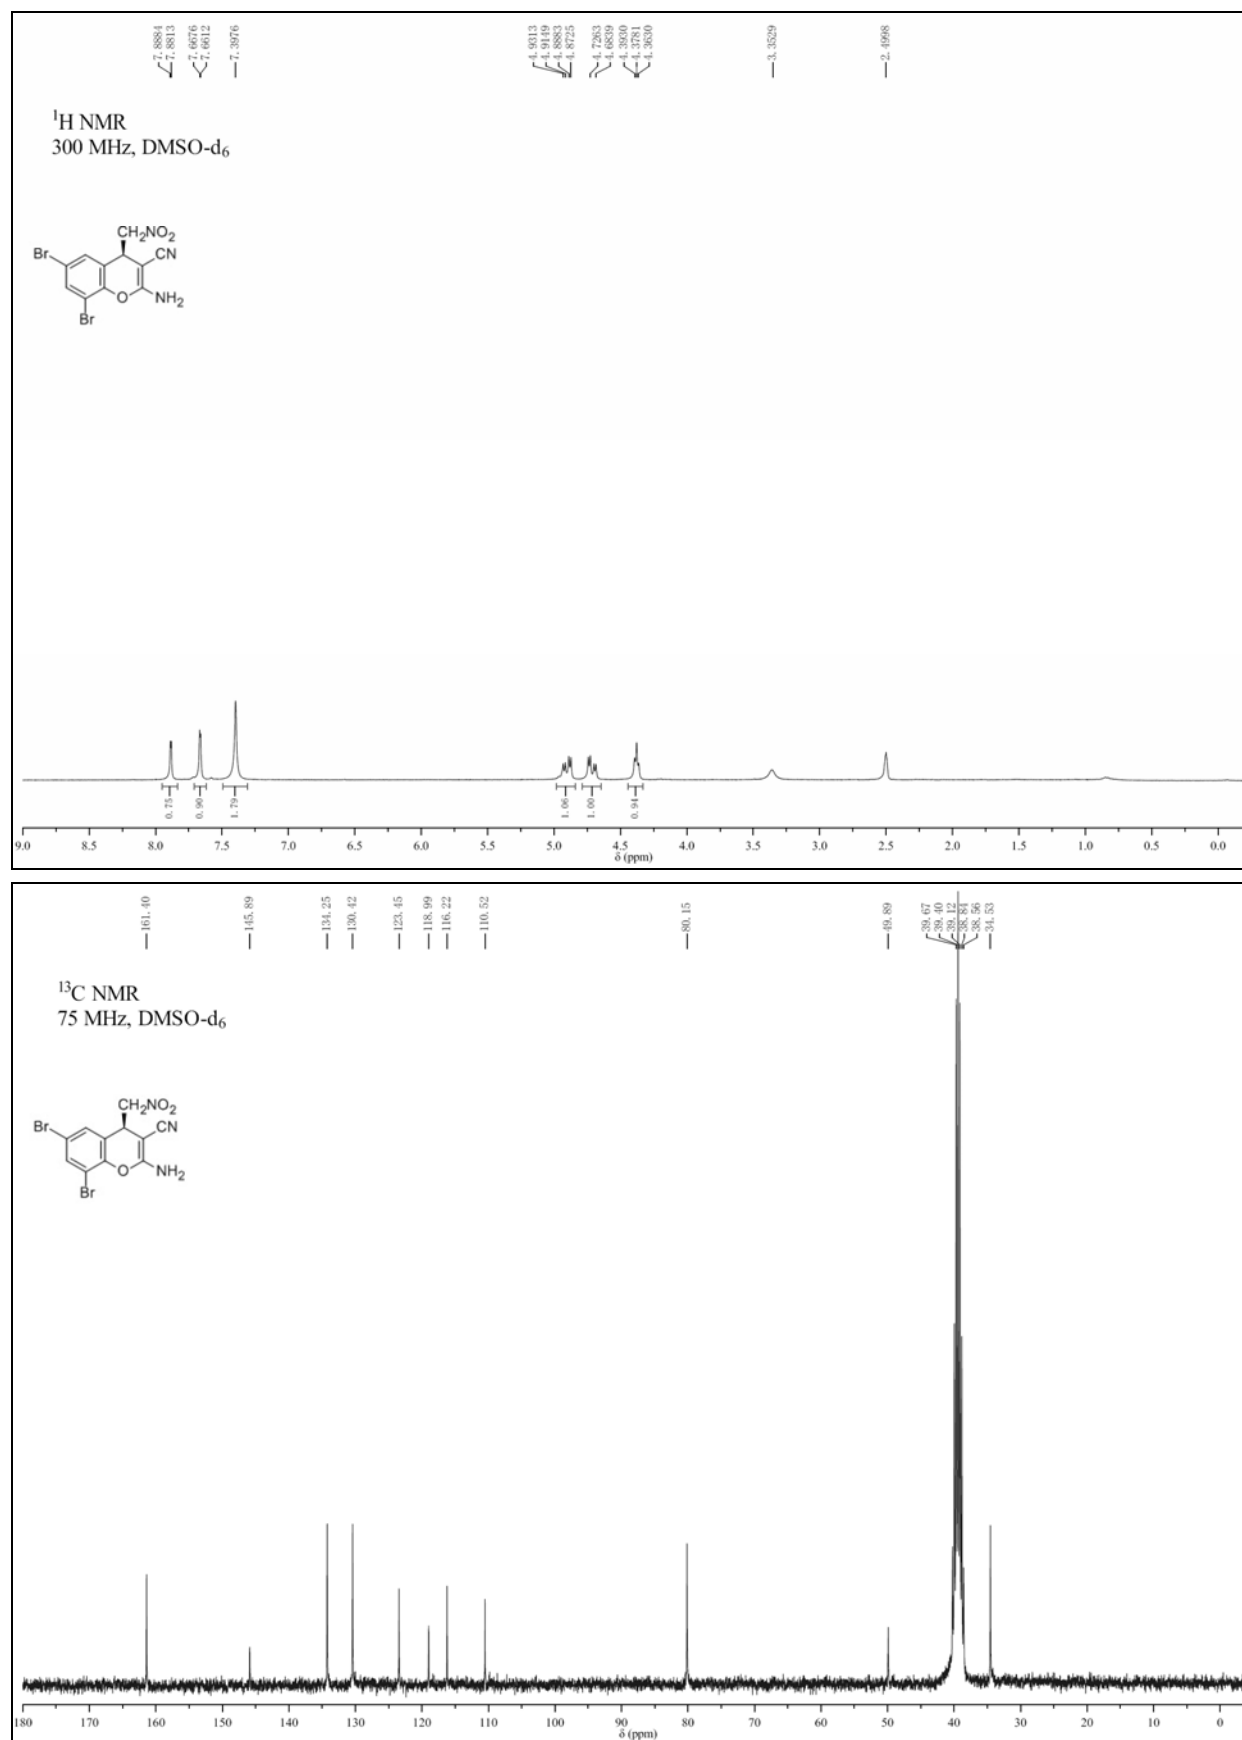

Compound **4f**

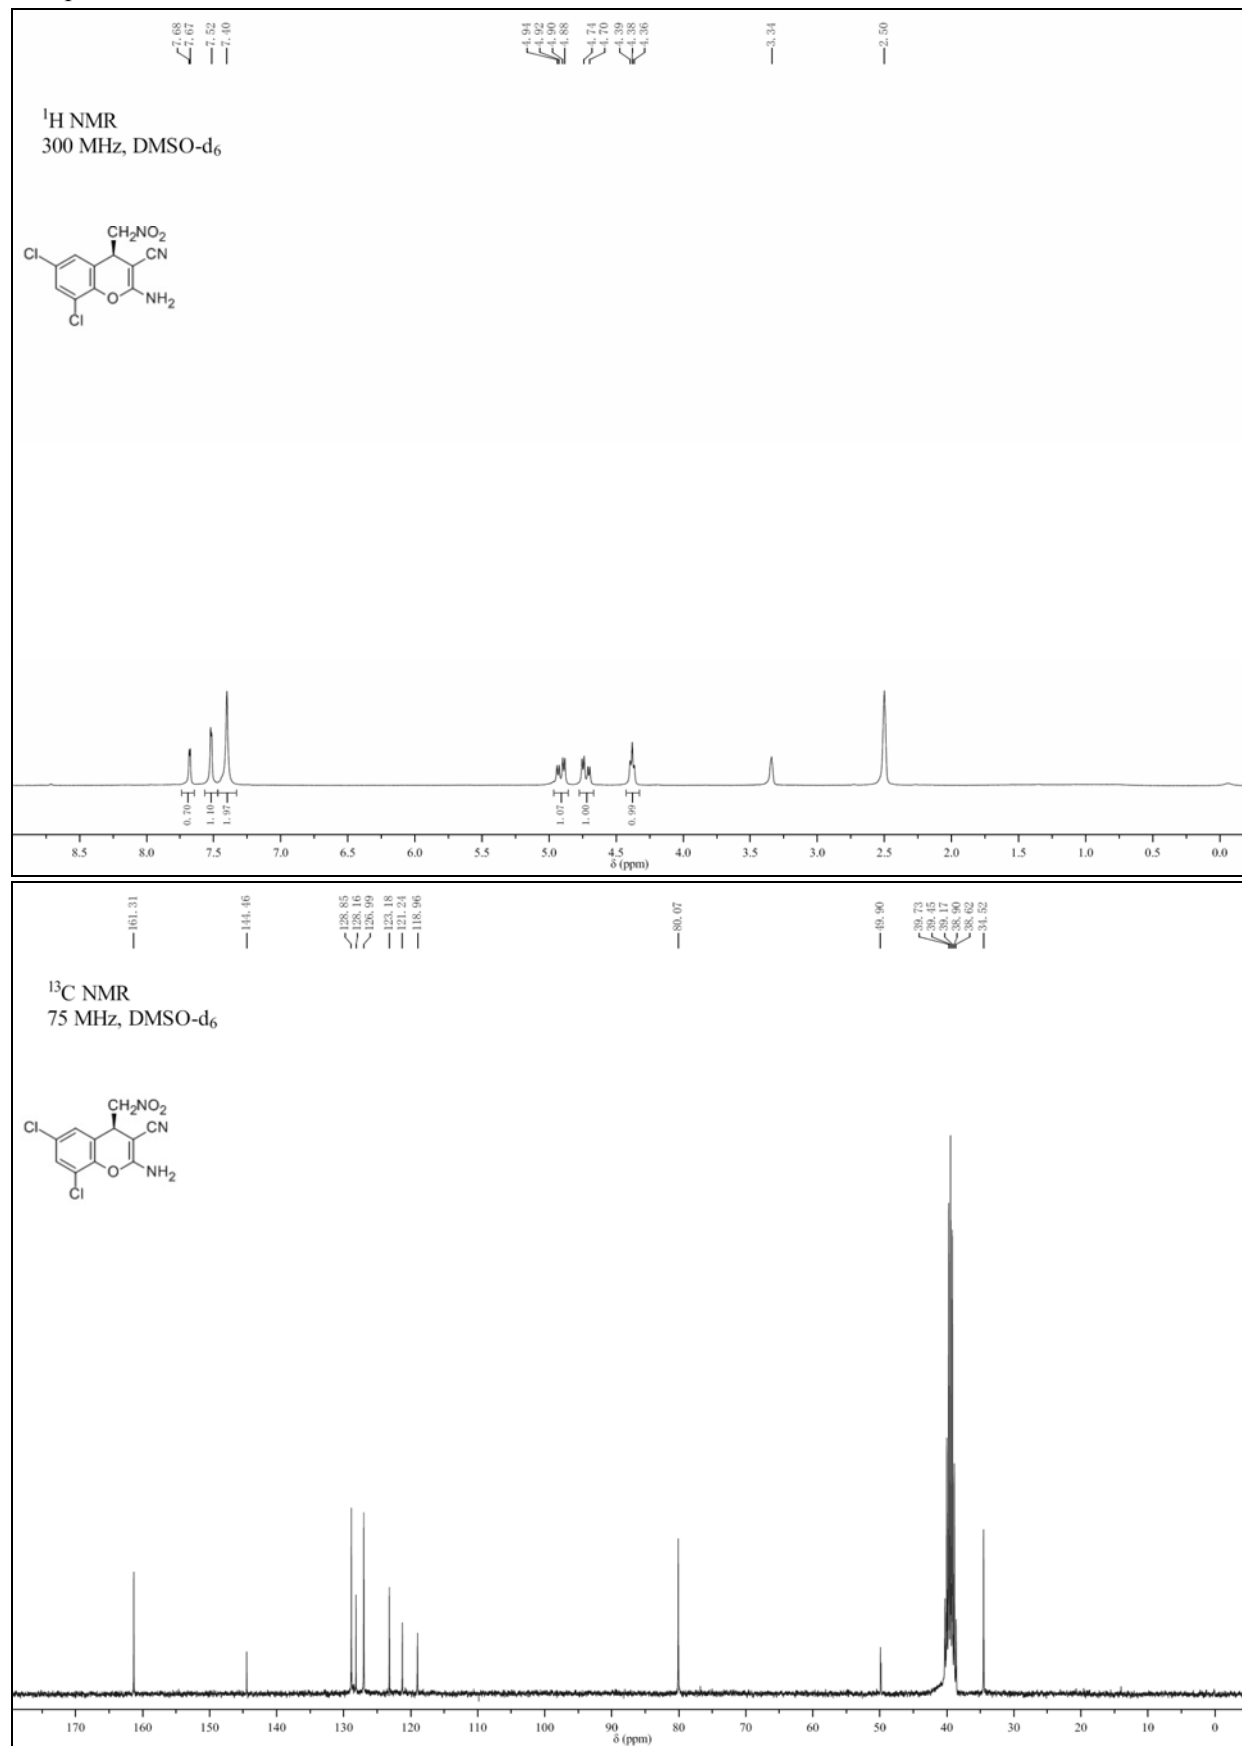

Compound **4g**

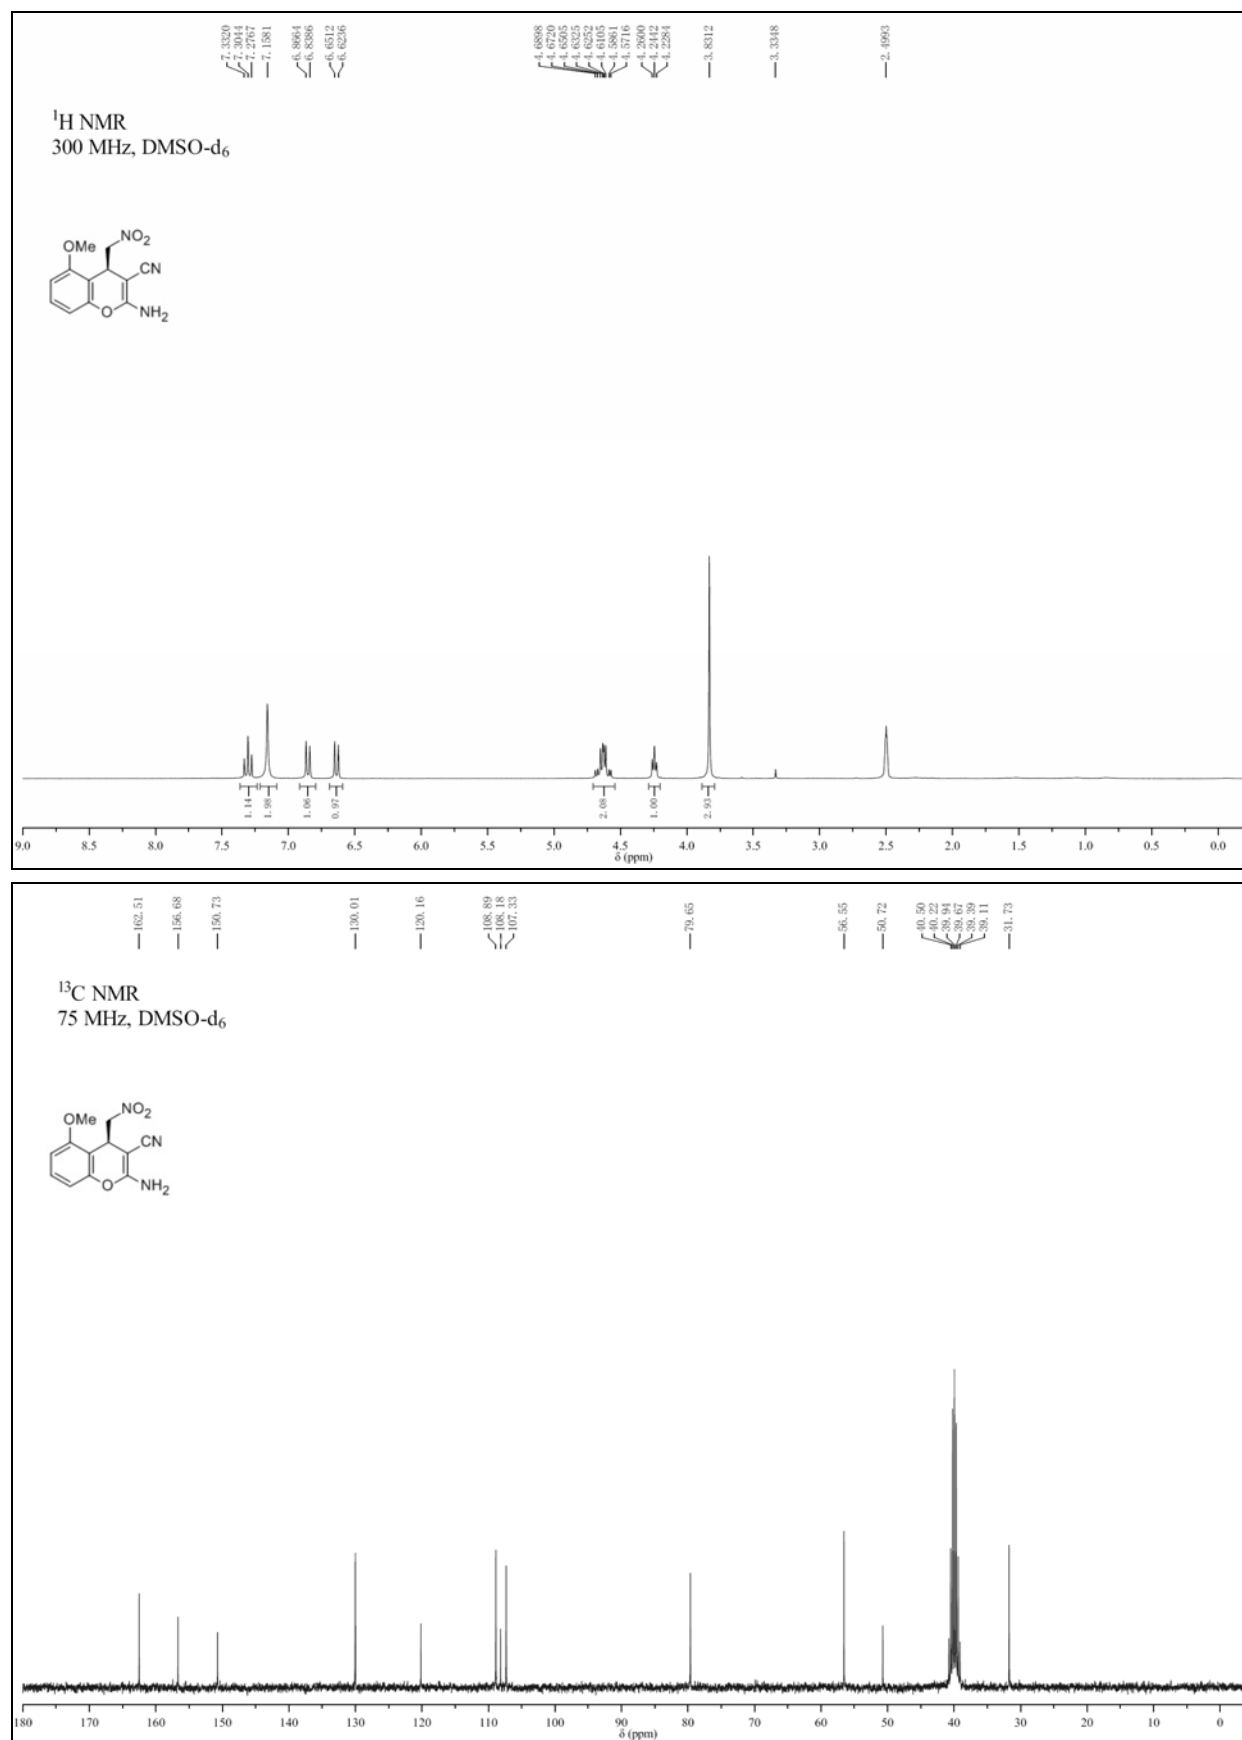

Compound **4h**

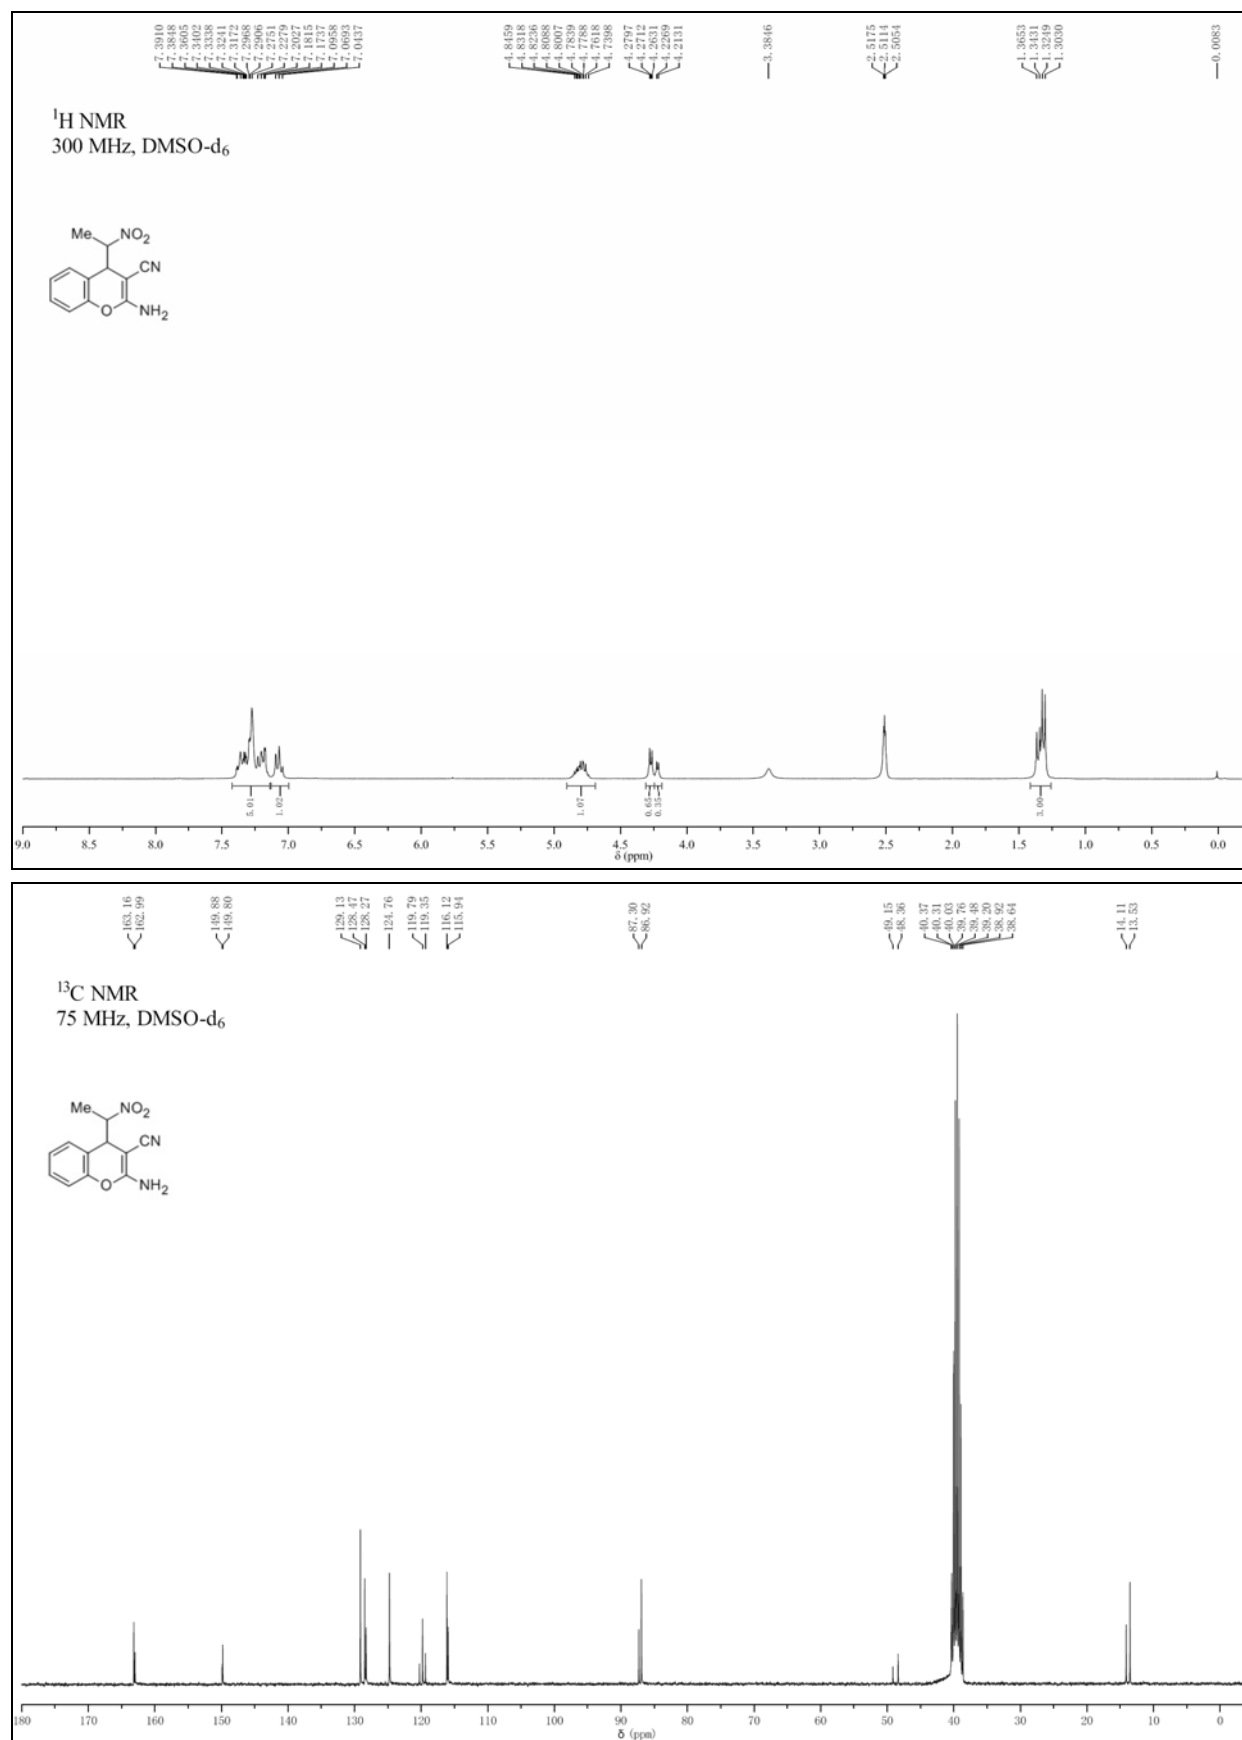

Compound **5a**

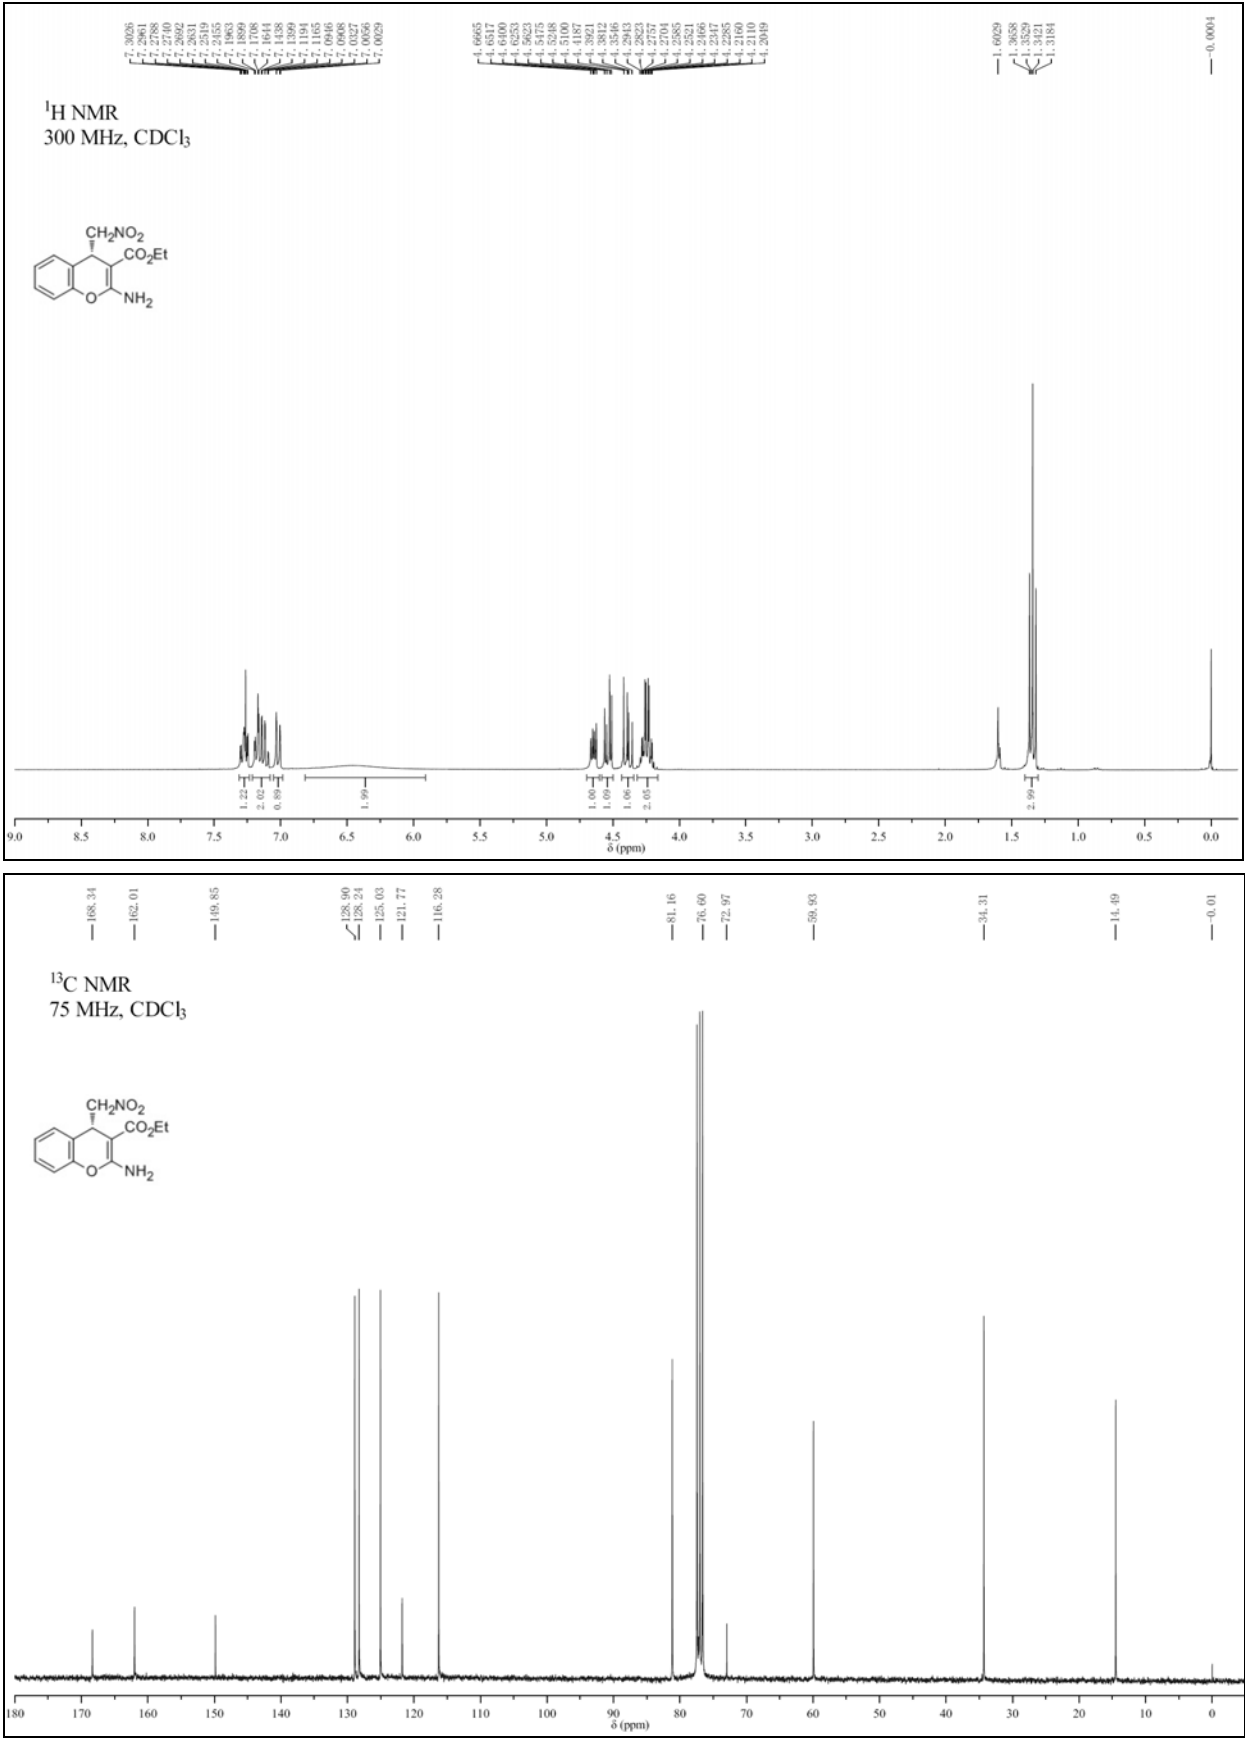

Compound **5b**

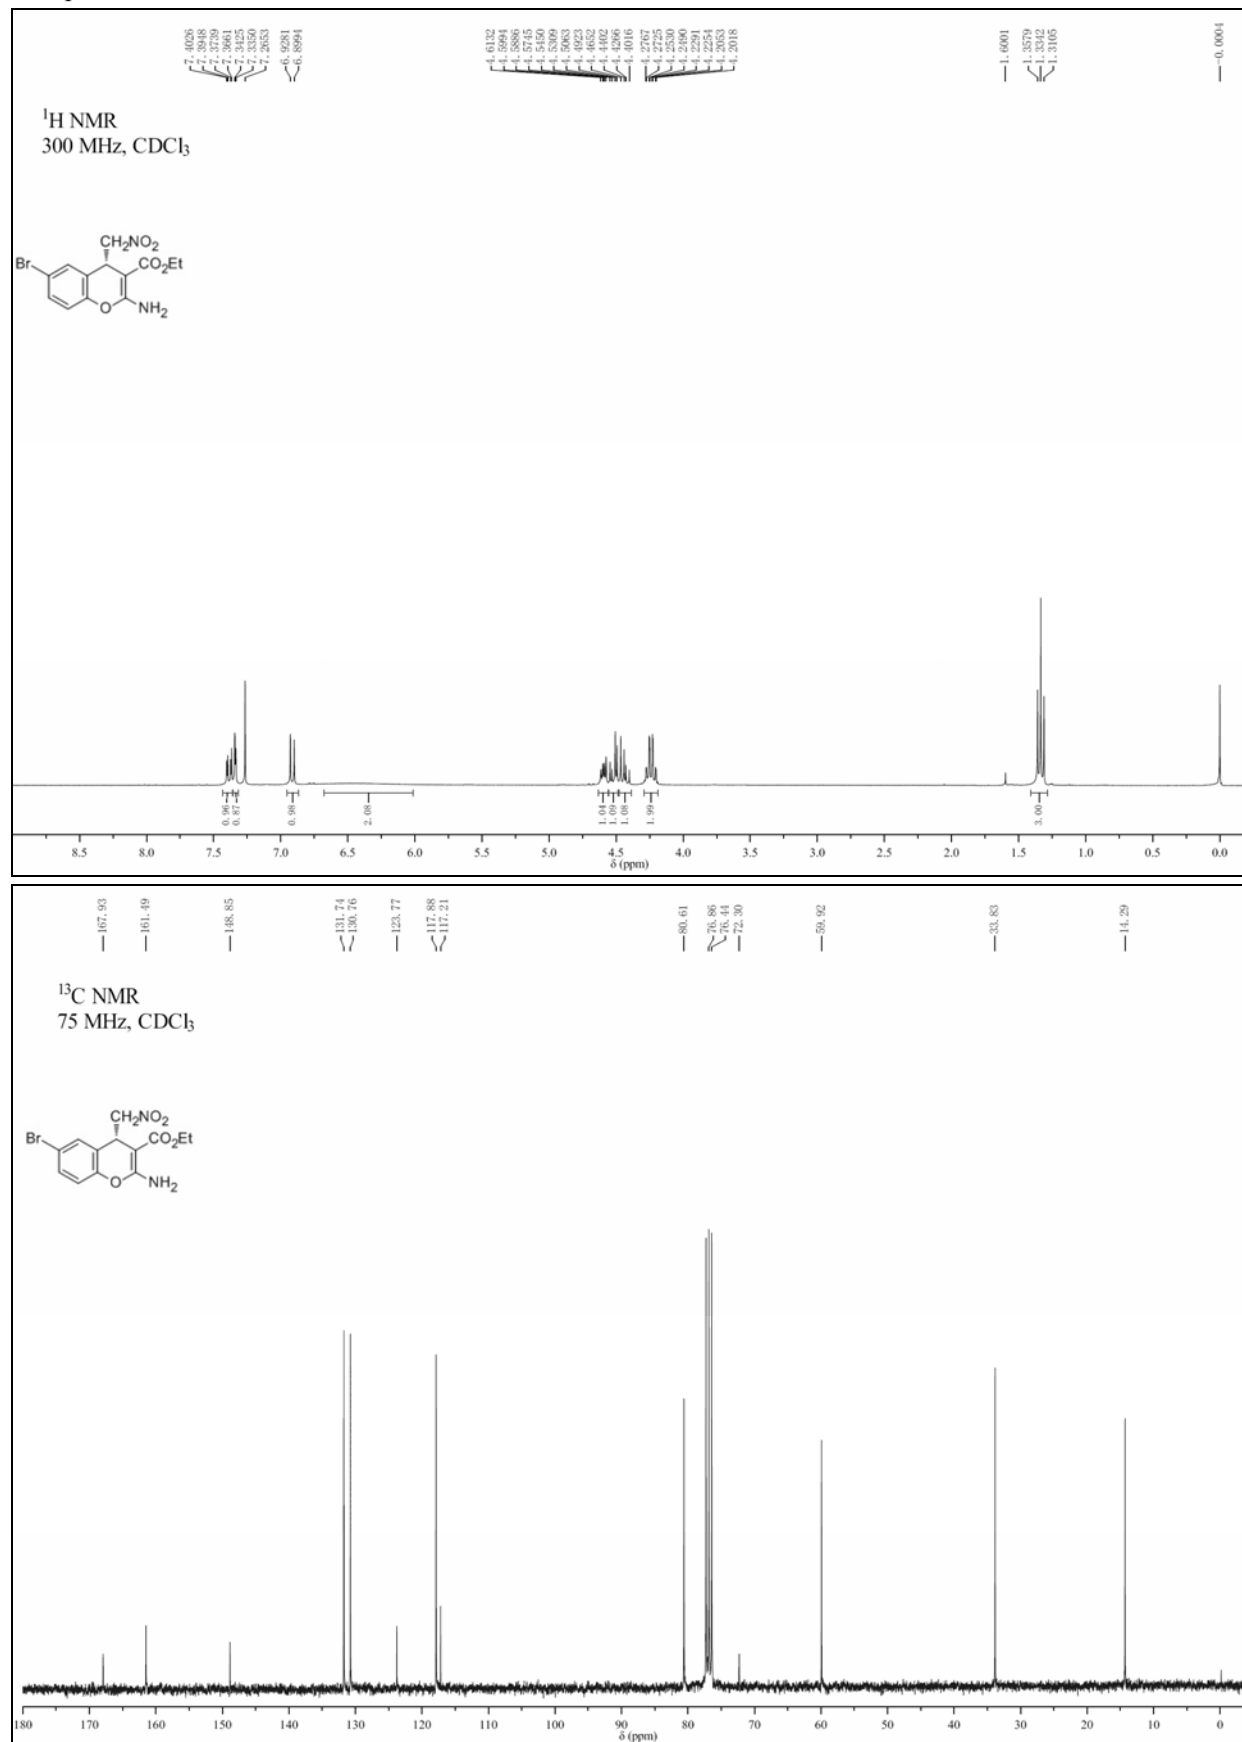

Compound **5c**

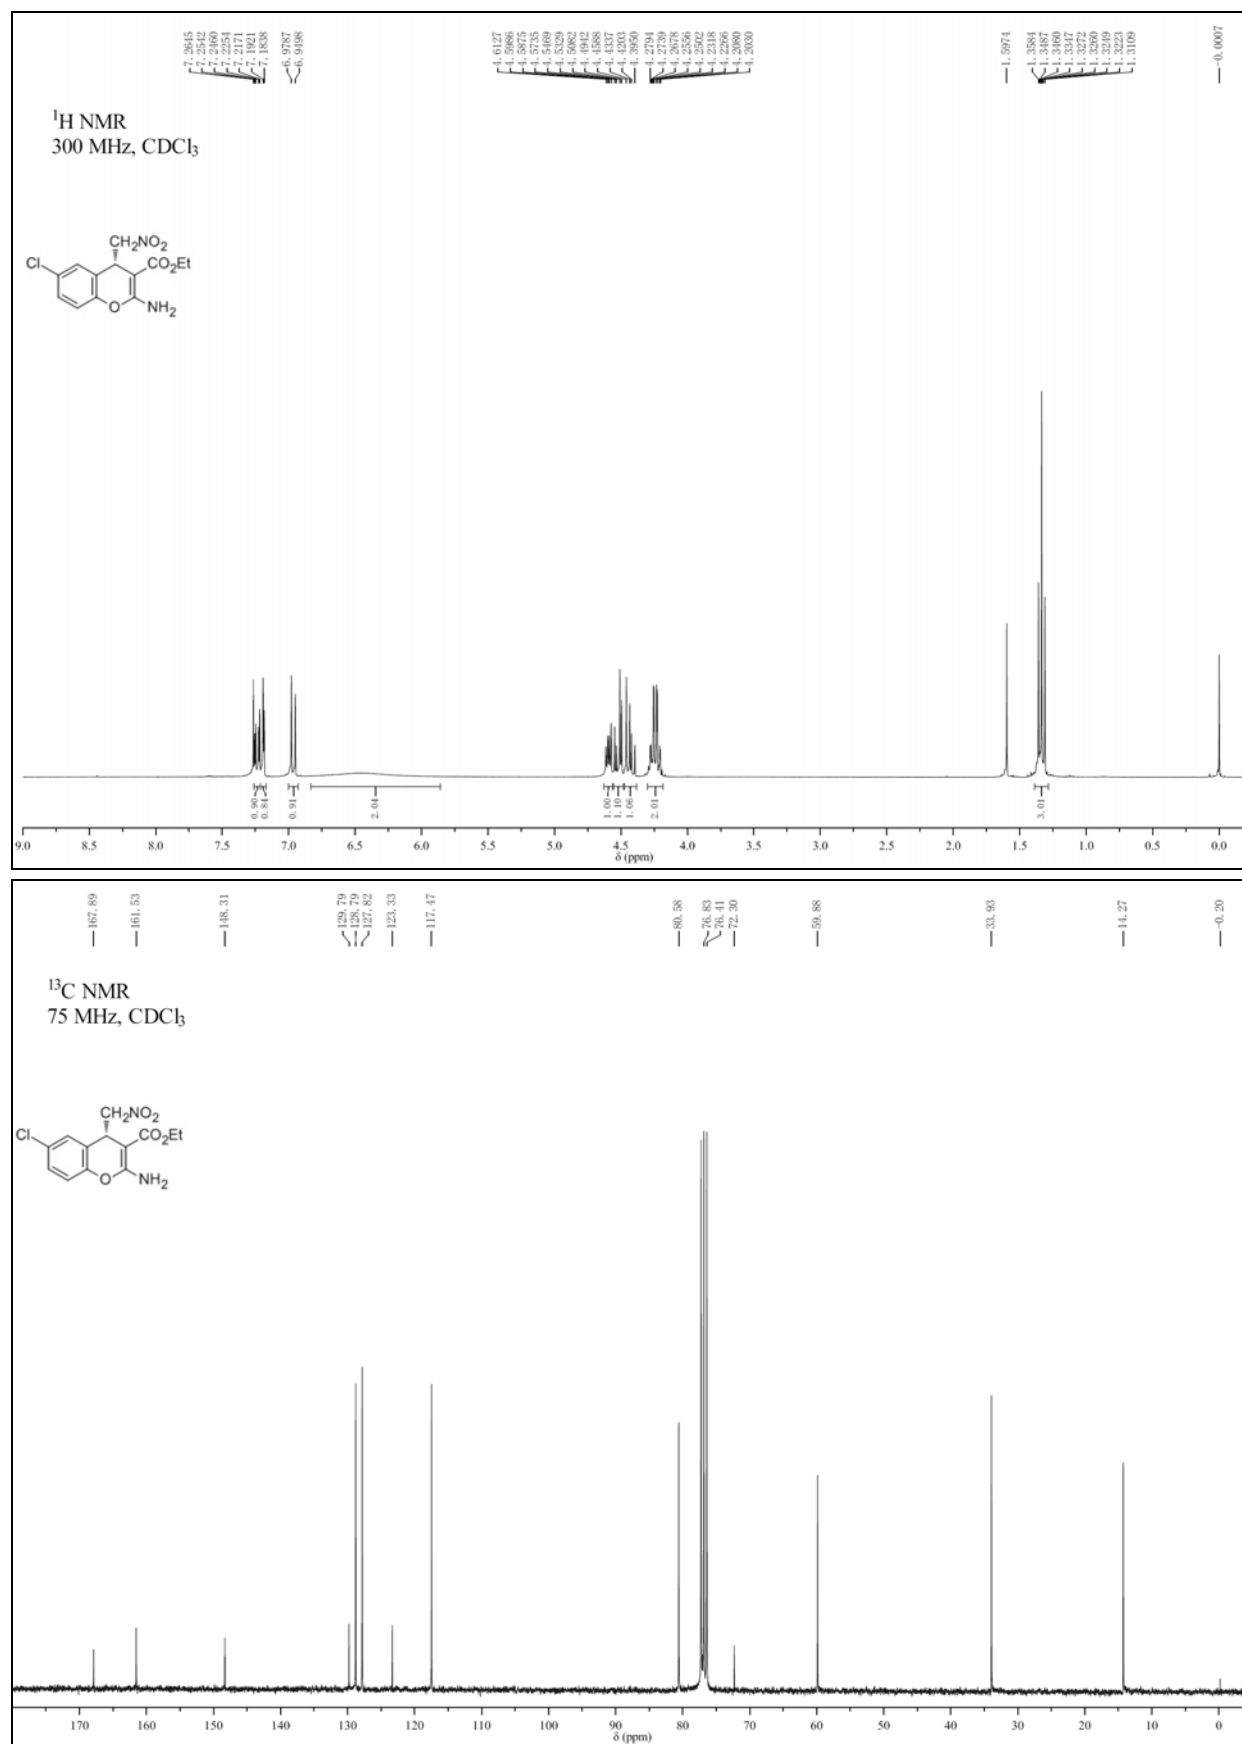



Compound **5d**

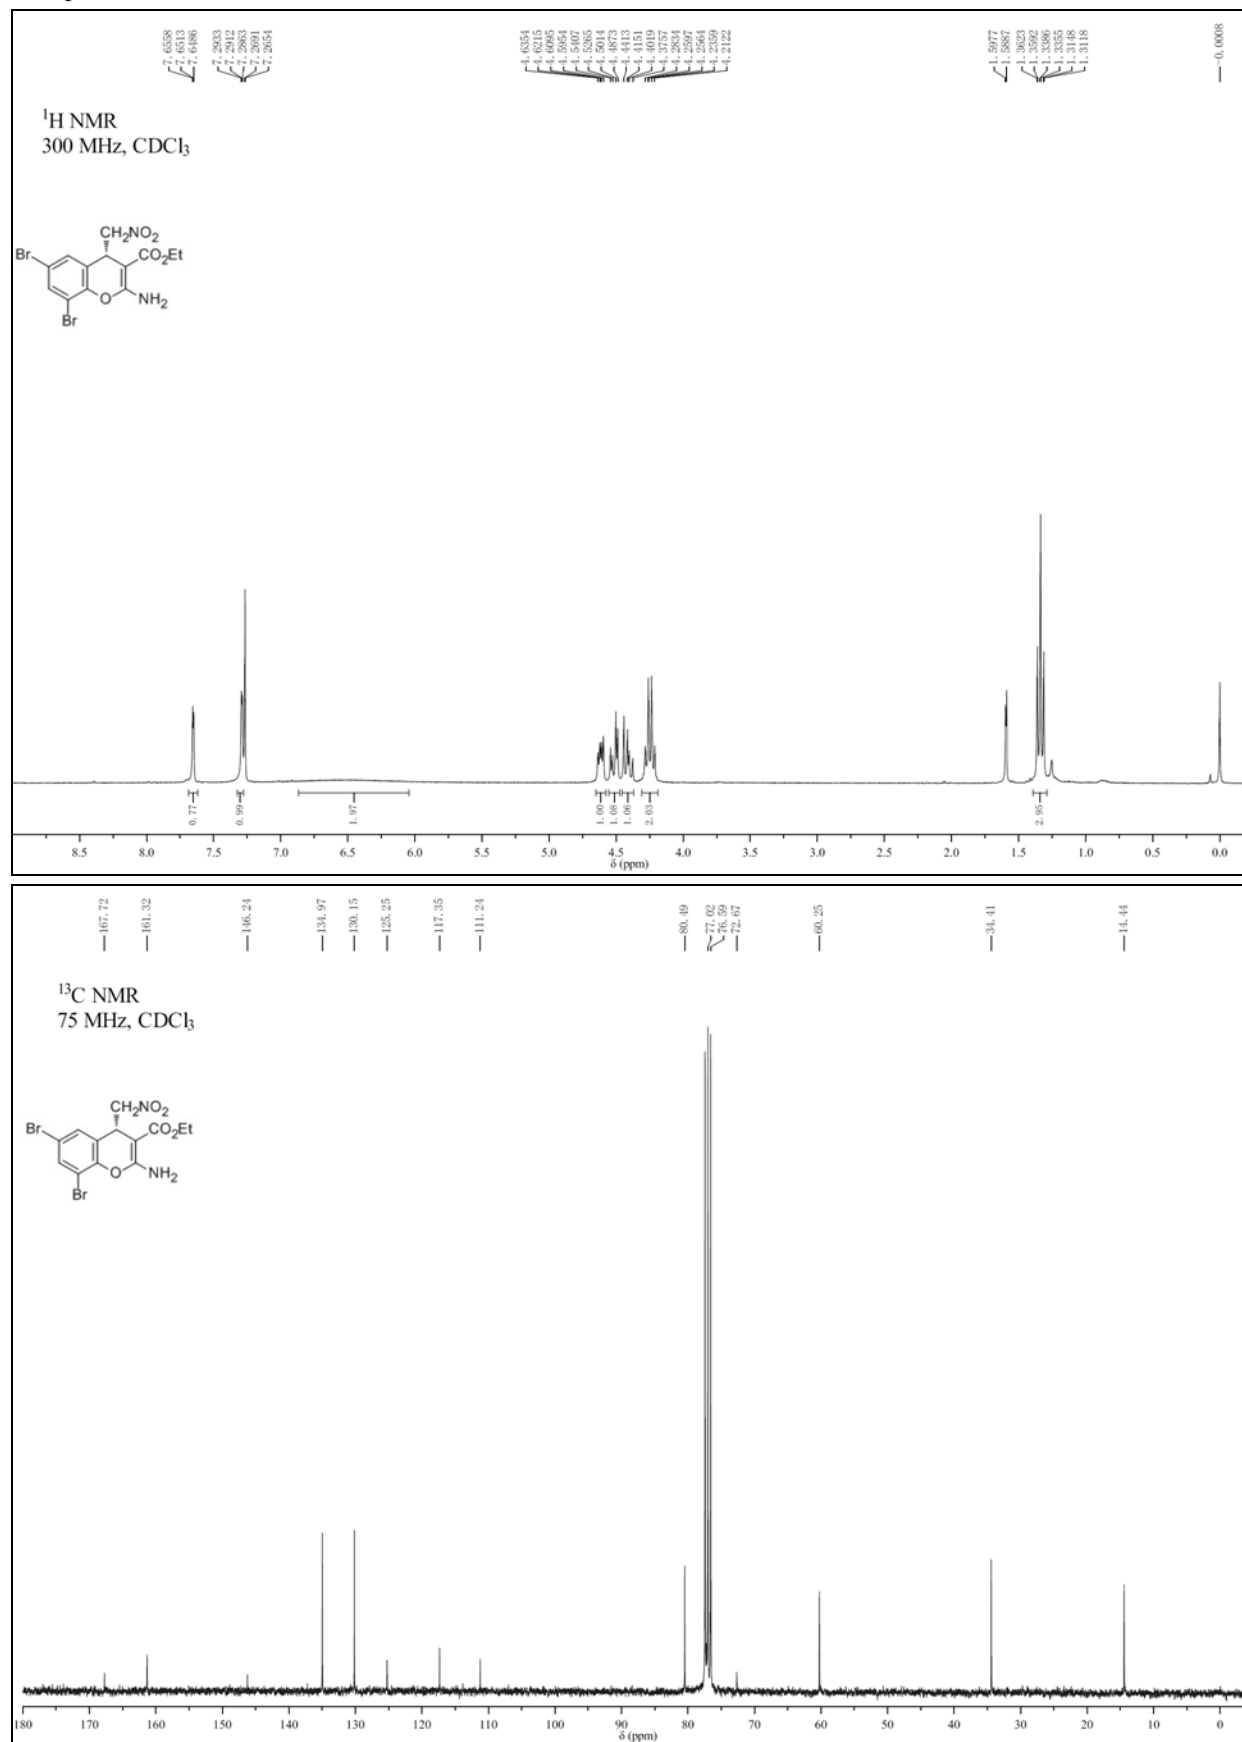

Compound **5e**

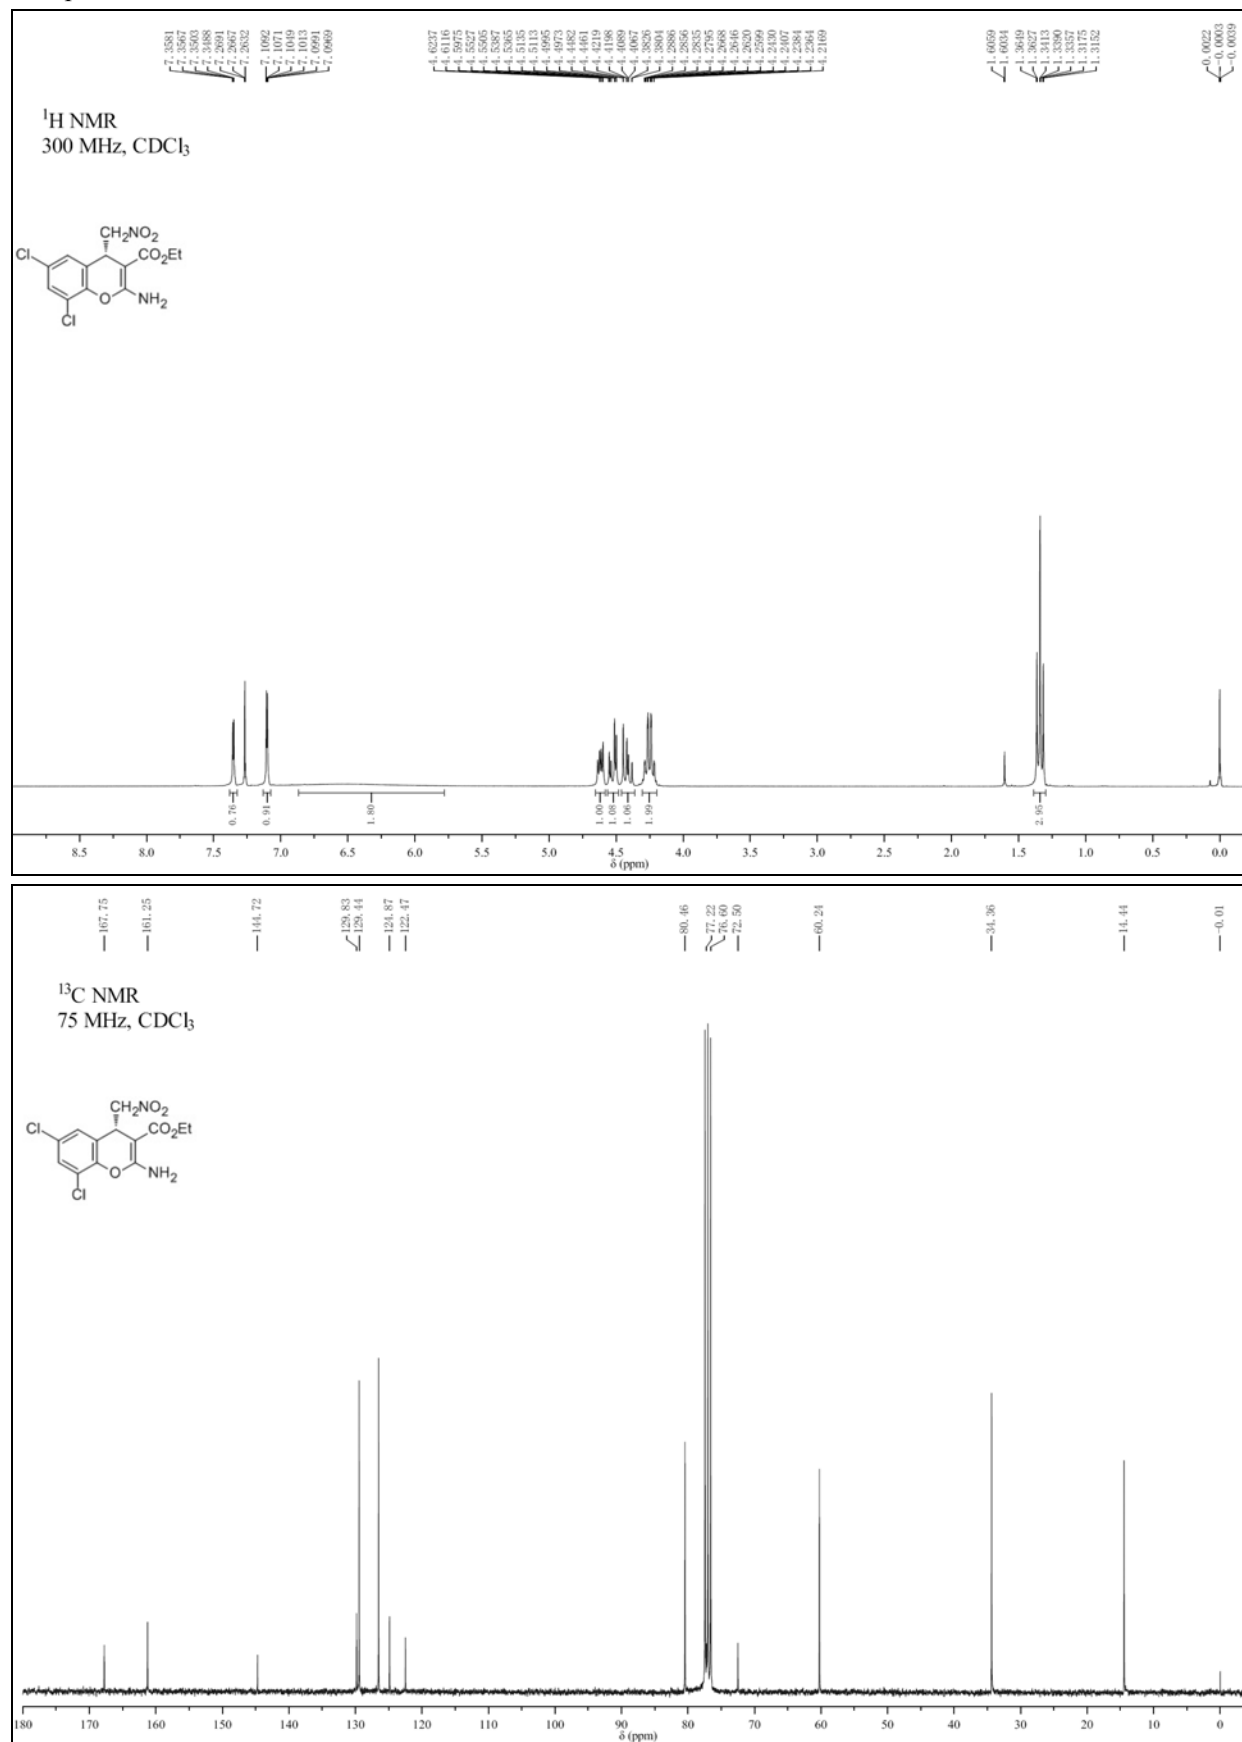

Compound **5f**

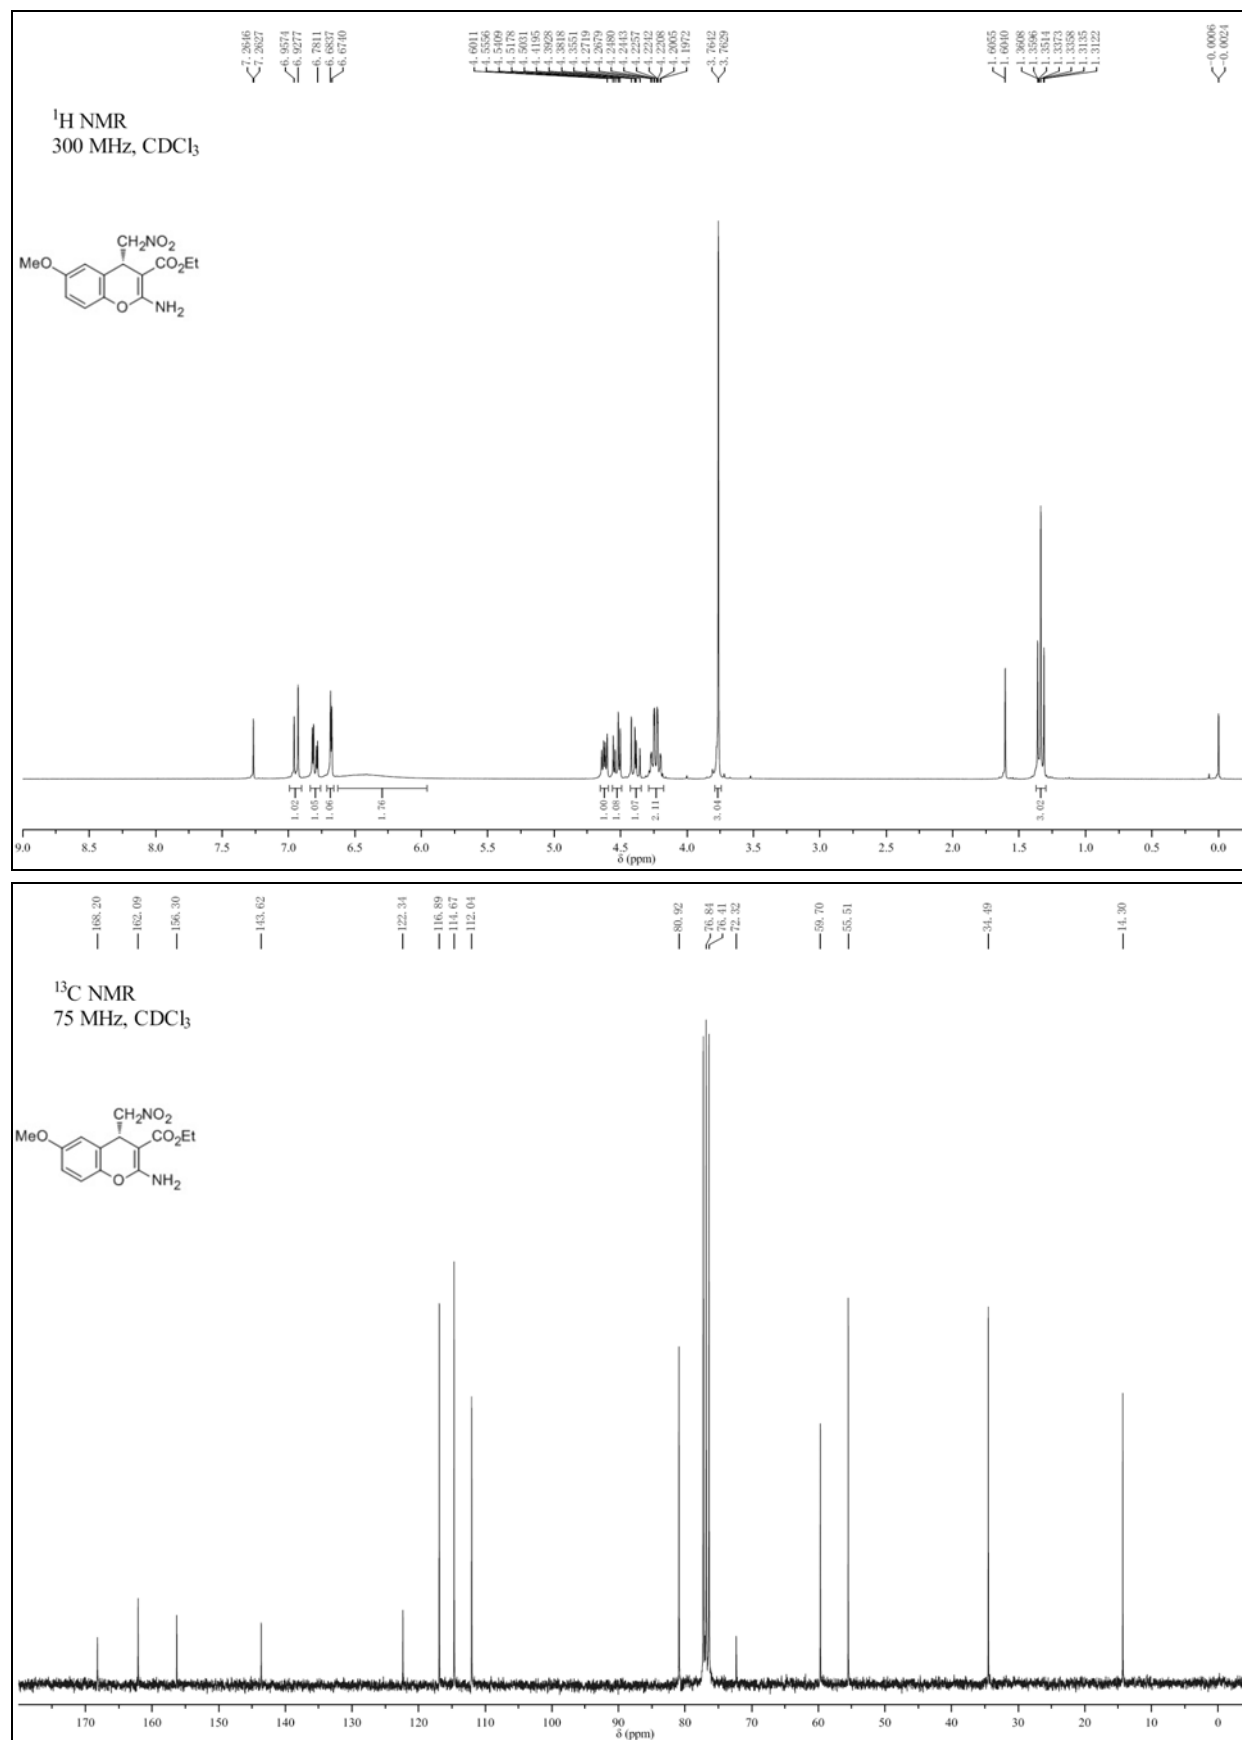

Compound **5g**

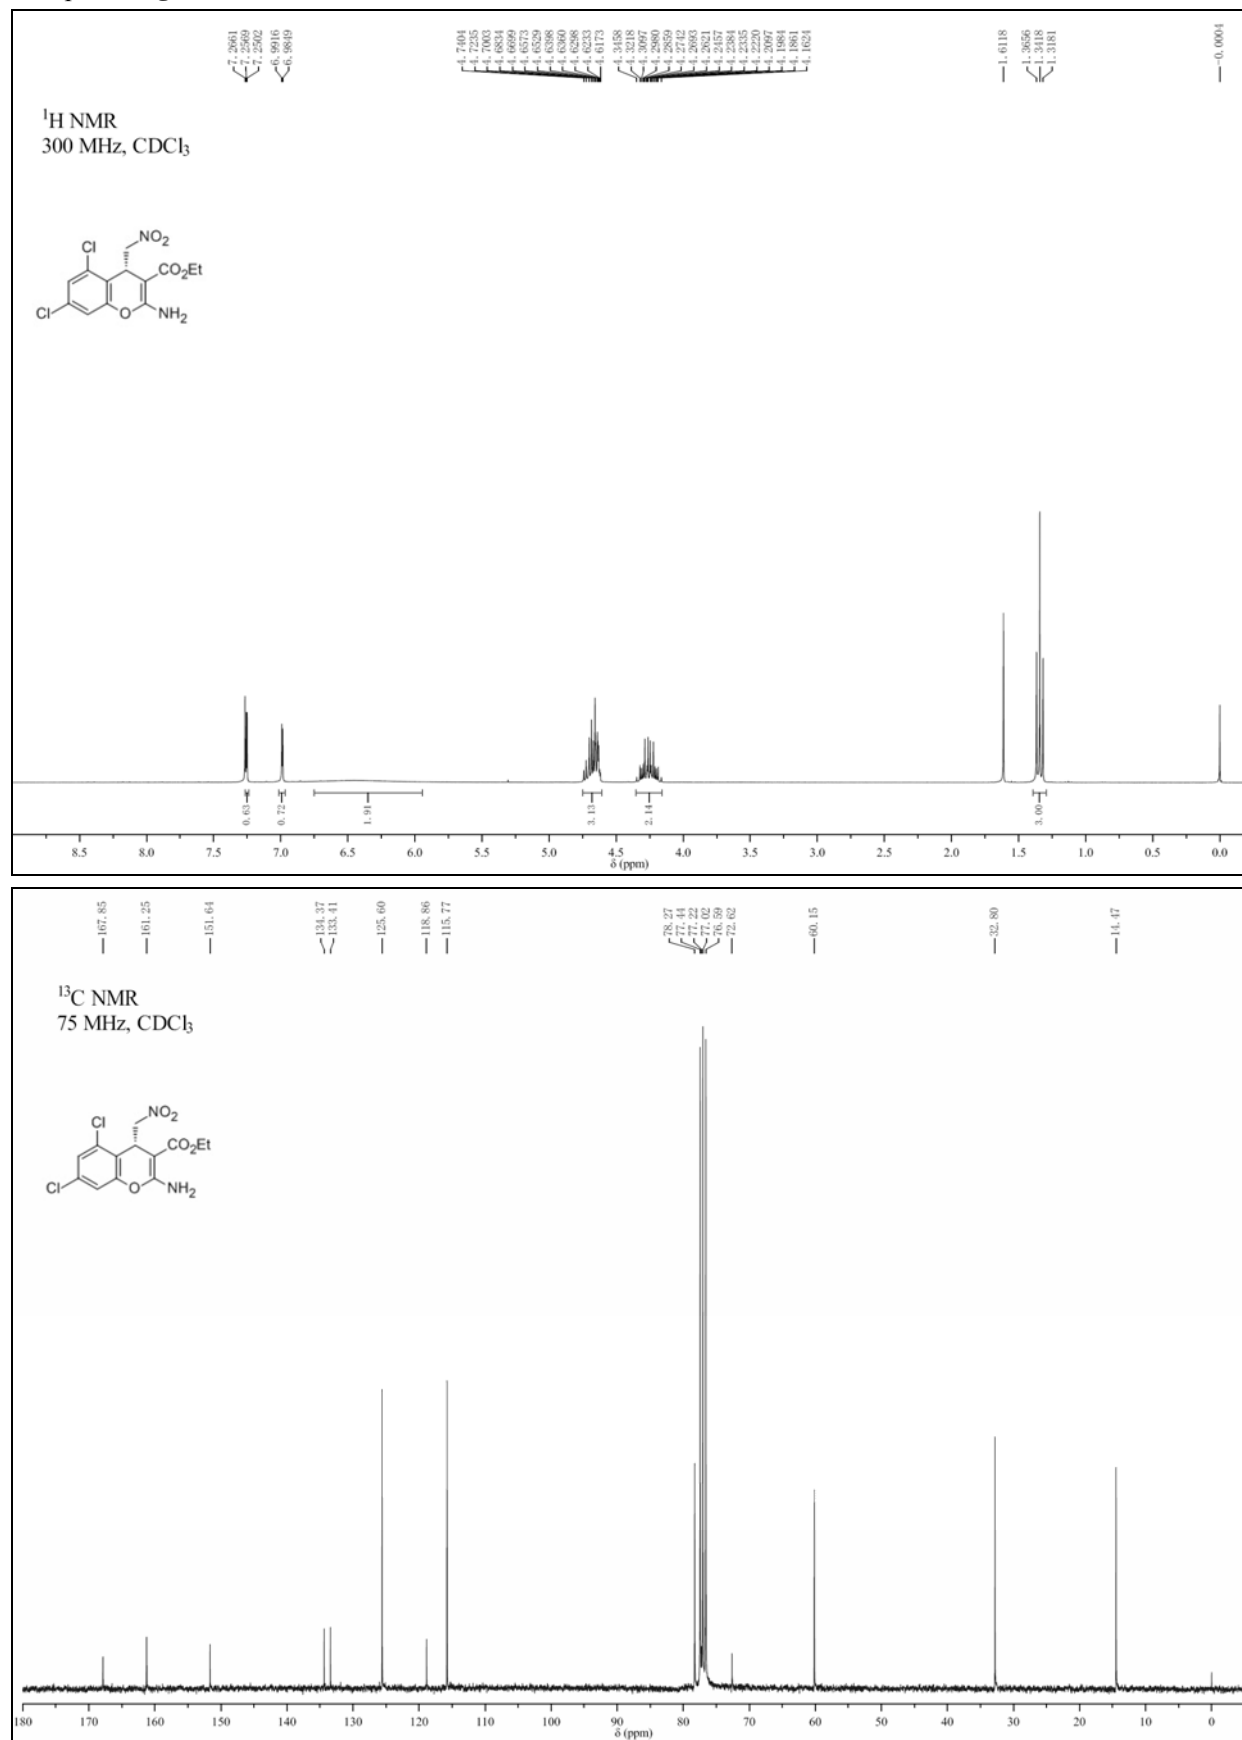

Compound **5h**

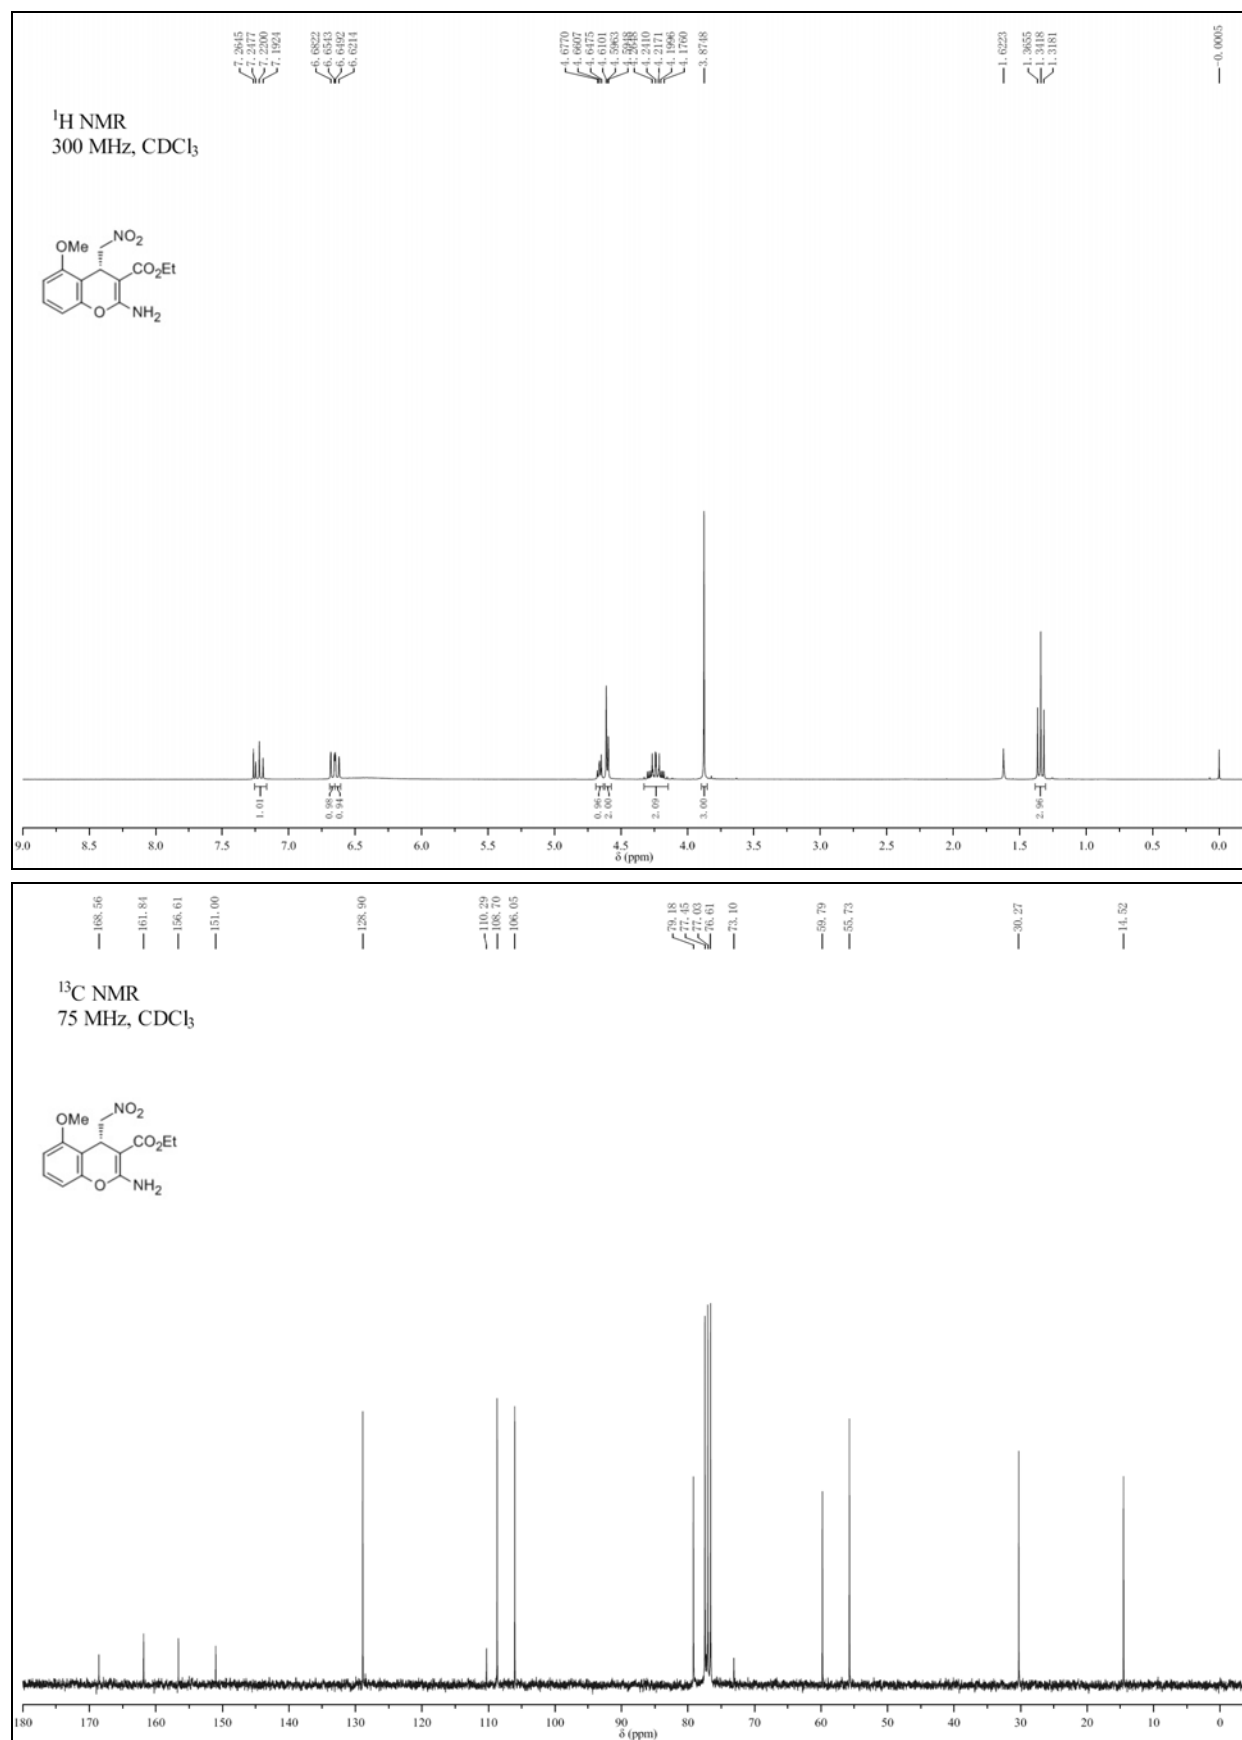

Compound **6a**

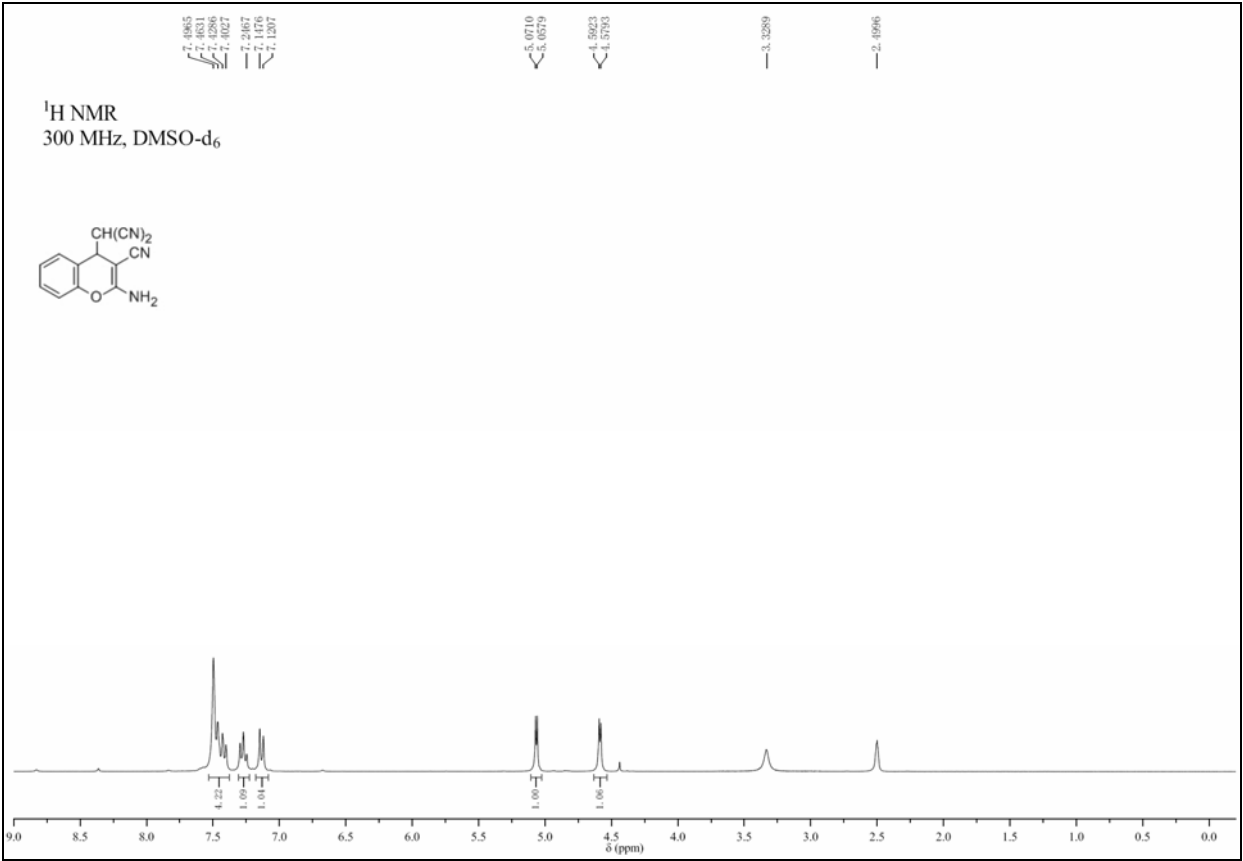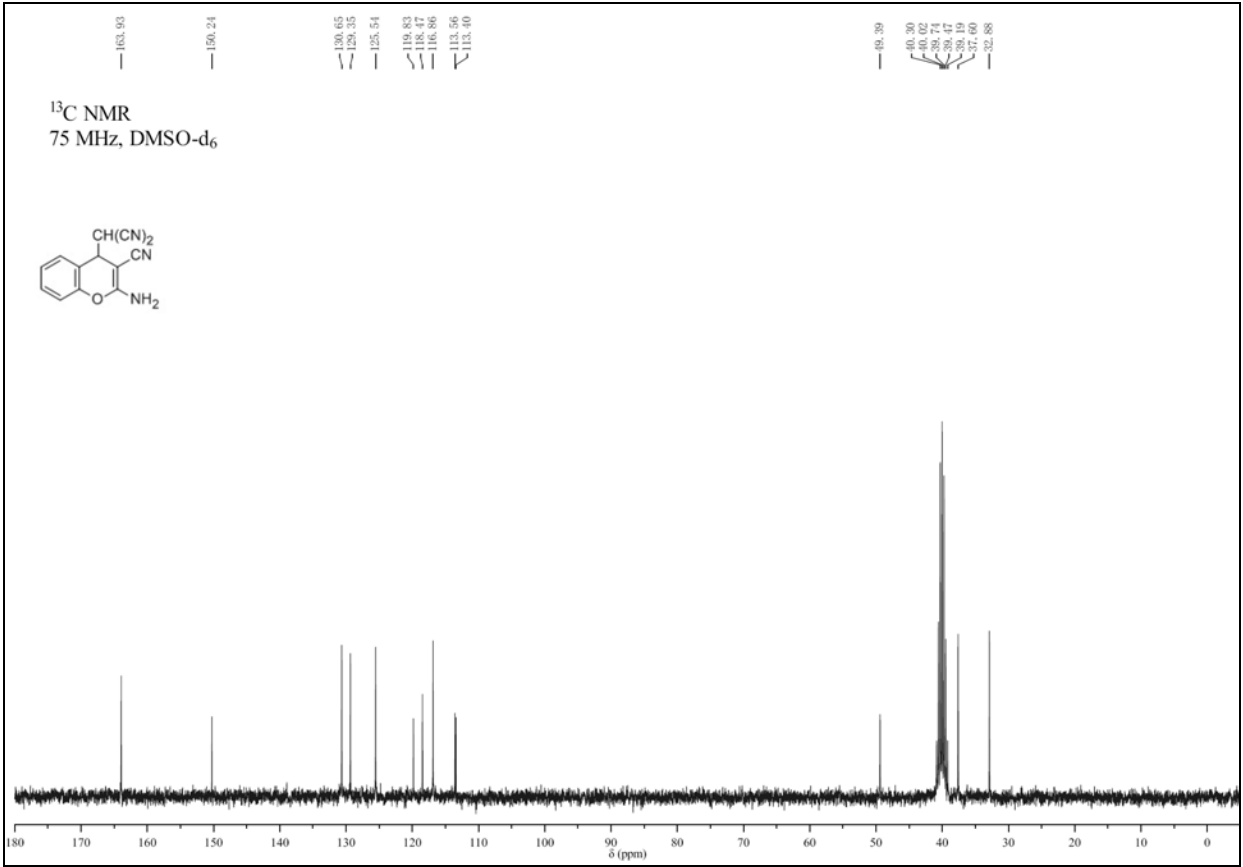

Compound **6b**

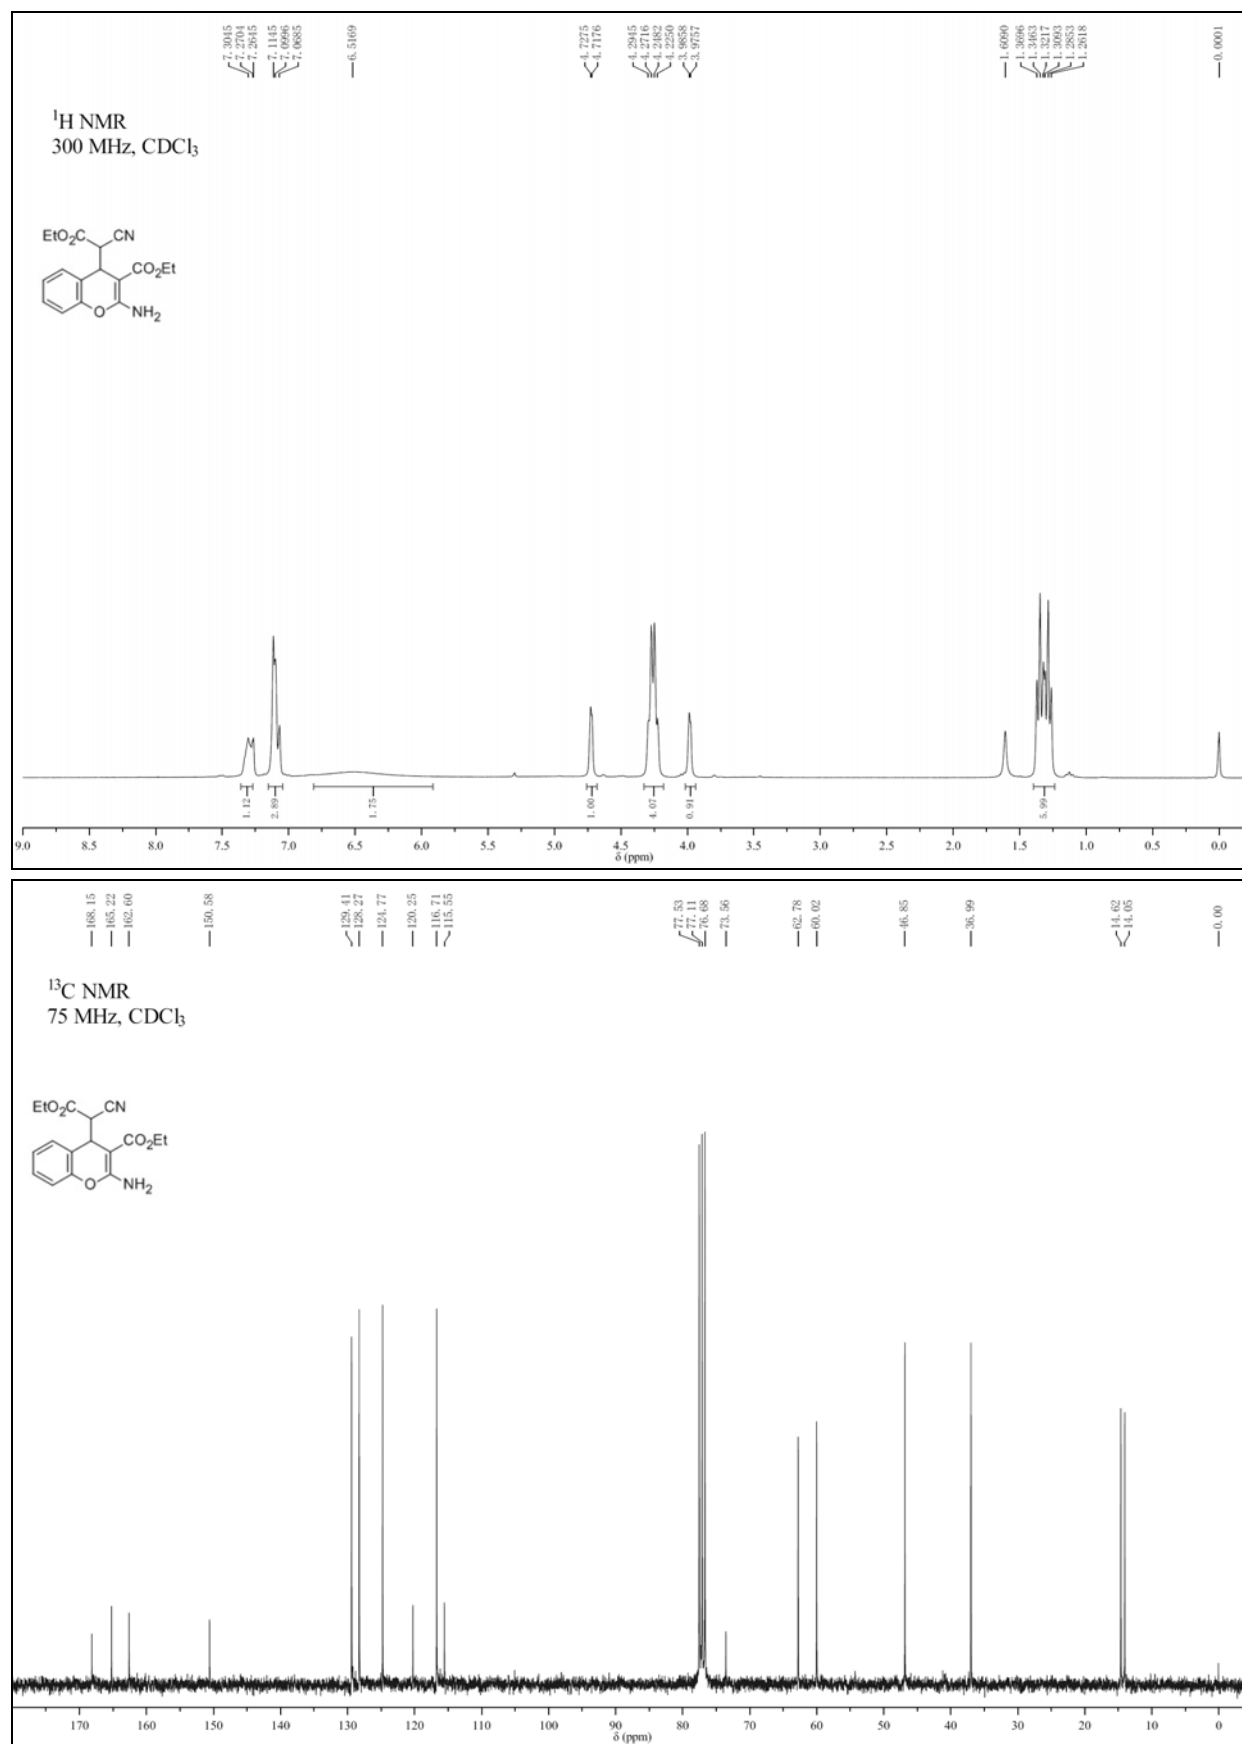

Compound **Ia**

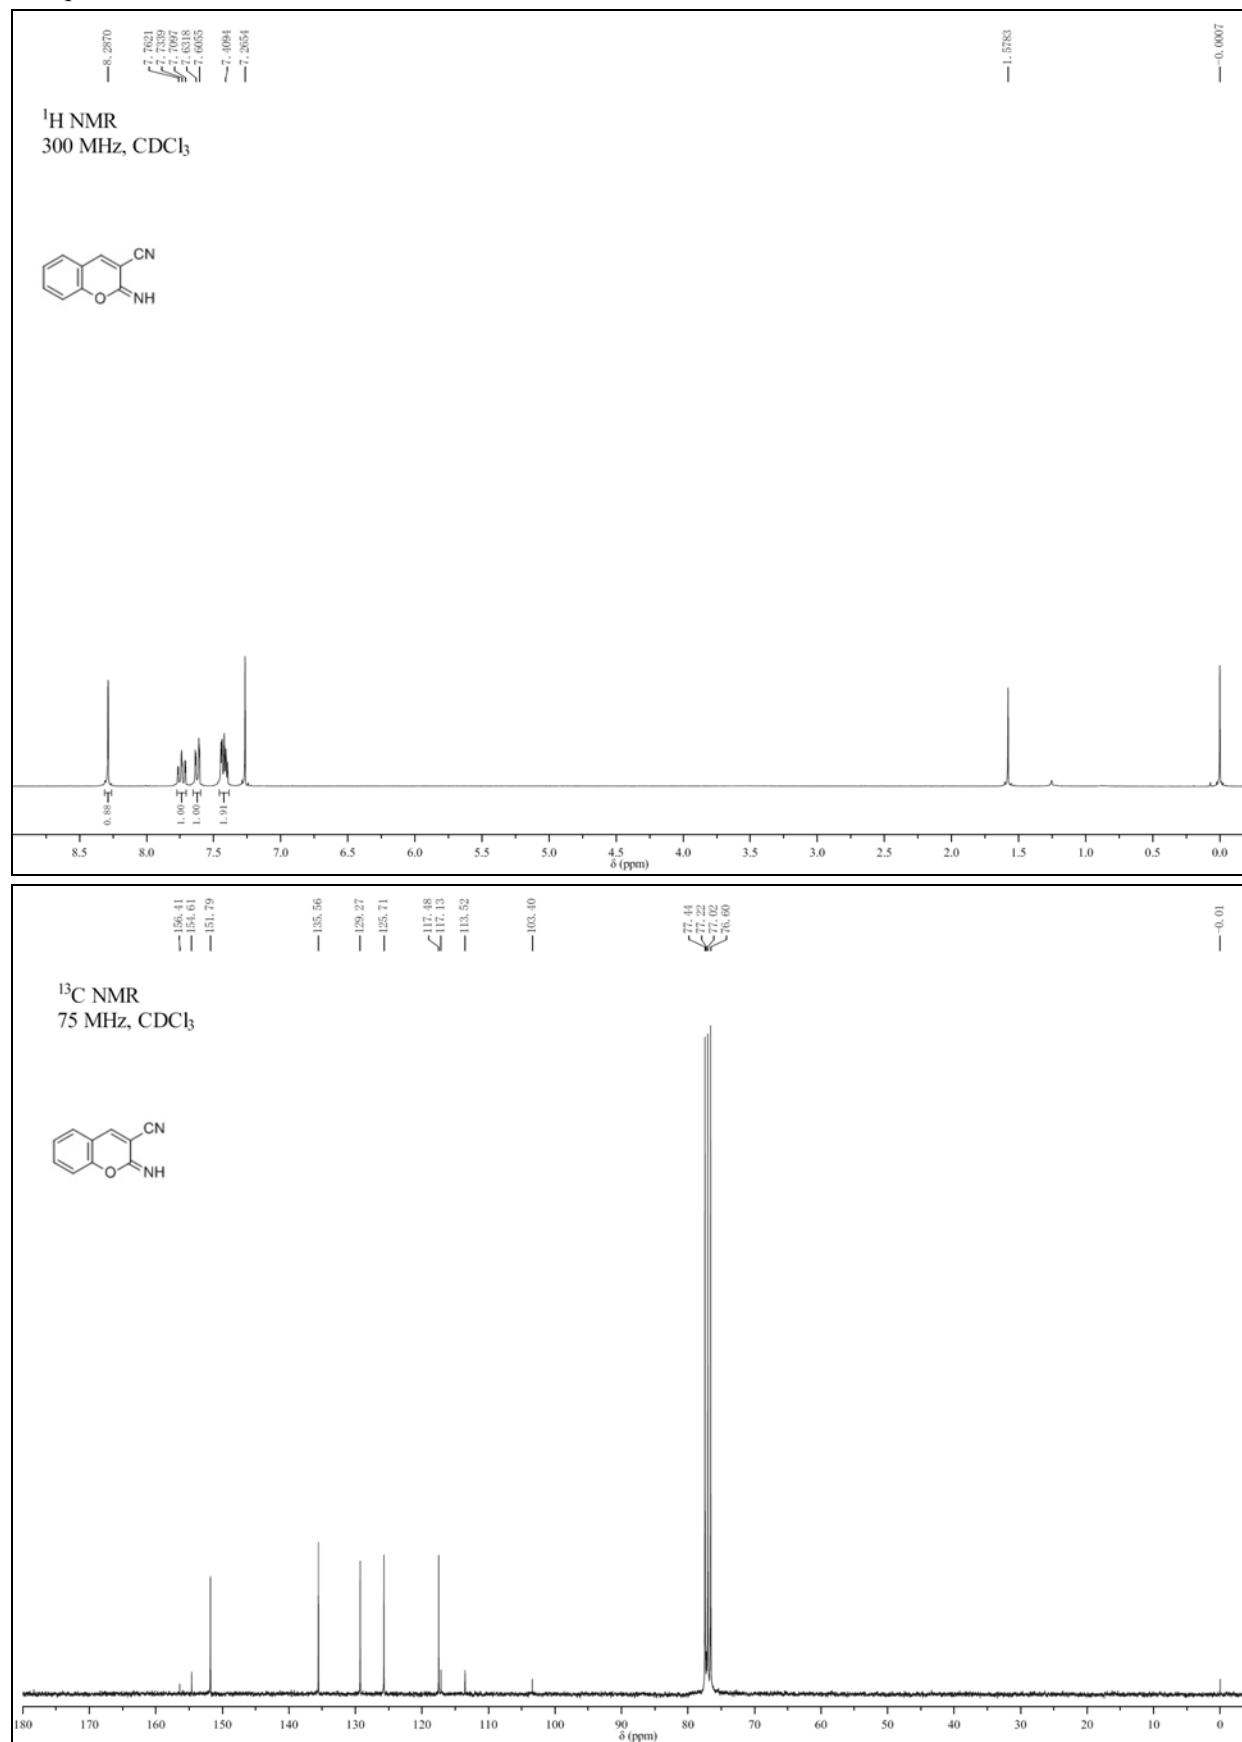



Compound **Ib**

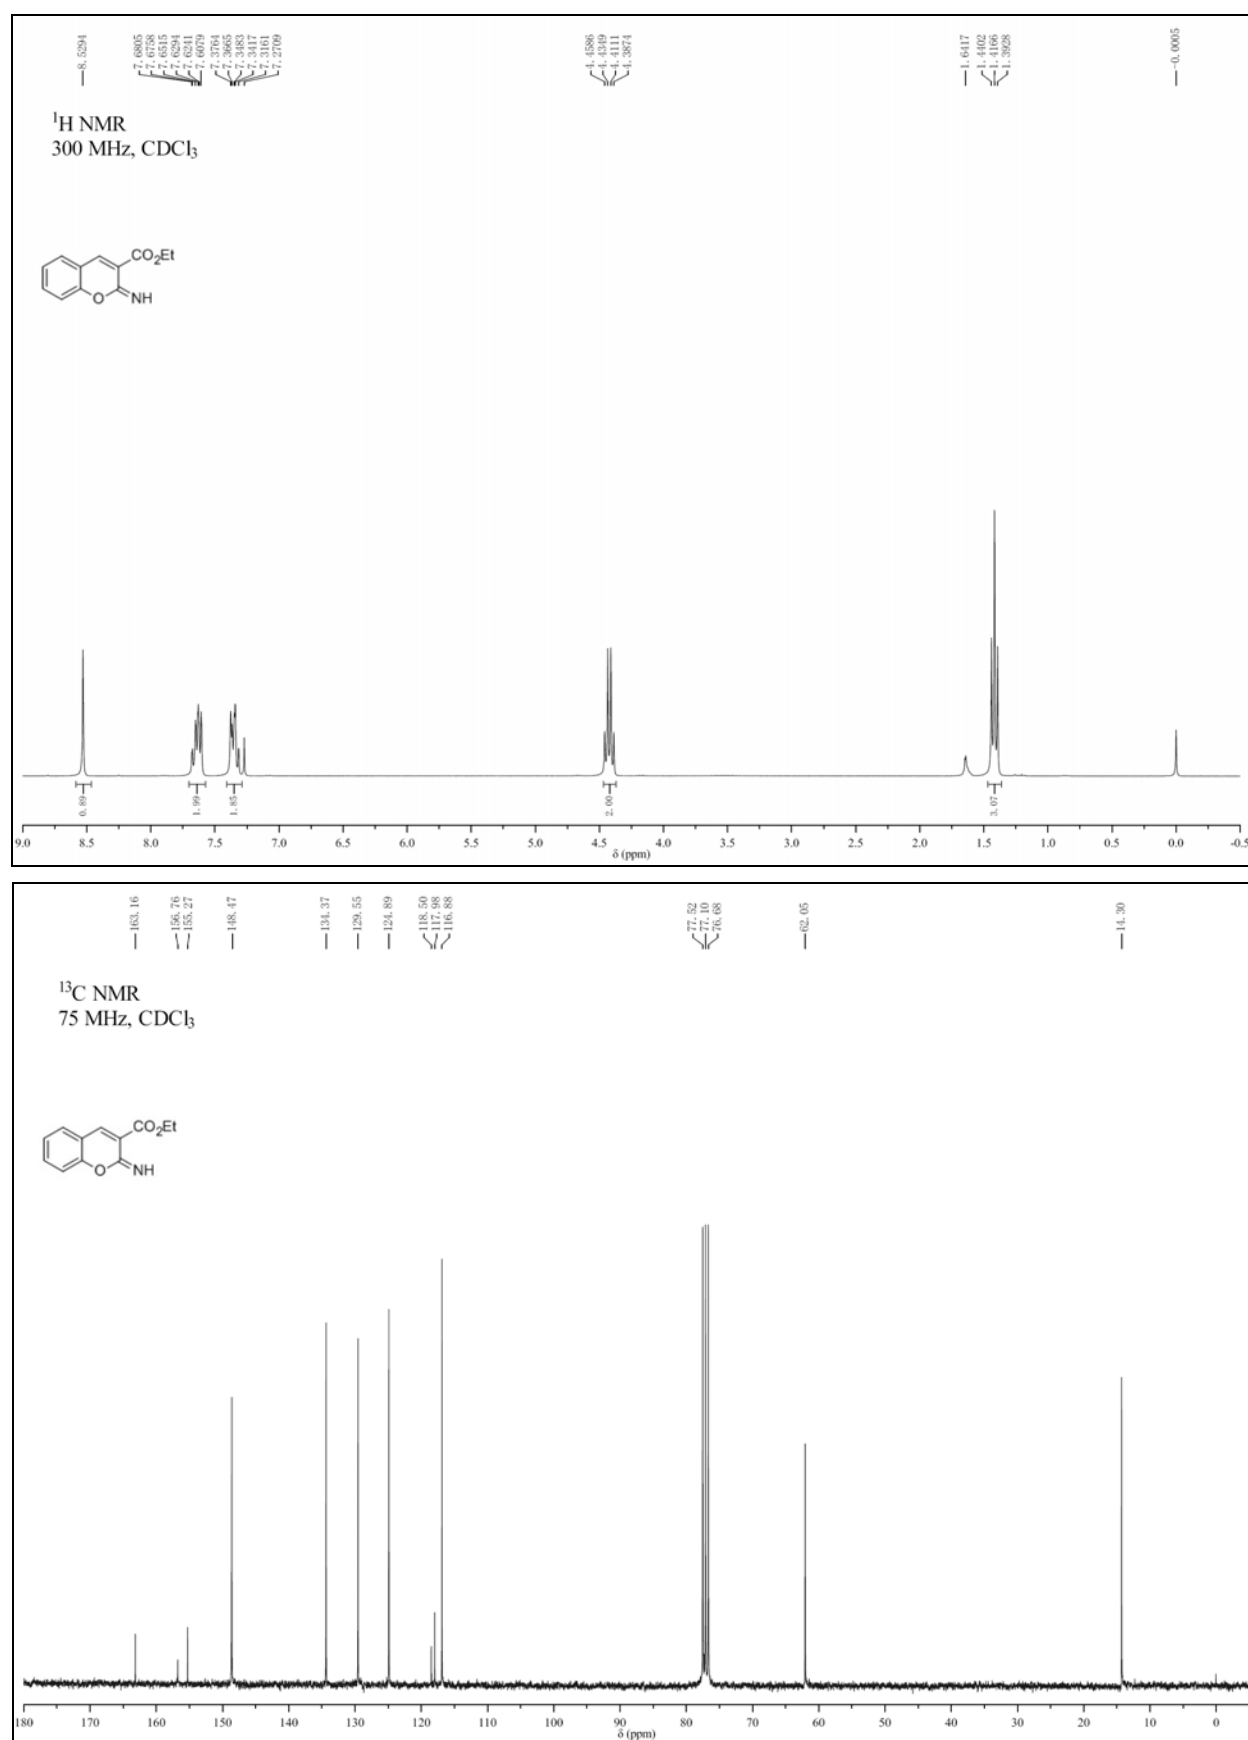

## HPLC Profile

### Racemic **4a**

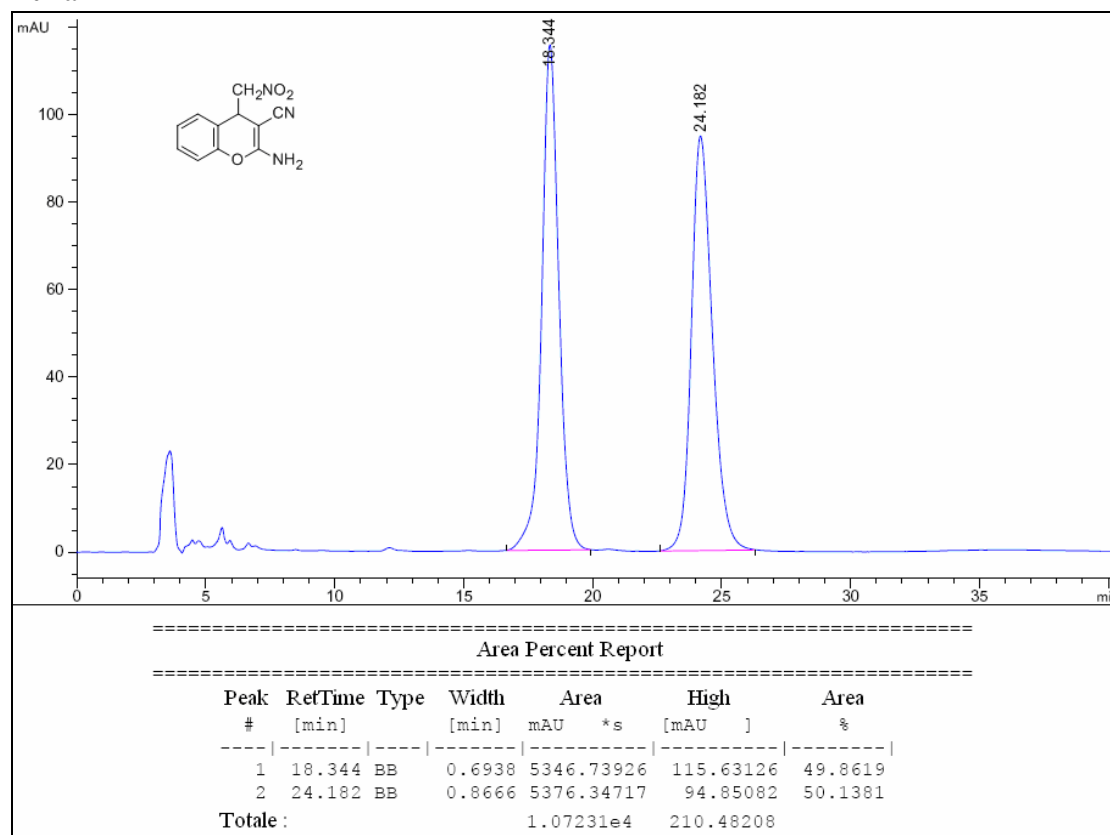

### Enantiomeric enriched **4a**

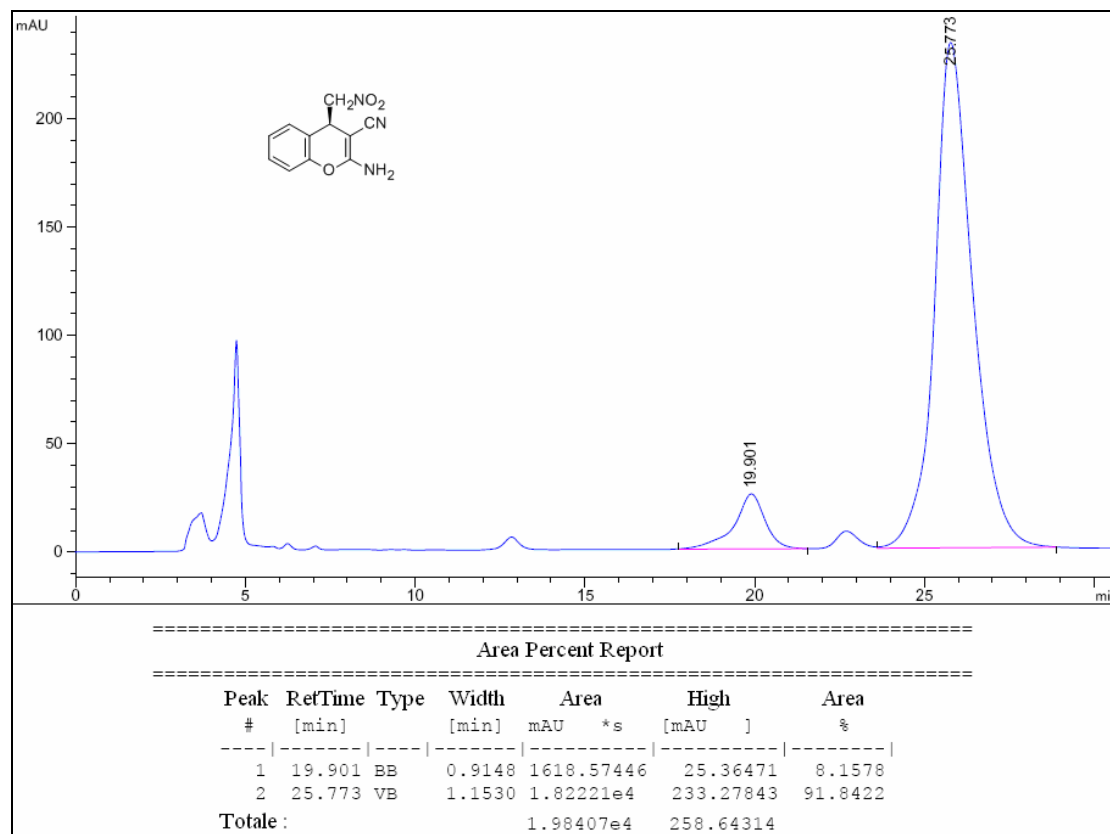

# Racemic **4b**

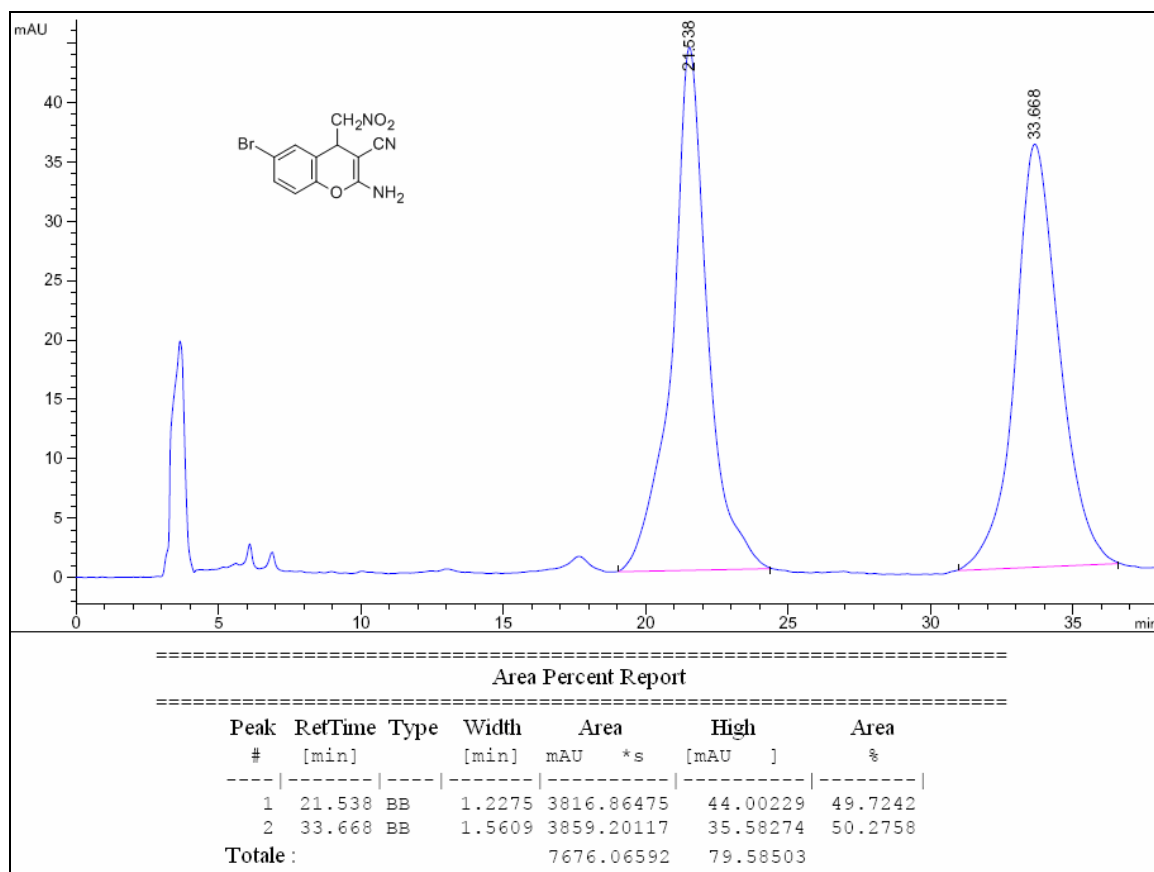

# Enantiomeric enriched **4b**

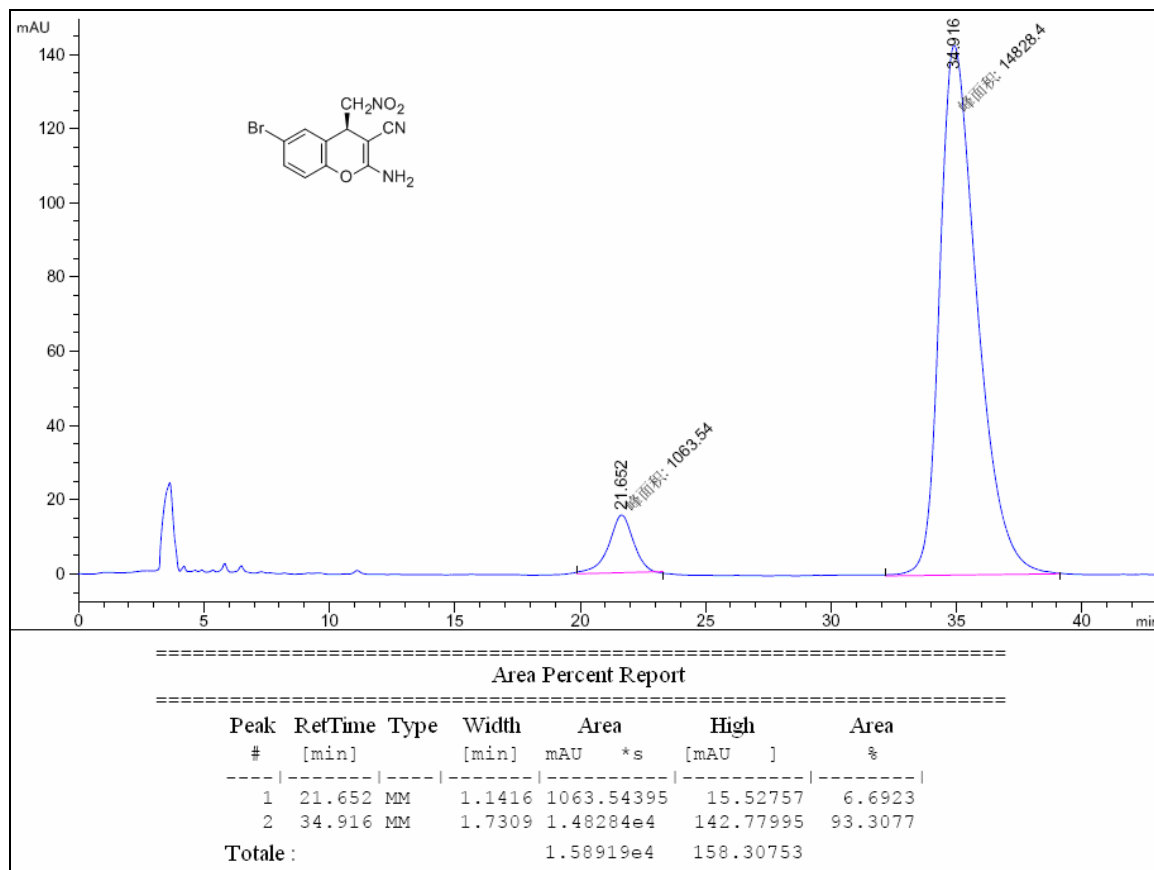

### Racemic **4c**

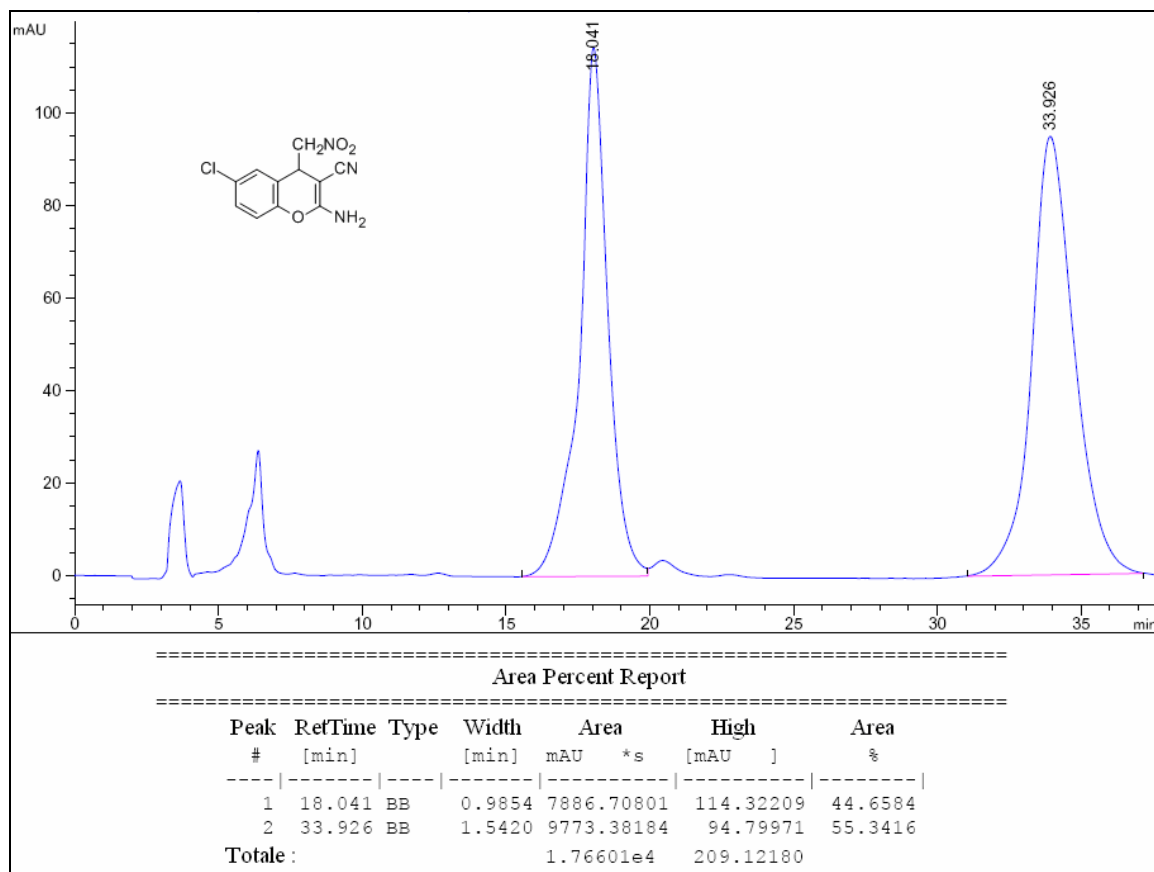

### Enantiomeric enriched **4c**

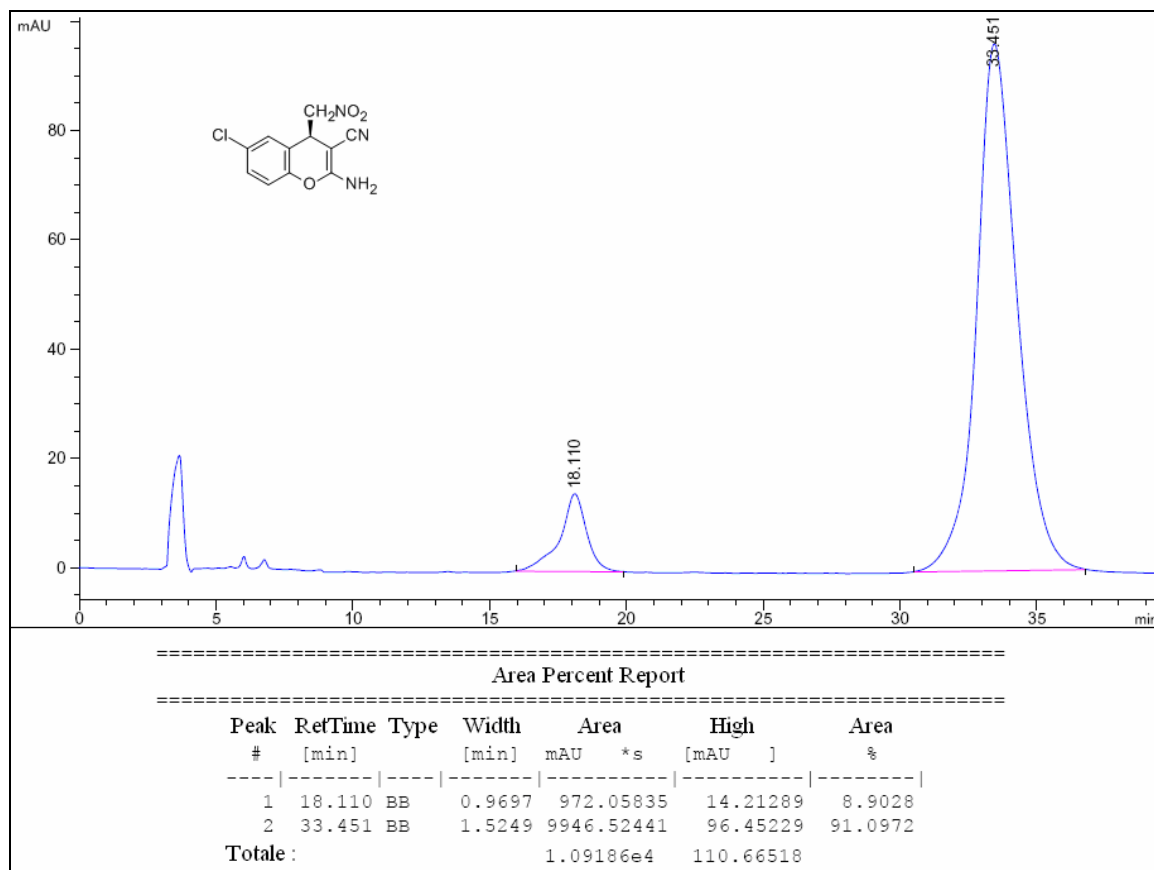

### Racemic **4d**

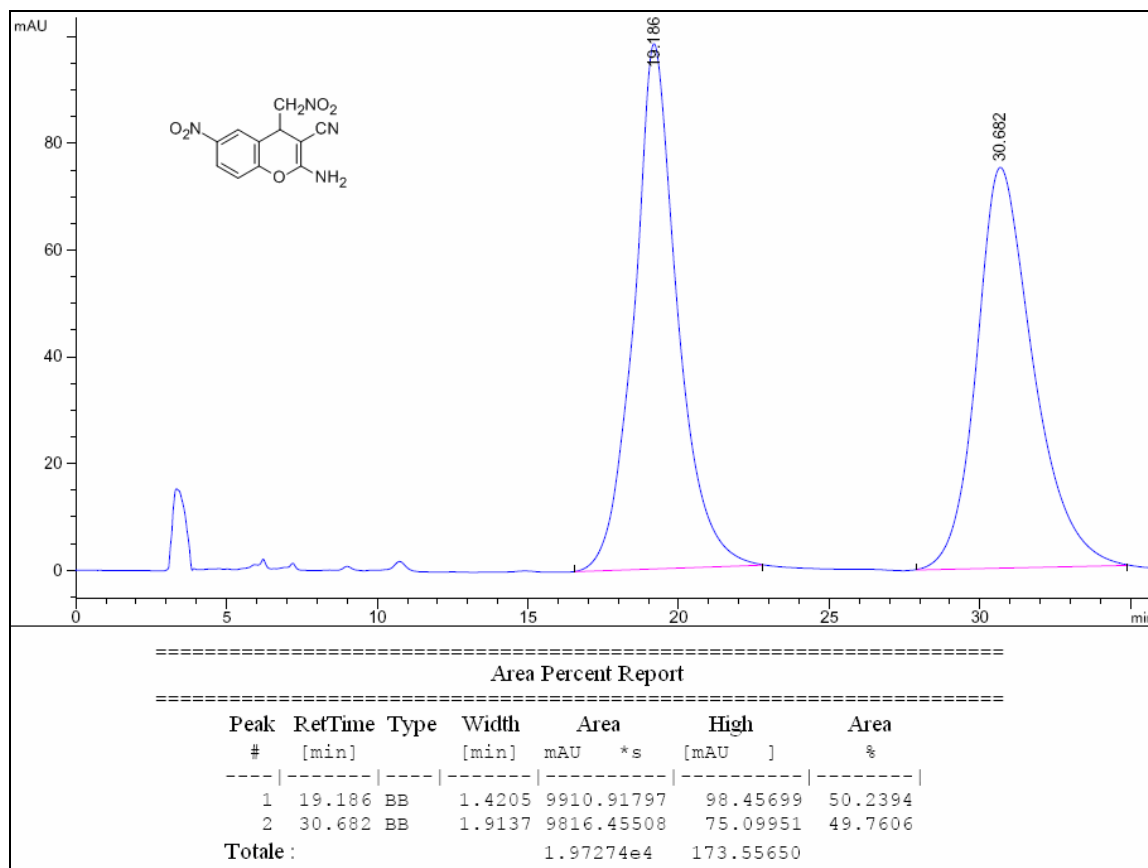

### Enantiomeric enriched **4d**

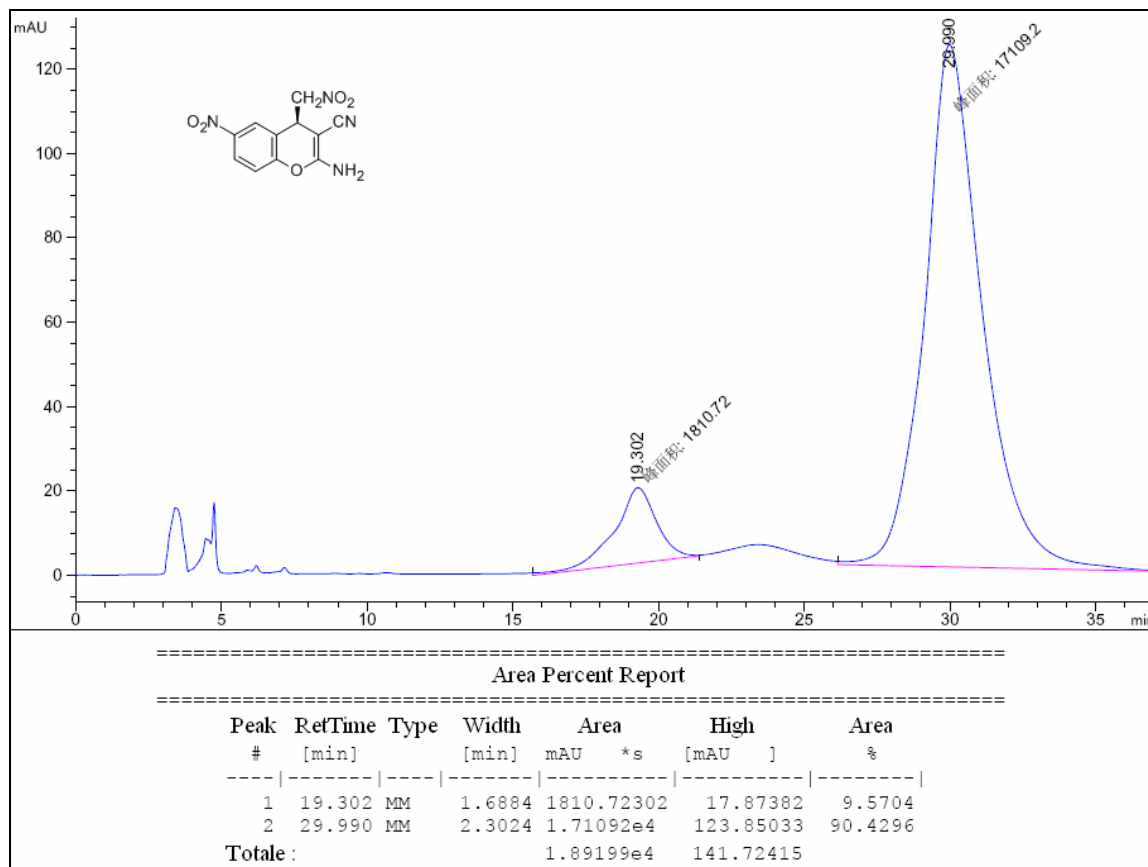

### Racemic **4e**

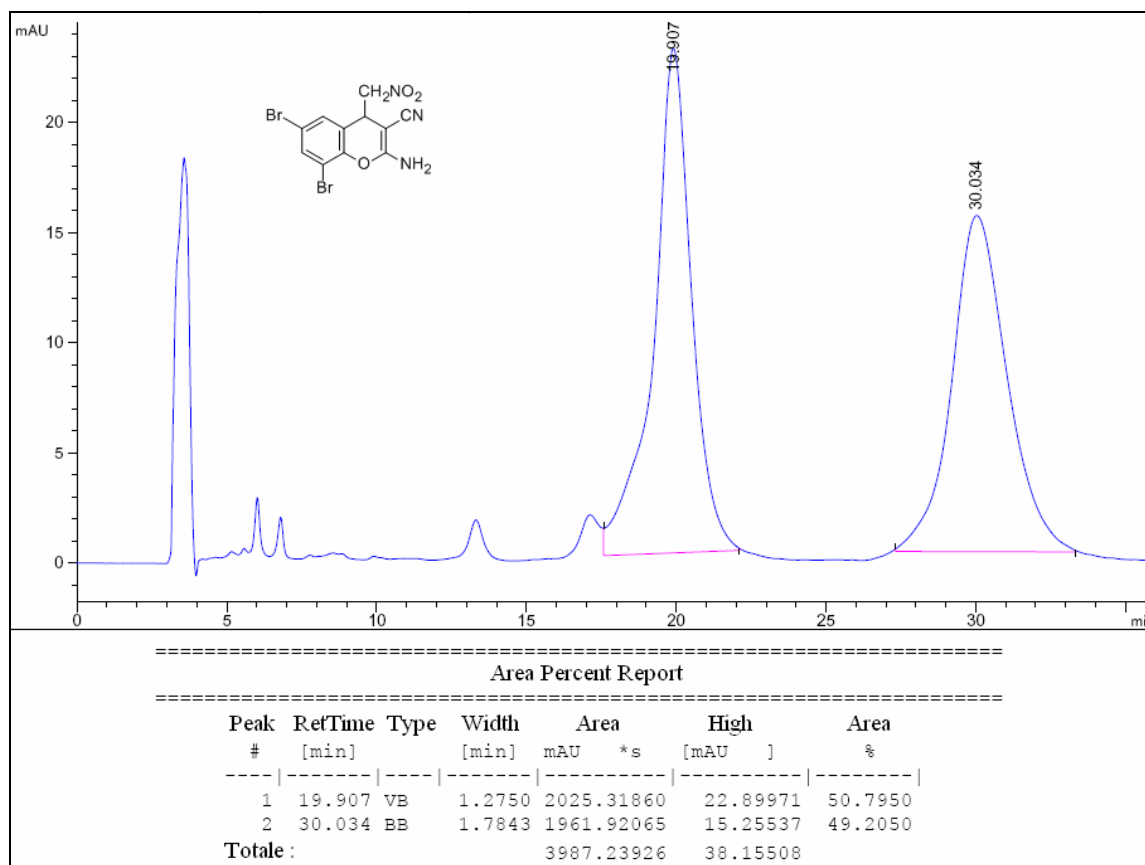

### Enantiomeric enriched **4e**

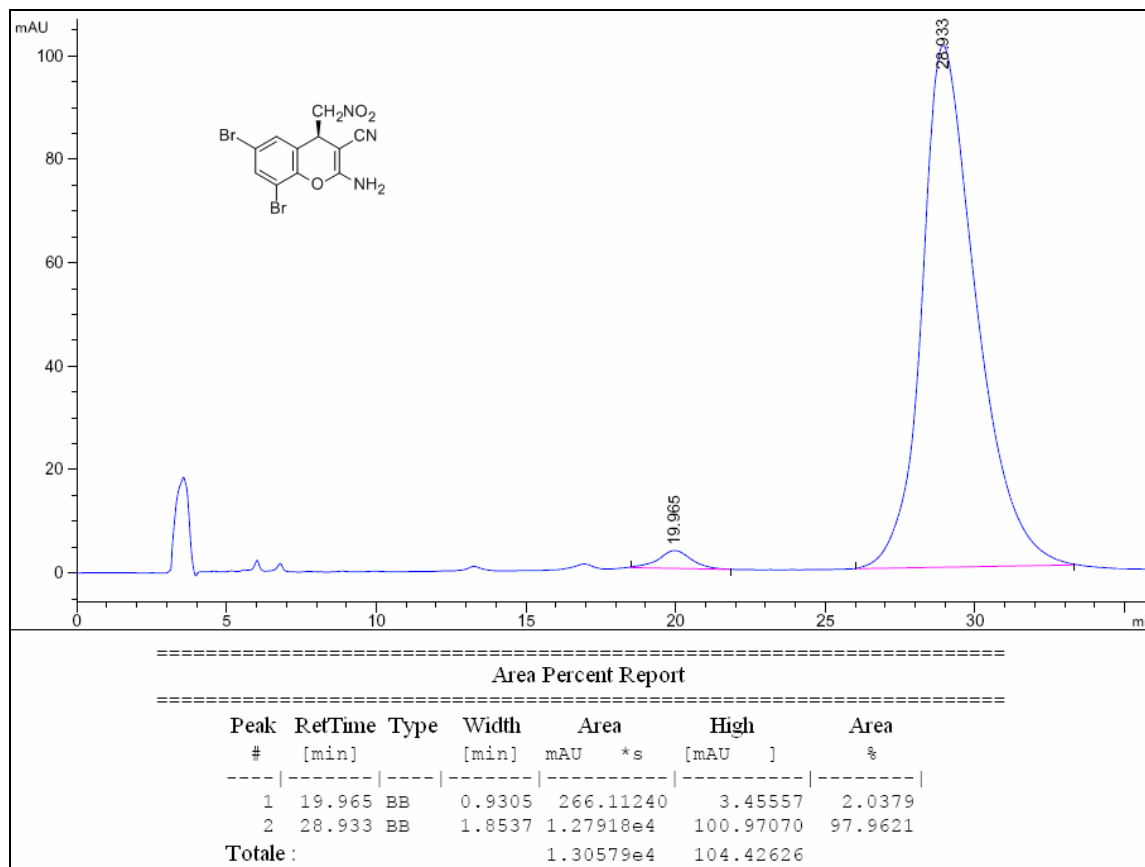

### Racemic **4f**

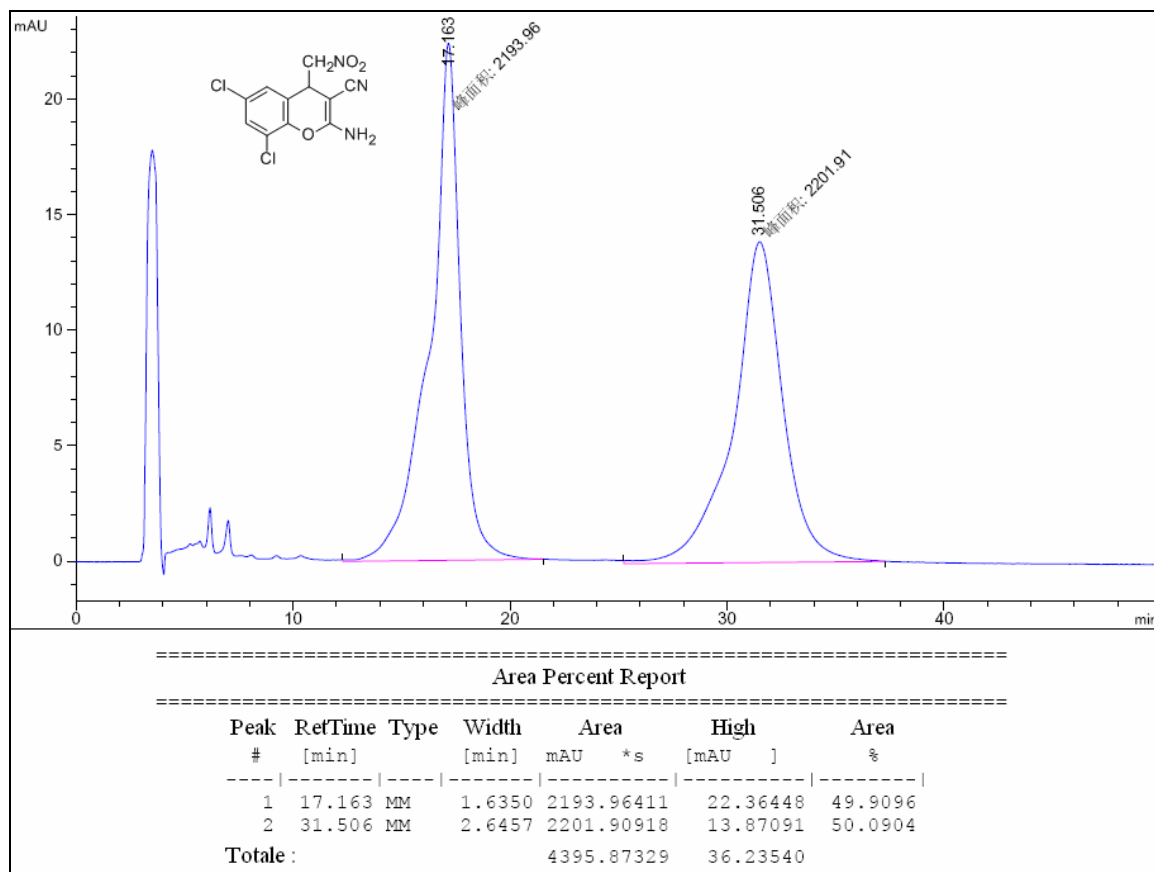

### Enantiomeric enriched **4f**

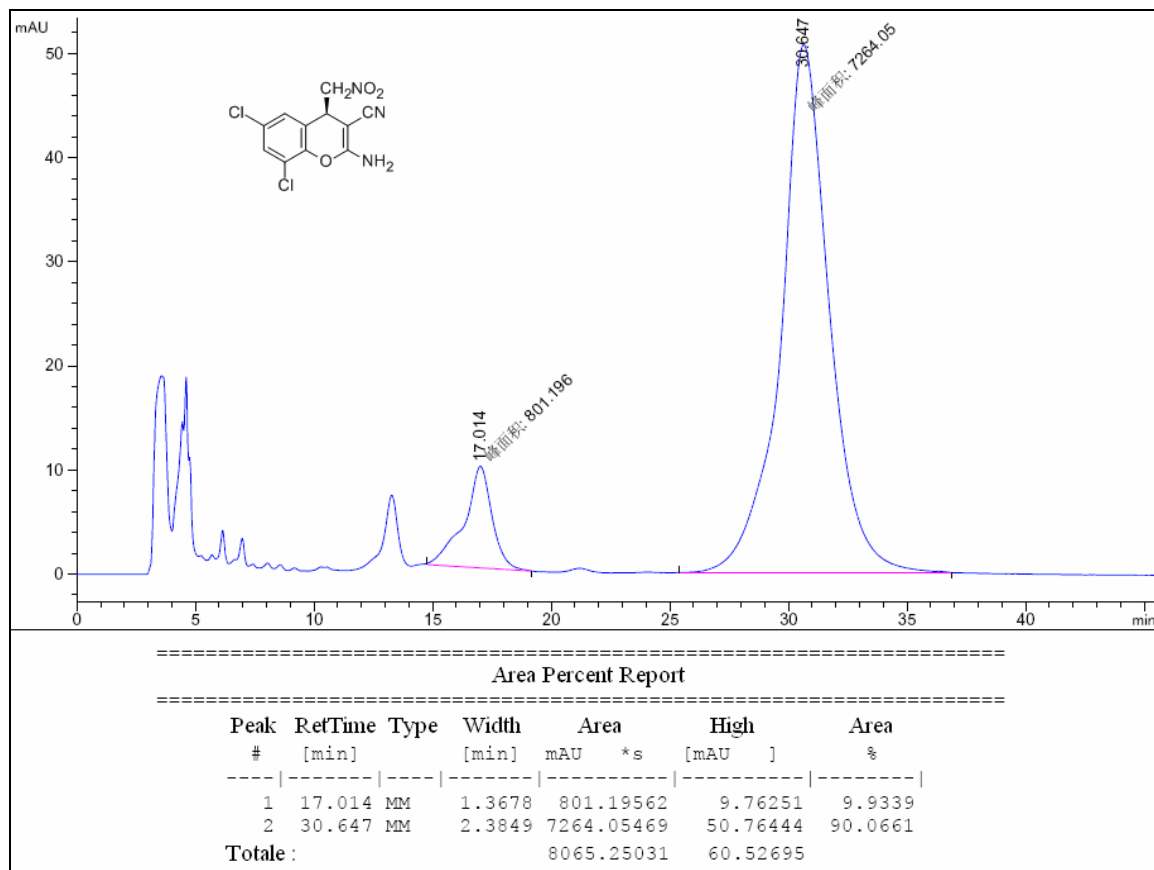

Racemic **4g**

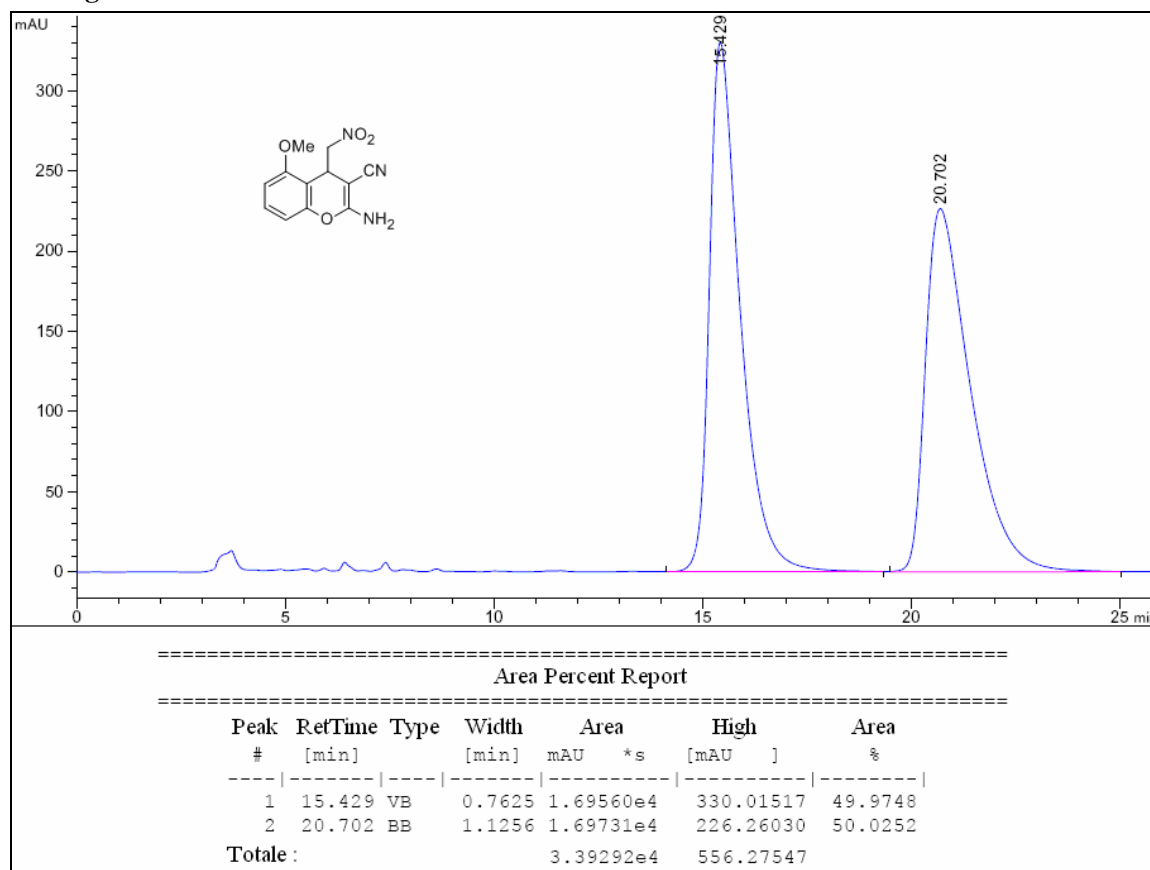

Enantiomeric enriched **4g**

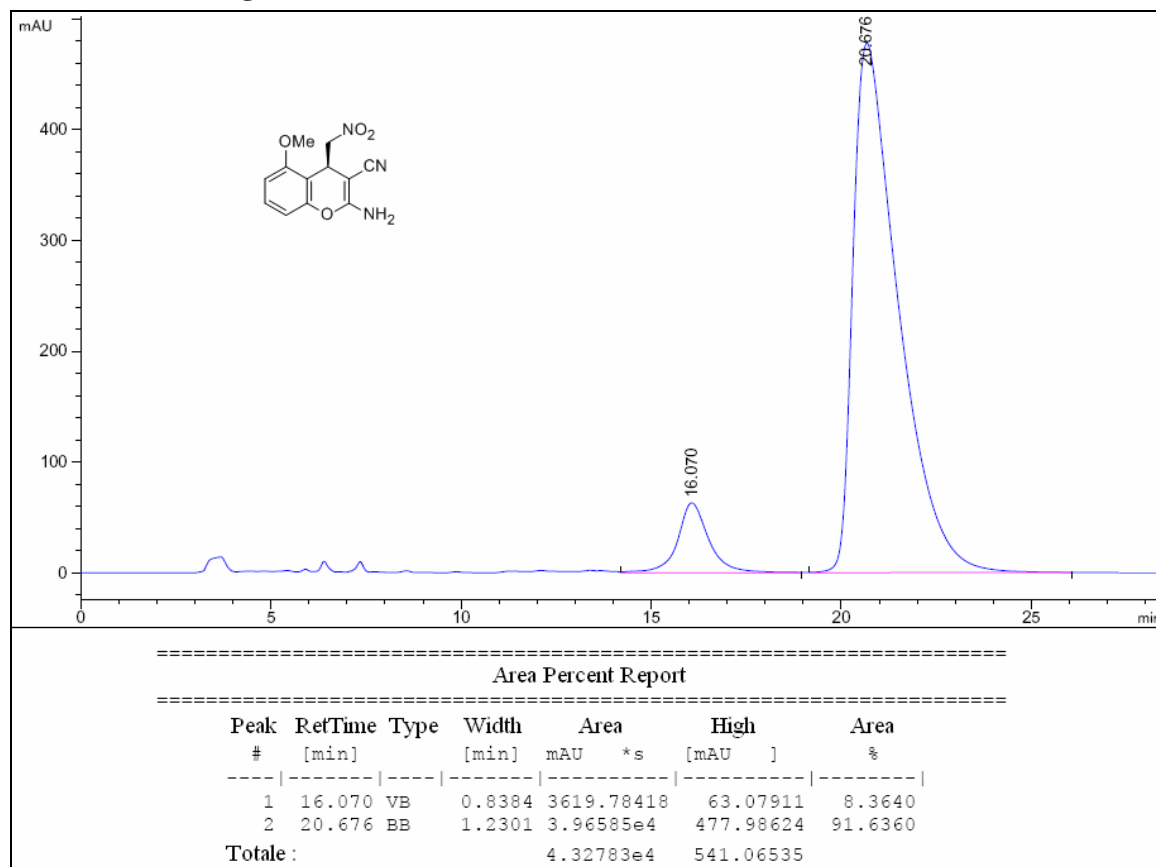



### Racemic **4h**

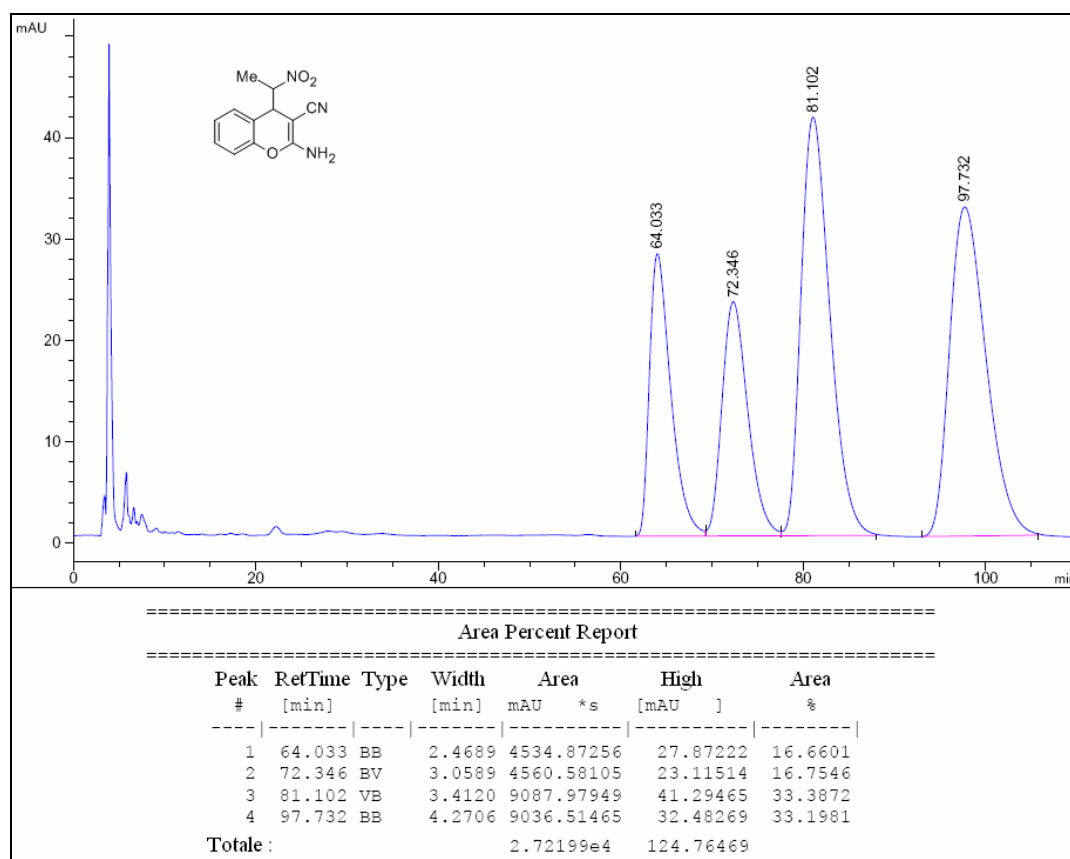

### Enantiomeric enriched **4h**

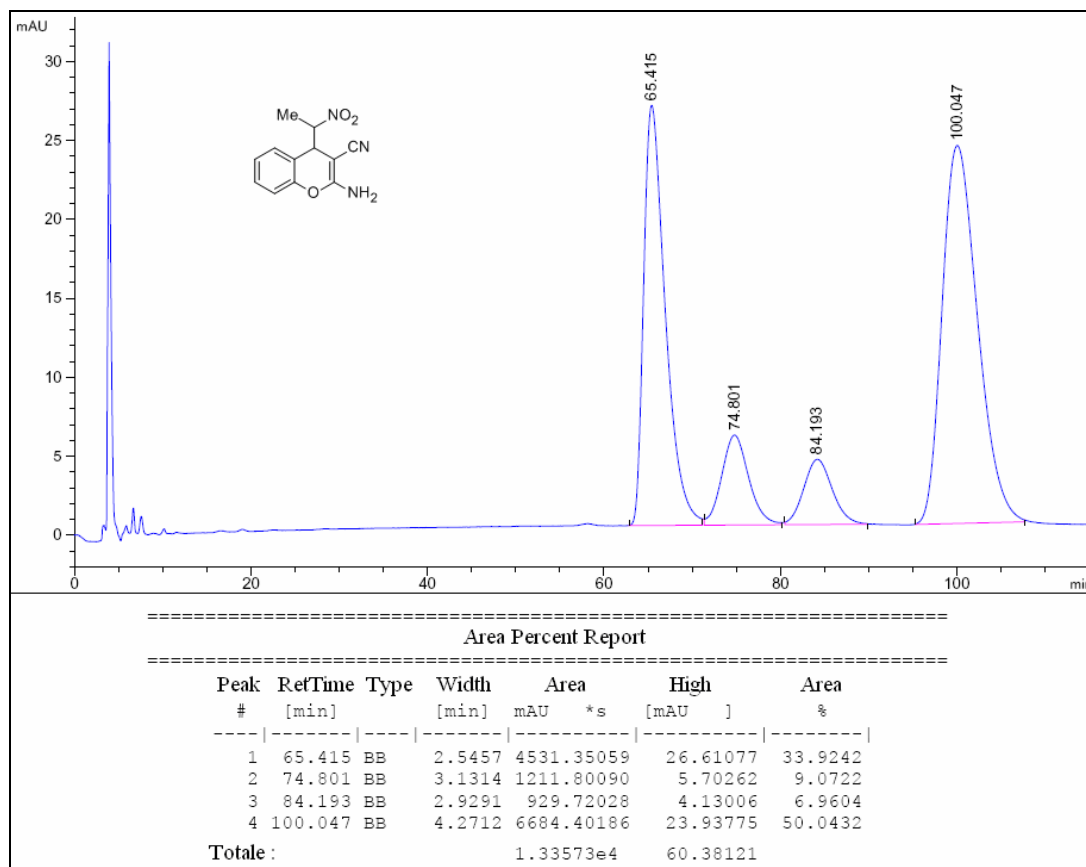

Racemic **5a**

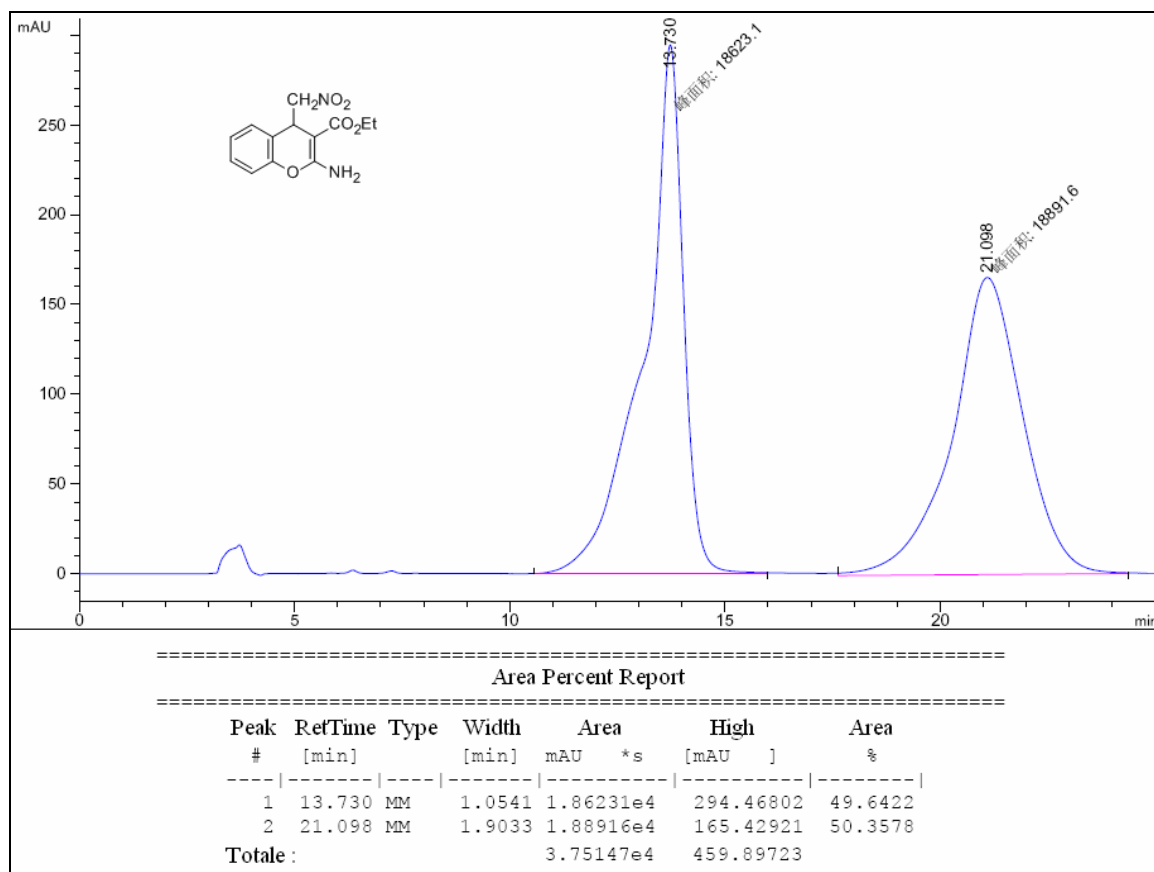

Enantiomeric enriched **5a**

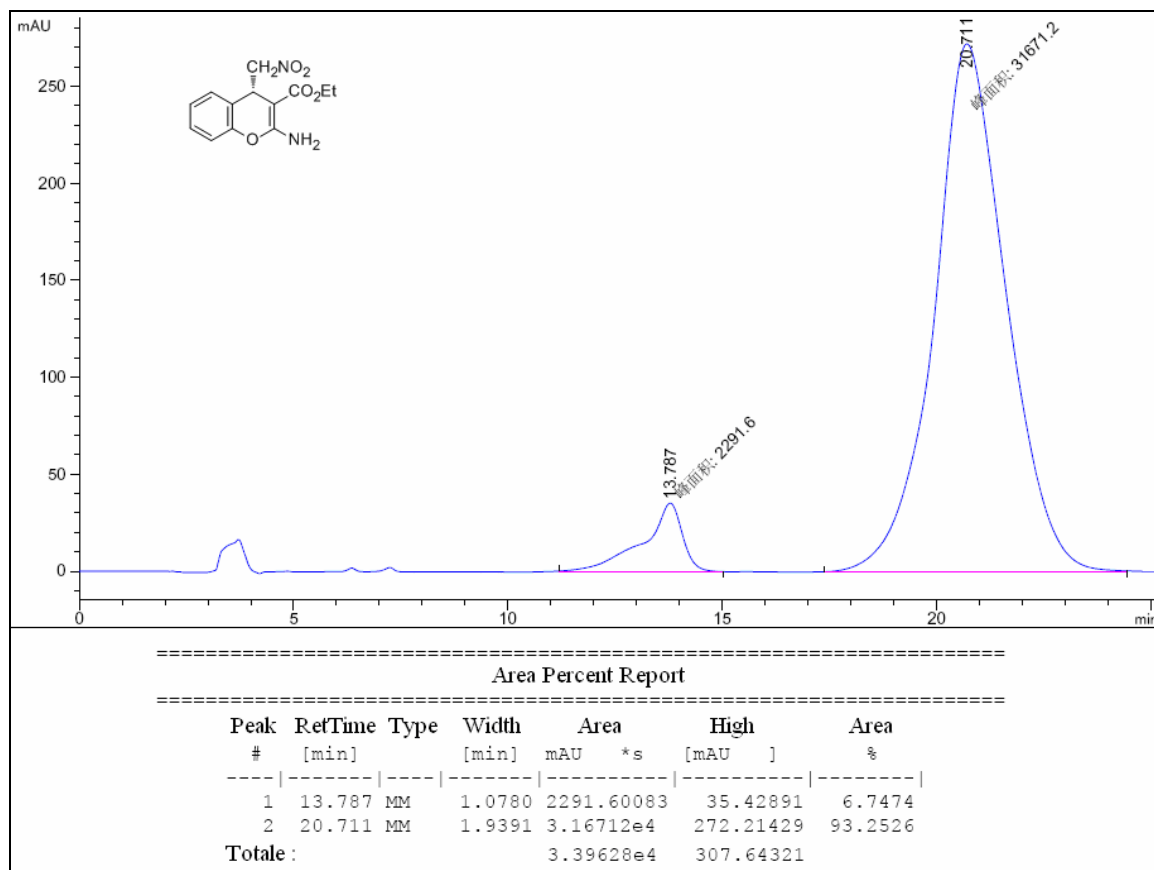

Racemic **5b**

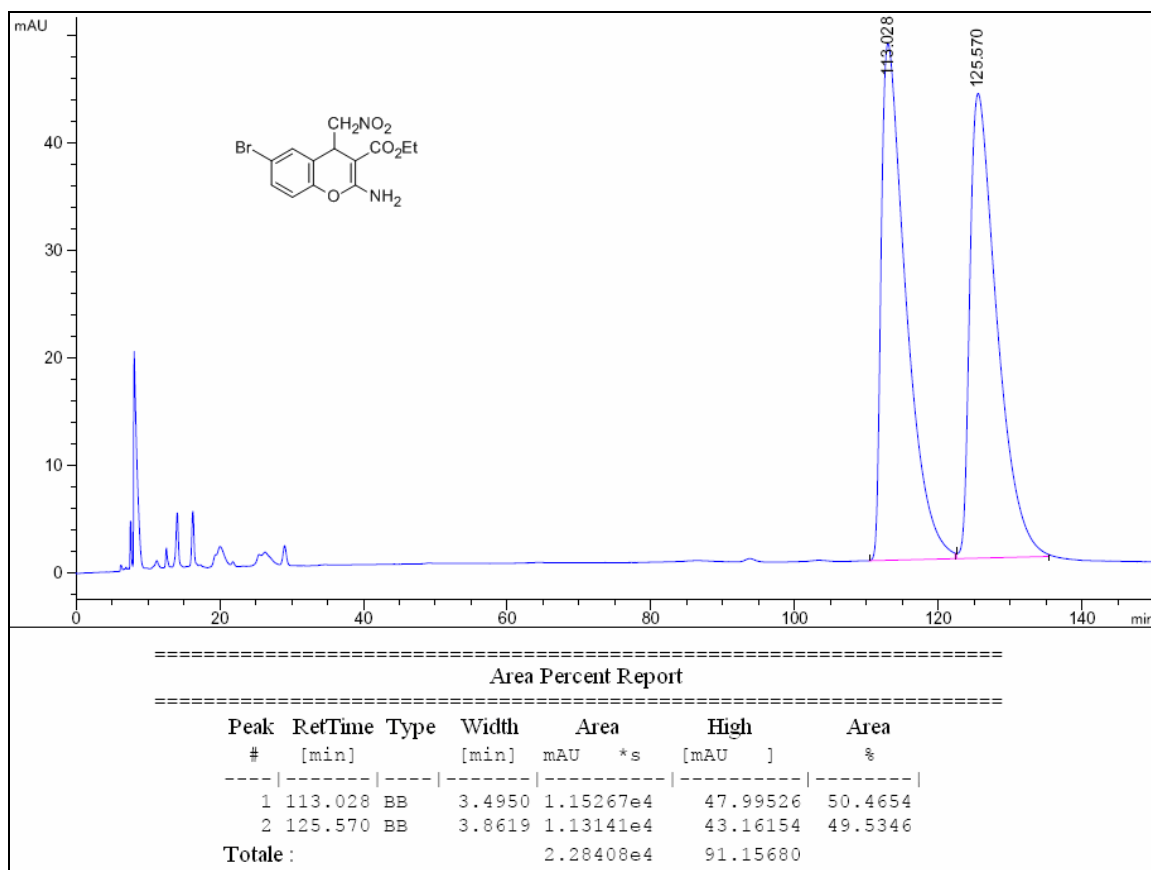

Enantiomeric enriched **5b**

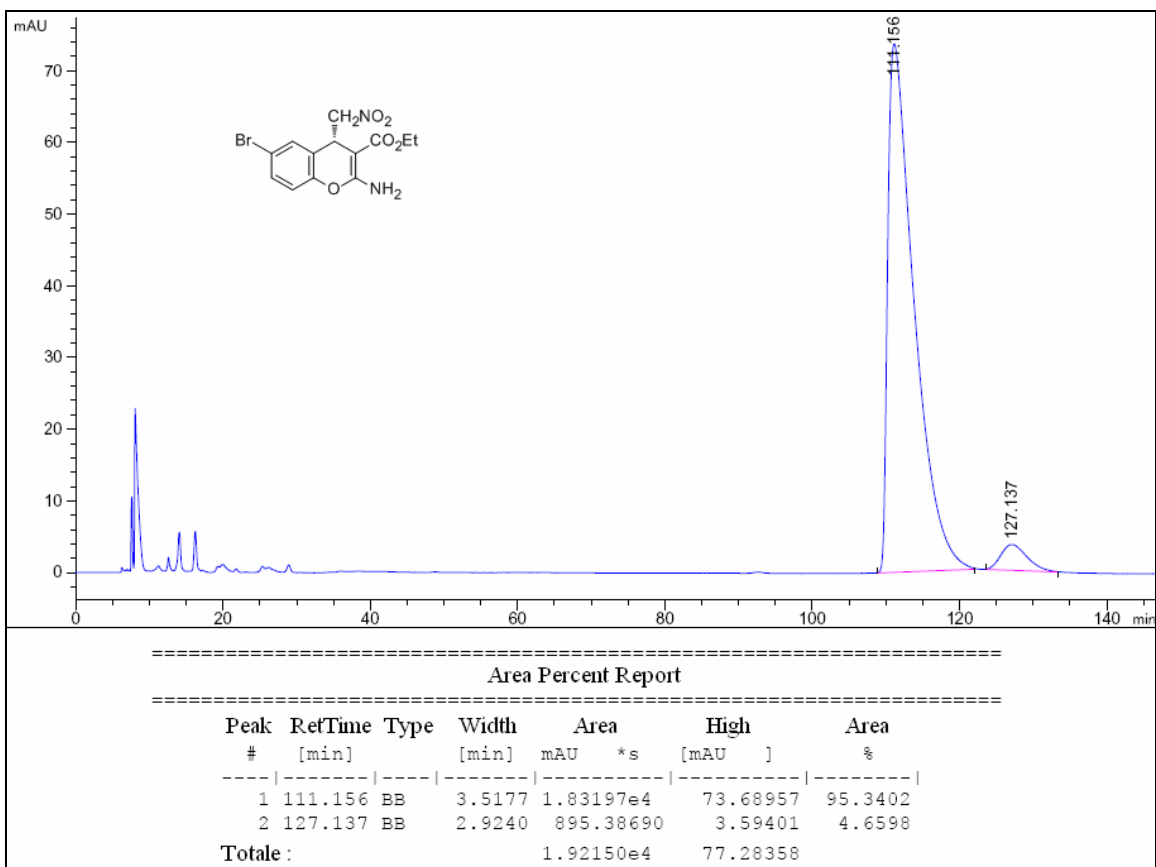

### Racemic **5c**

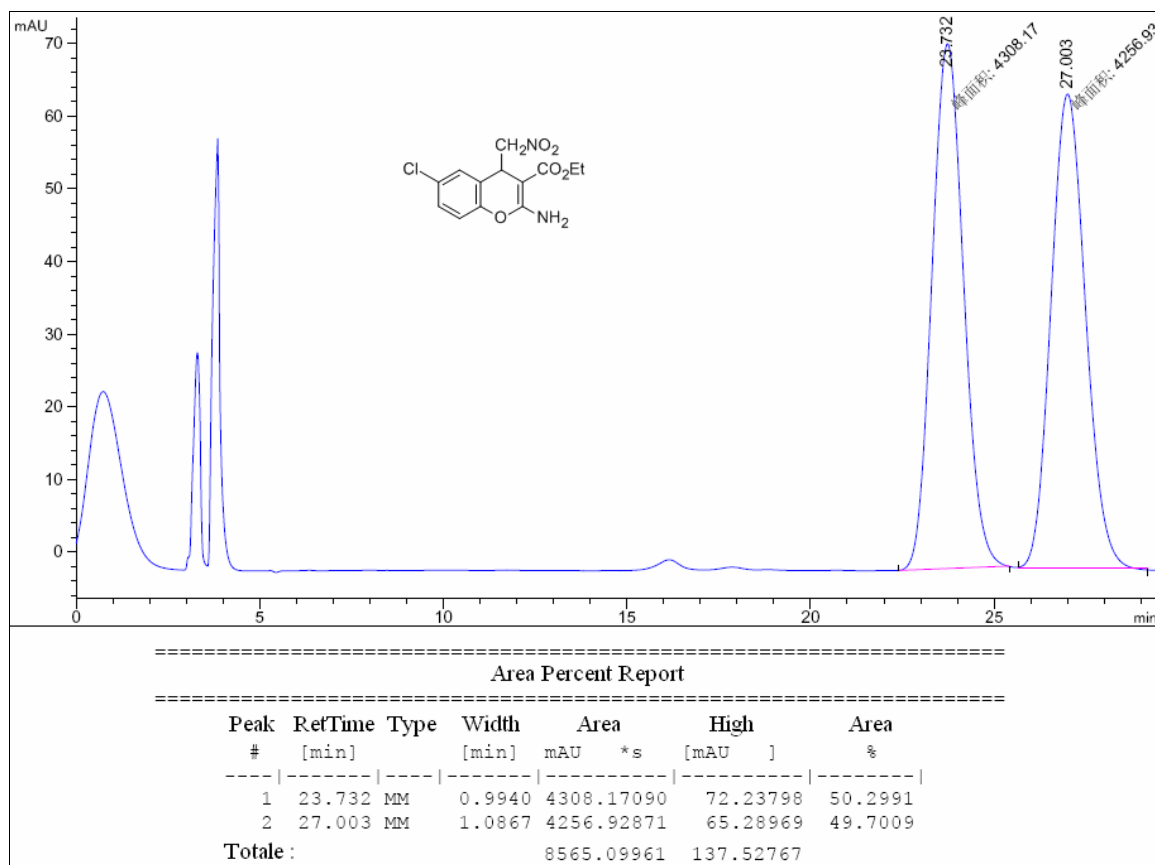

### Enantiomeric enriched **5c**

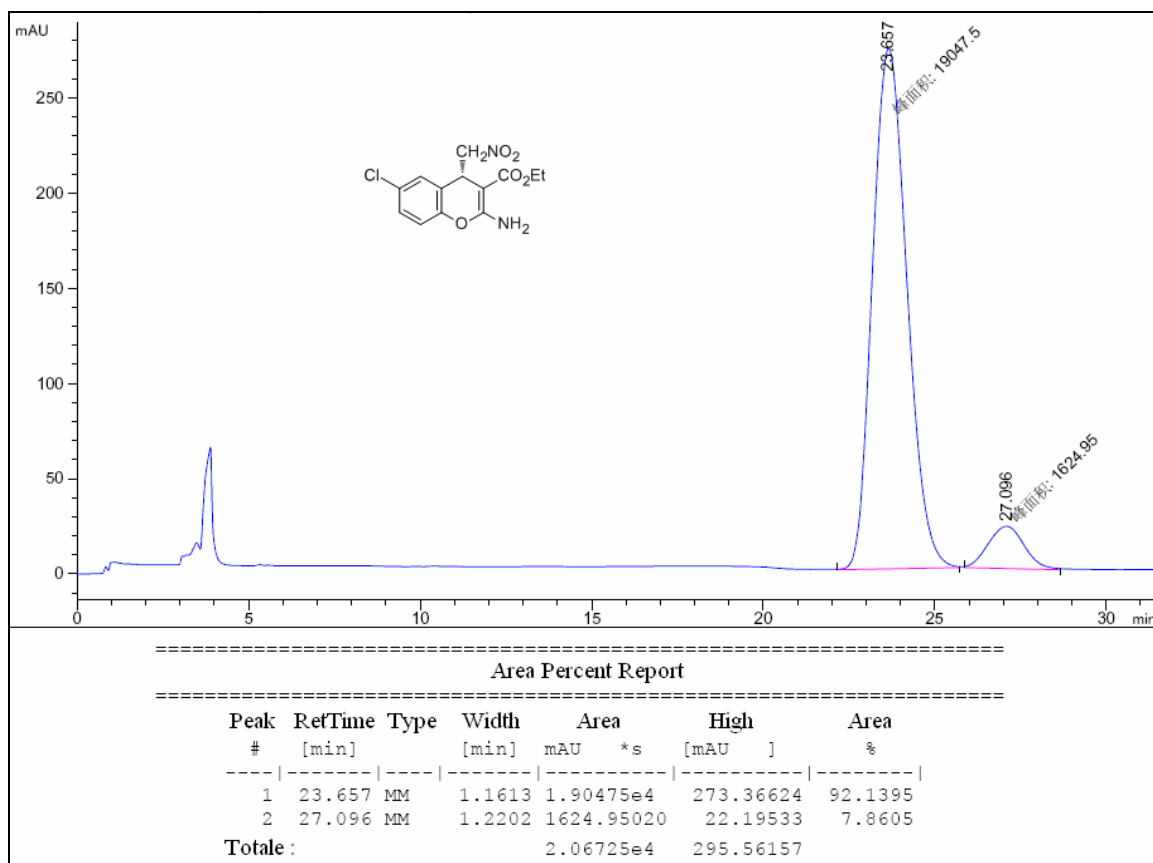

### Racemic **5d**

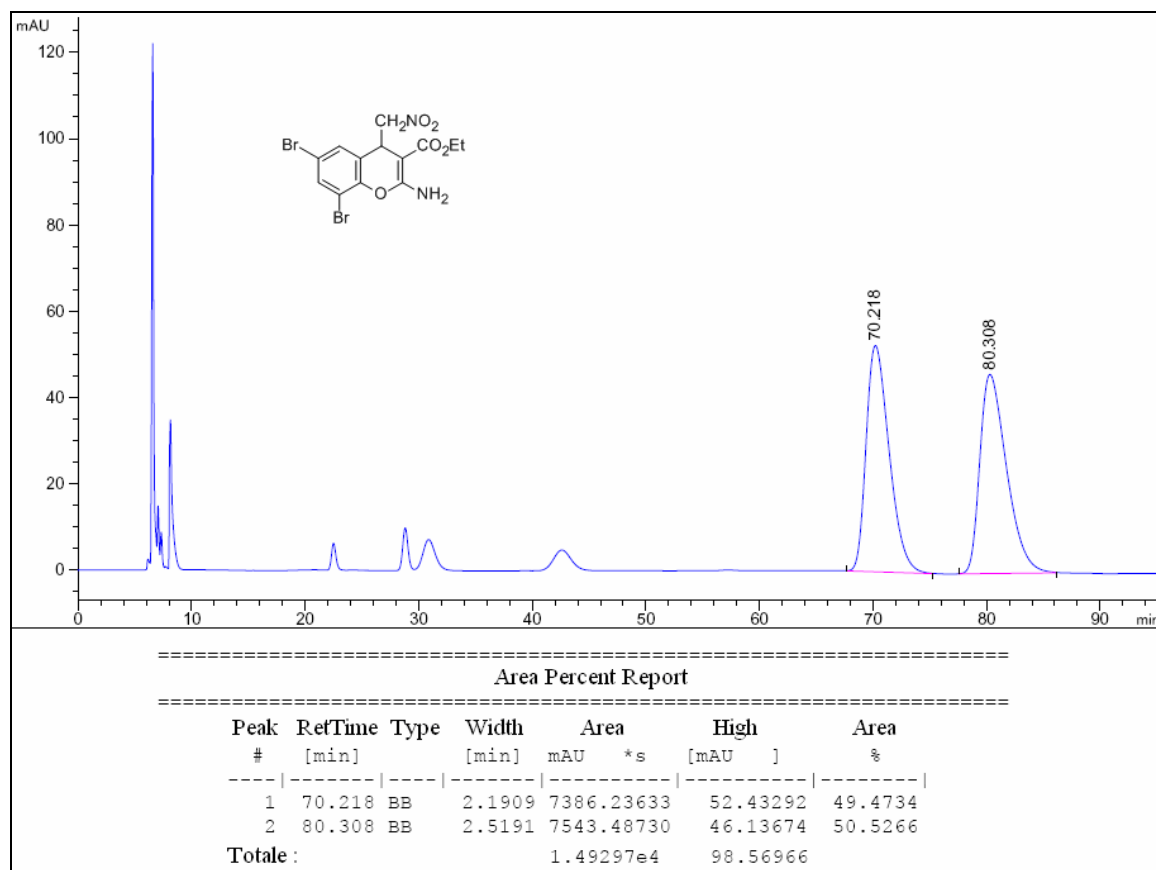

### Enantiomeric enriched **5d**

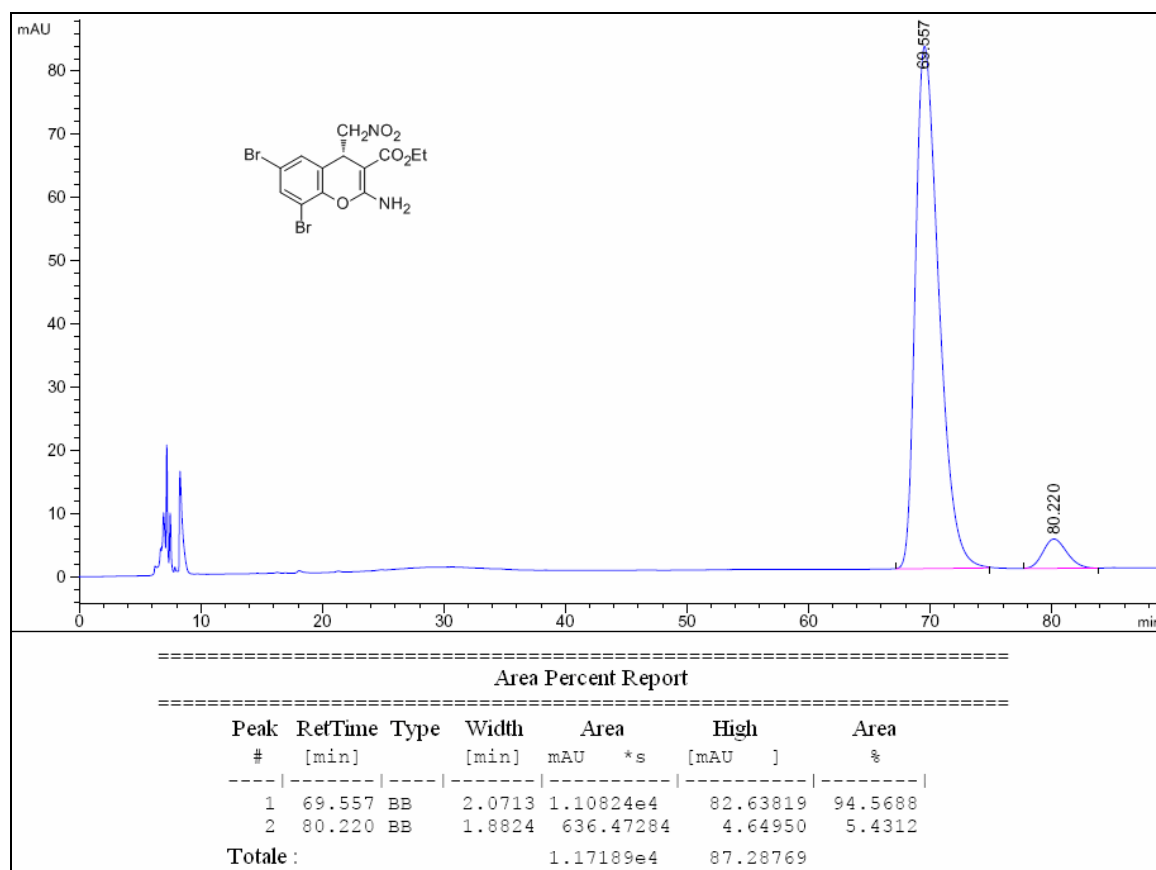

Racemic **5e**

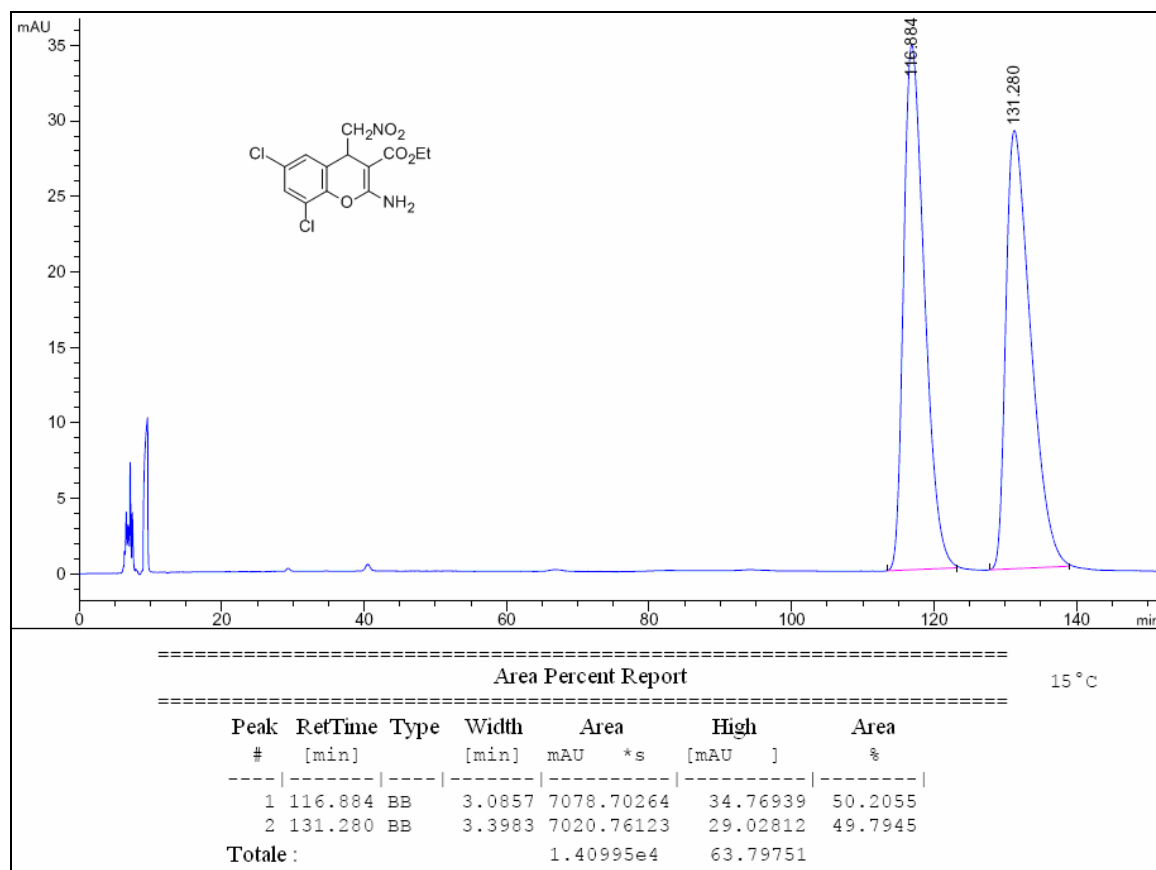

Enantiomeric enriched **5e**

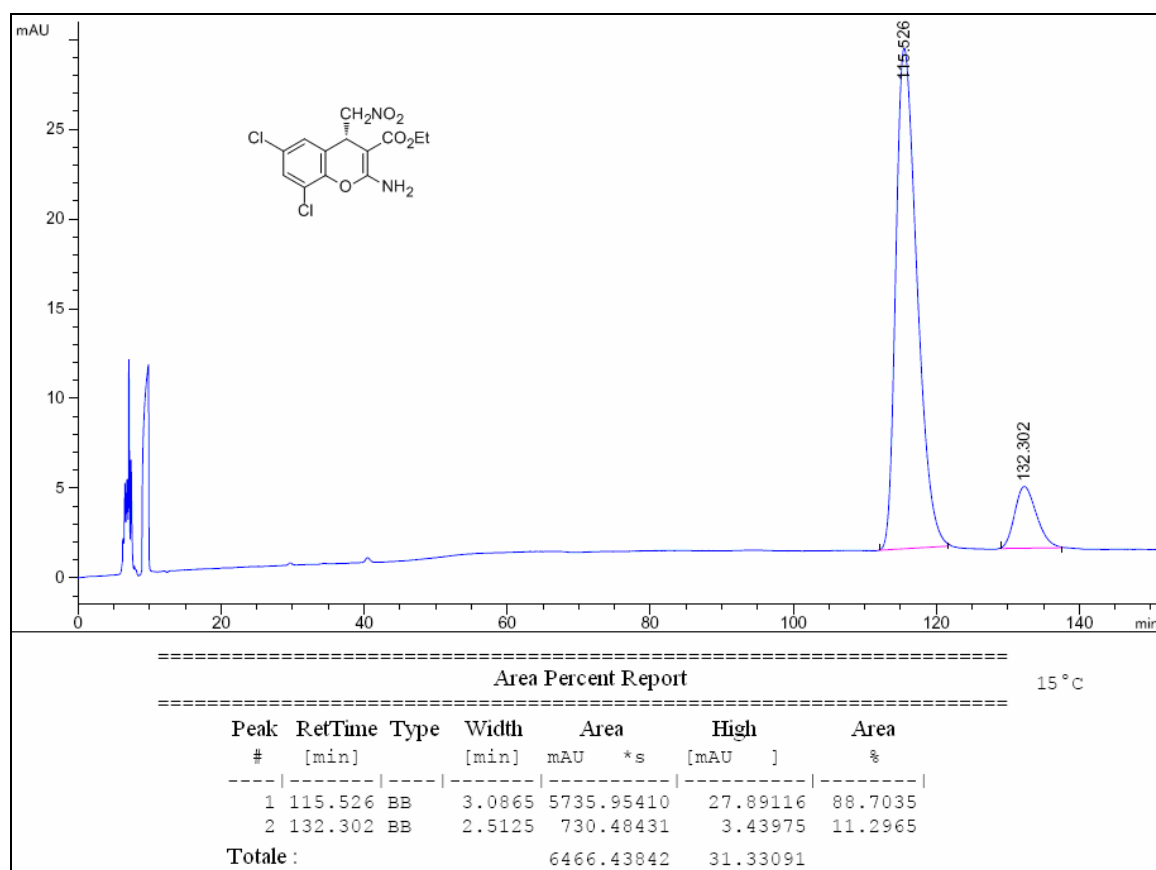

Racemic **5e**

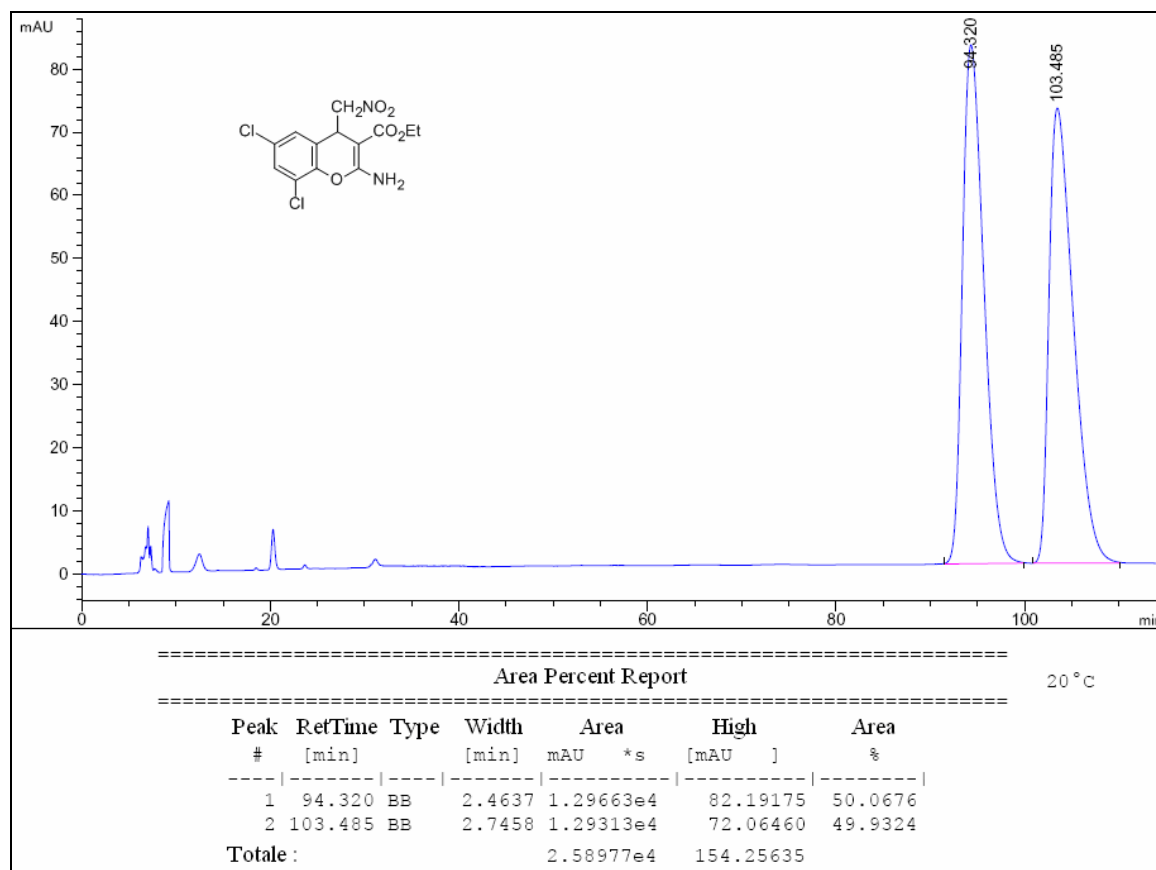

Enantiomeric enriched **5e** (After recrystallization from dichloromethane/n-hexane)

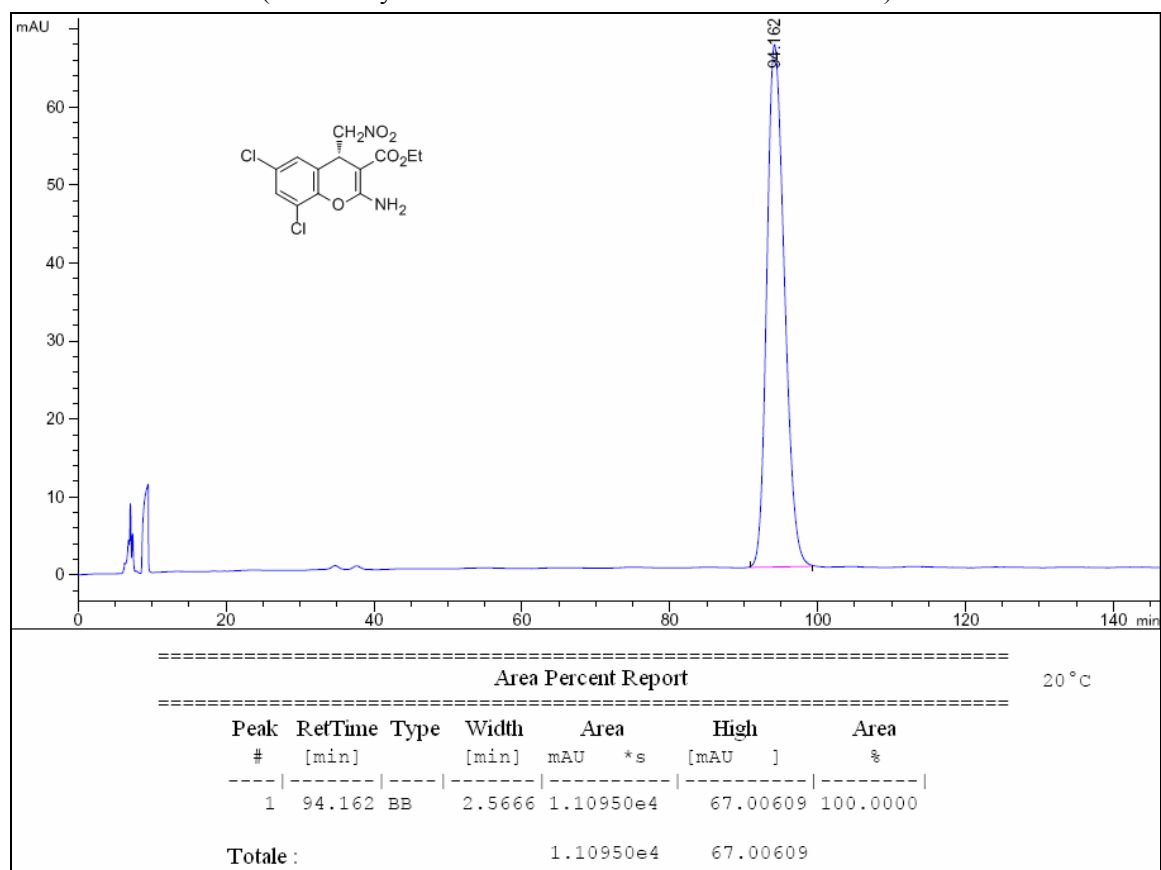

Racemic **5f**

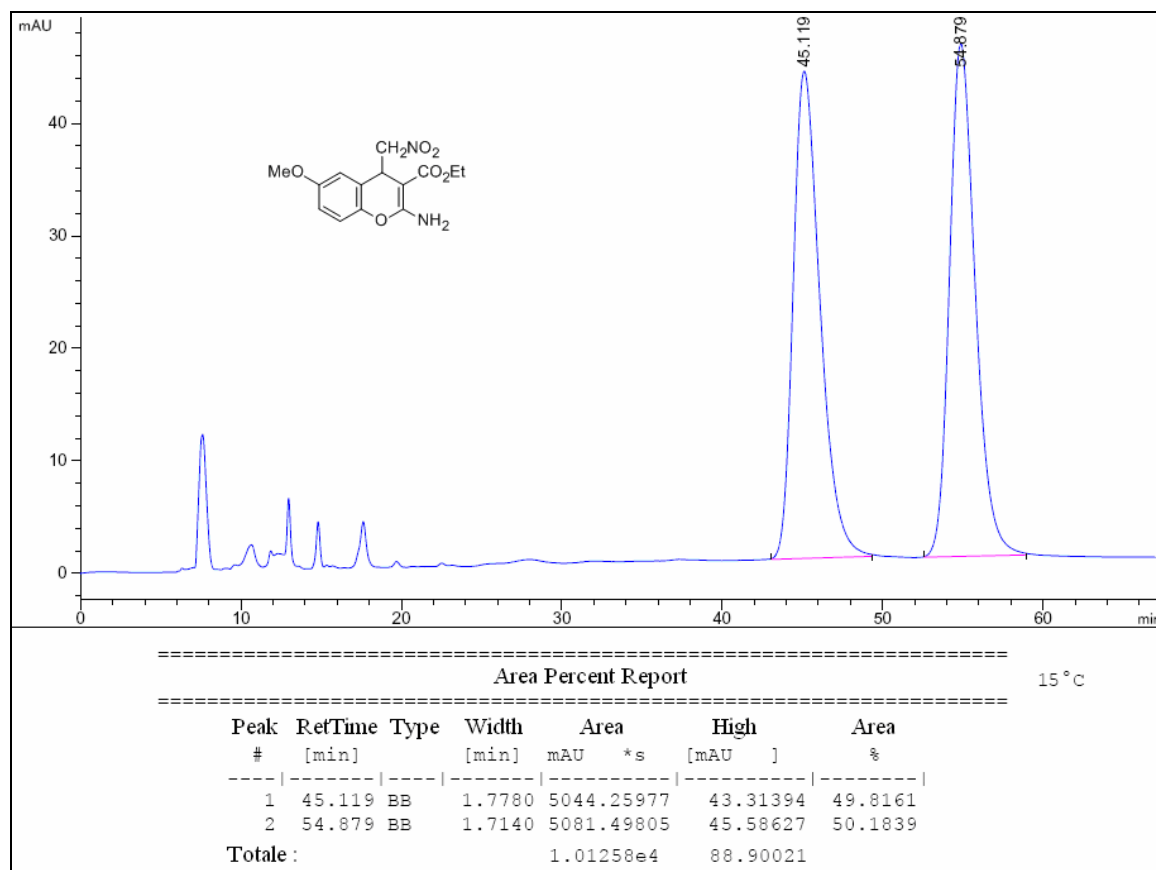

Enantiomeric enriched **5f**

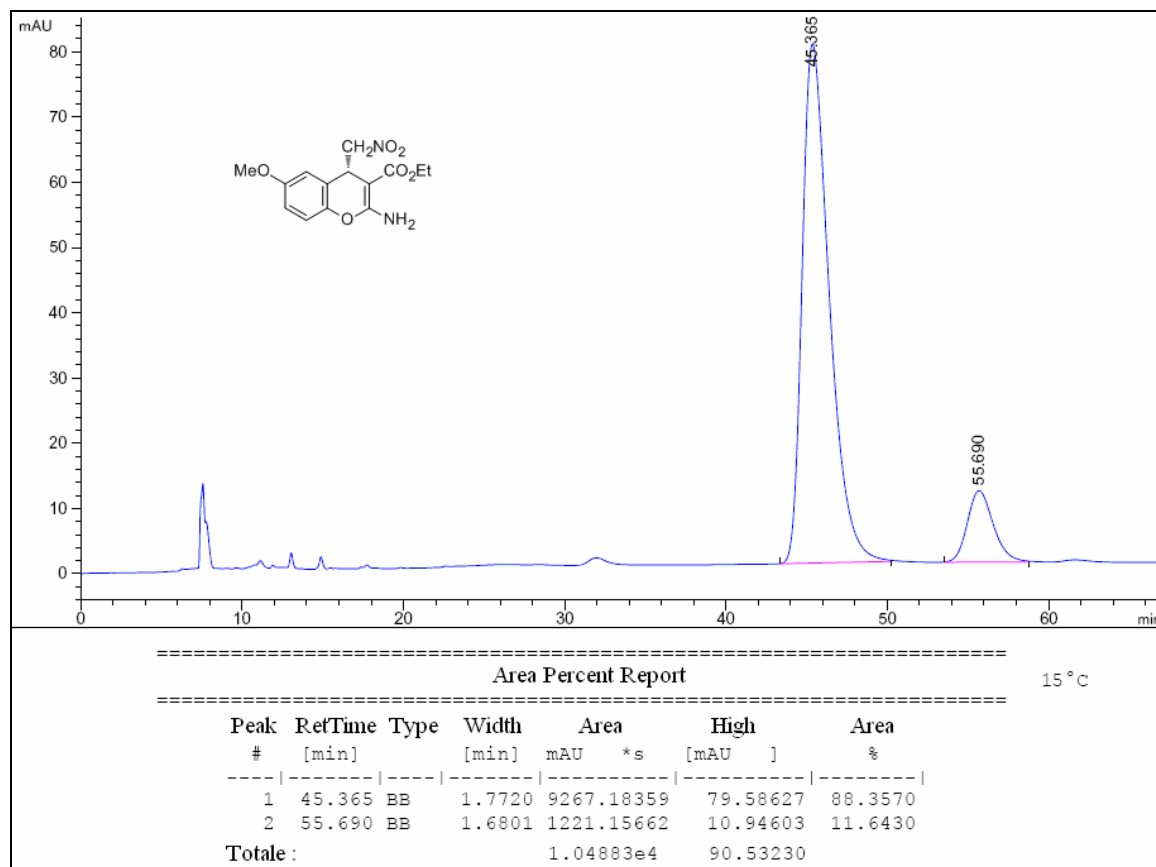



Racemic **5f**

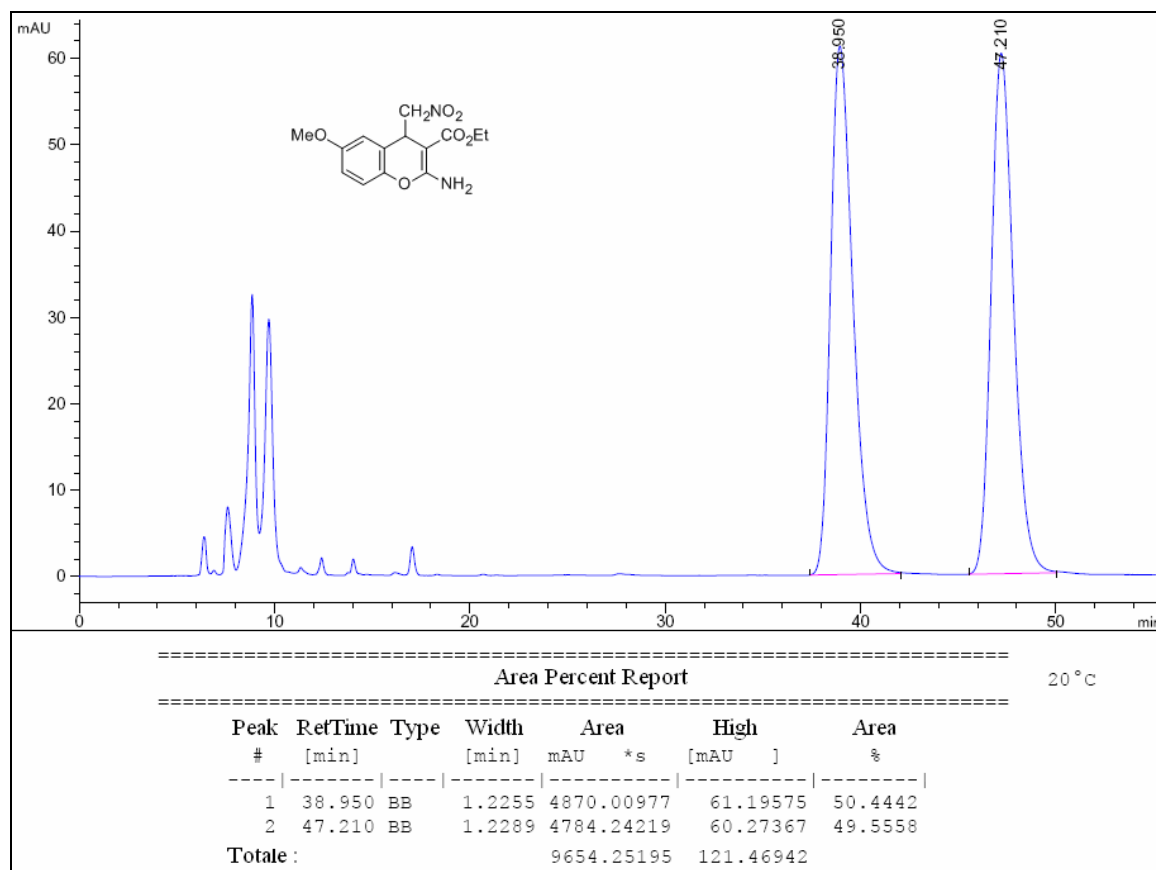

Enantiomeric enriched **5f** (After recrystallization from dichloromethane/n-hexane)

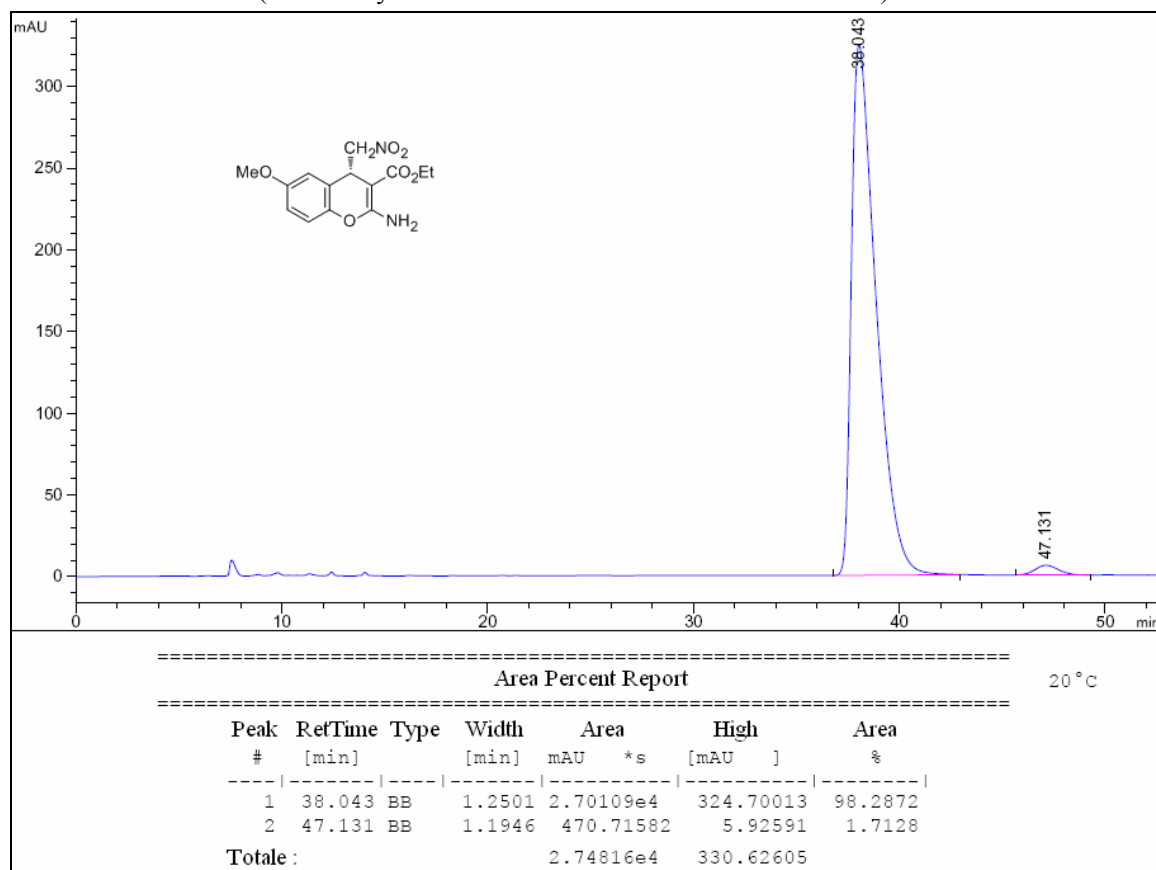

Racemic **5g**

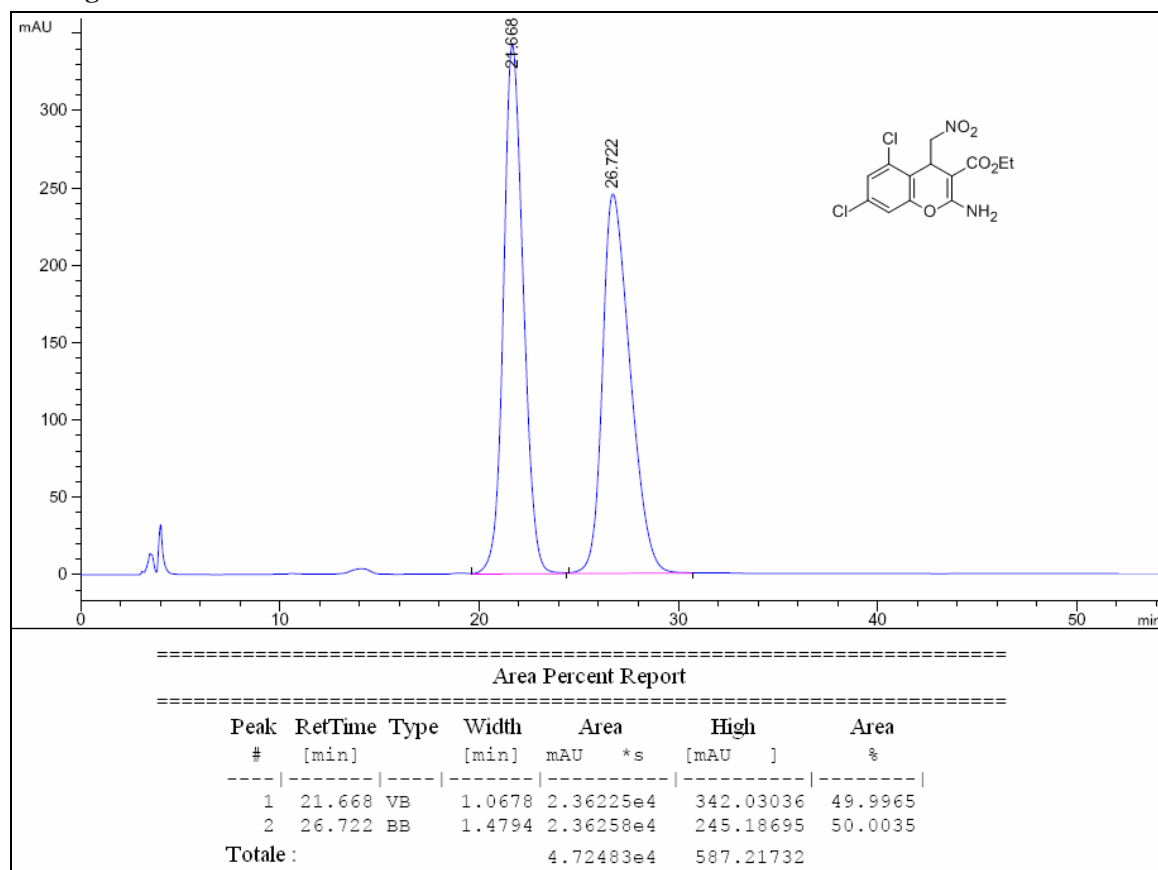

Enantiomeric enriched **5g**

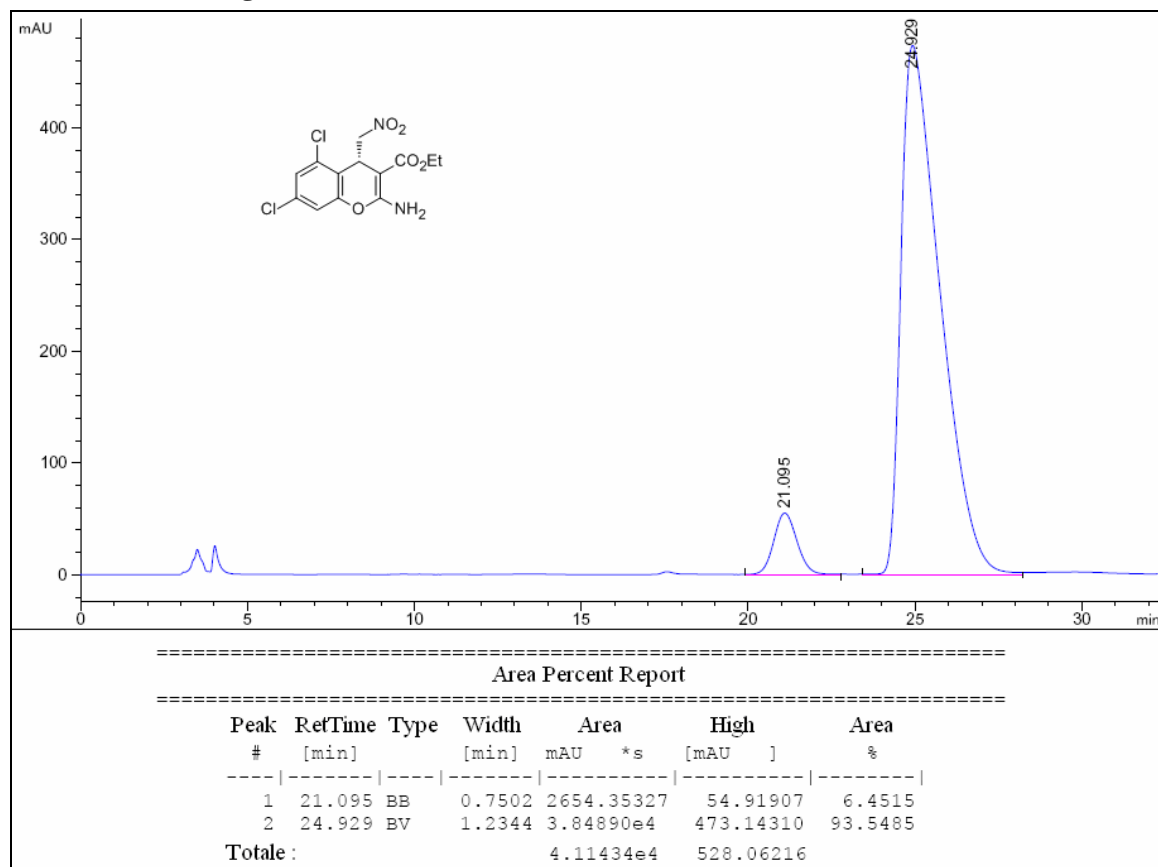

### Racemic **5h**

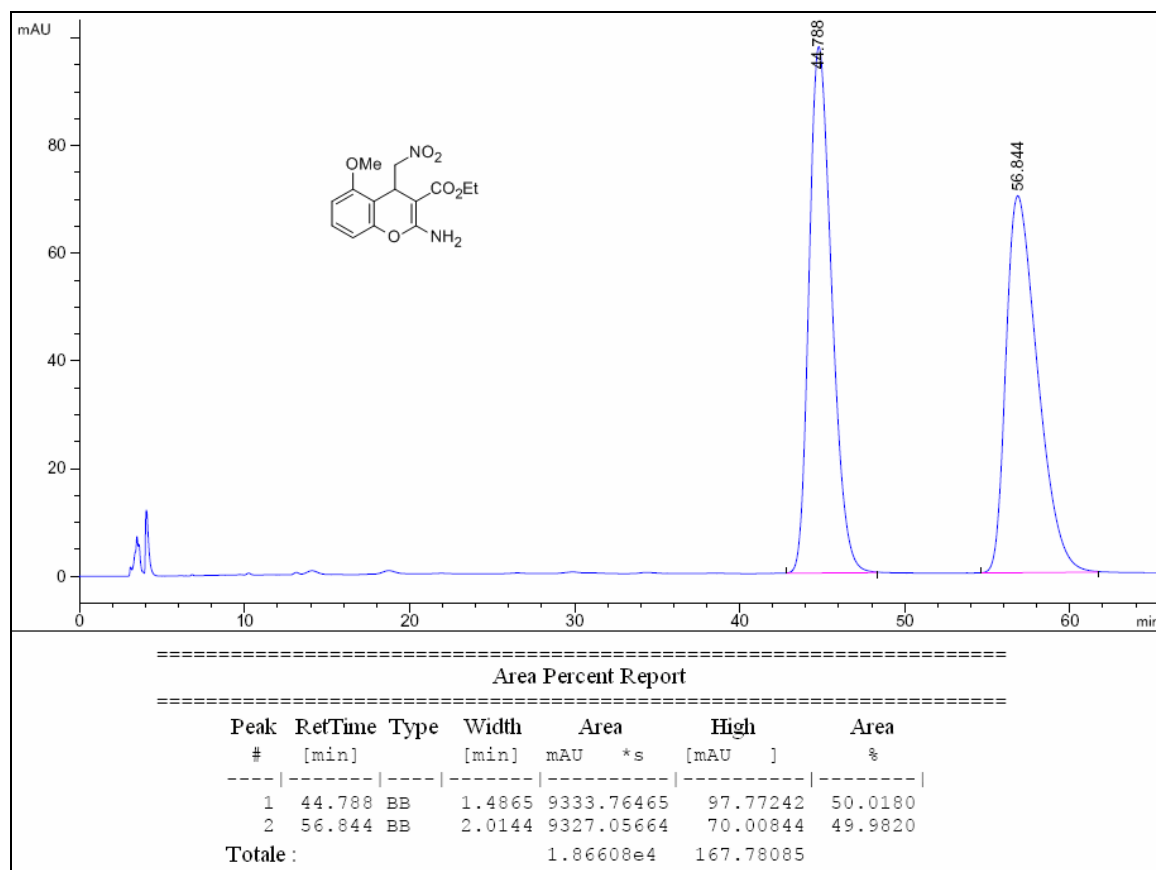

### Enantiomeric enriched **5h**

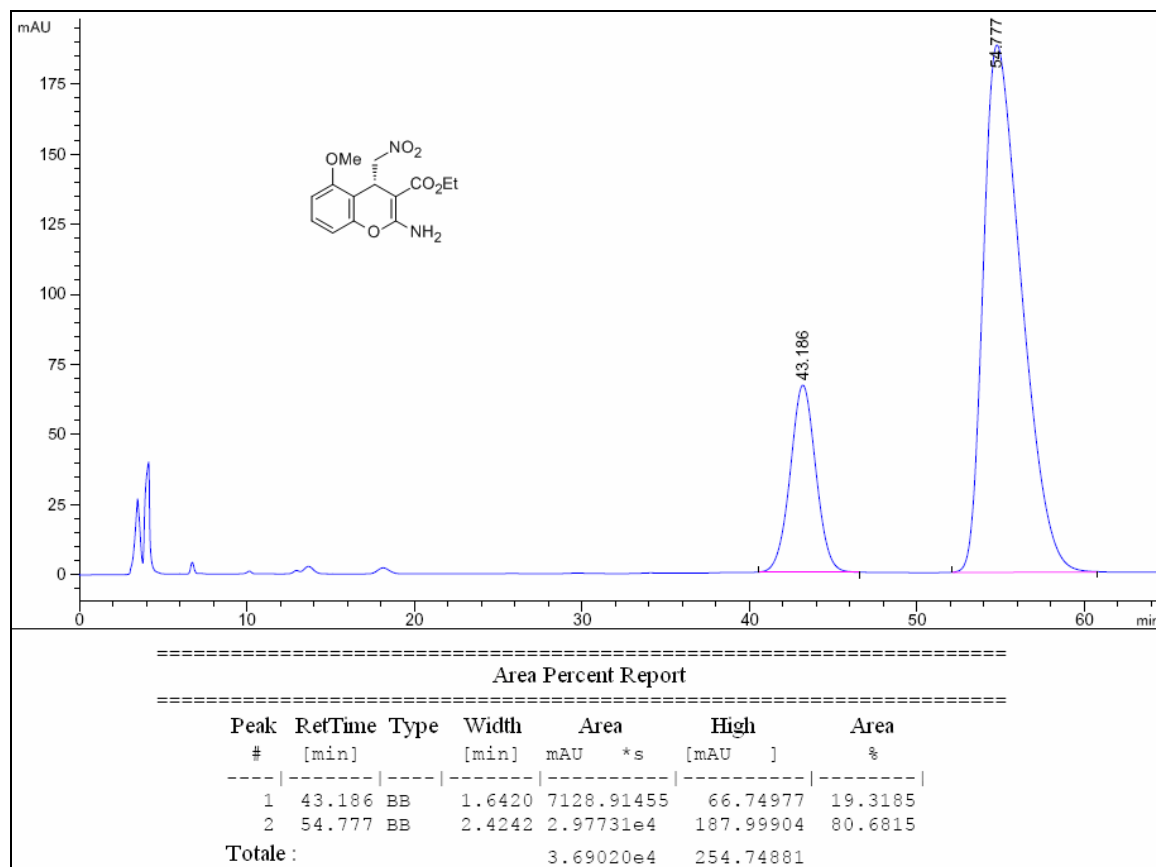

Supplement: c2cc30731f.pdf [file c2cc30731f.pdf]
